# Supplementary material for: (E)-N'-Arylidene-2-(4-oxoquinazolin-4(3H)-yl) acetohydrazides: Synthesis and evaluation of antitumor cytotoxicity and caspase activation activity
Source: PubMed Central journal article supplement (PMC6338265; doi:10.1080/14756366.2018.1555536), 2019-01-17
Supplement: IENZ_A_1555536_SM1546.pdf [file IENZ_A_1555536_SM1546.pdf]

# SUPPLEMENTAL MATERIALS

for

## **(E)-N'-Arylidene-2-(4-oxoquinazolin-4(3H)-yl)acetohydrazides: Synthesis and Evaluation of Caspase Activation Activity and Cytotoxicity**

Le Cong Huan,<sup>a</sup> Cao Viet Phuong,<sup>a</sup> Le Cong Truc,<sup>a</sup> **Vo Nguyen Thanh**,<sup>a</sup> Pham-The Hai,<sup>a</sup> Le-Thi-Thu Huong,<sup>b</sup> Nguyen Thi Thuan,<sup>a</sup> Eun Jae Park,<sup>c</sup> A Young Ji,<sup>c</sup> Jong Soon Kang,<sup>d</sup> Sang-Bae Han,<sup>\*c</sup> Phuong-Thao Tran,<sup>\*a</sup> Nguyen-Hai Nam<sup>\*a</sup>

<sup>a</sup>*Hanoi University of Pharmacy, 13-15 Le Thanh Tong, Hanoi, Vietnam*

<sup>b</sup>*School of Medicine and Pharmacy, Vietnam National University, 144 XuanThuy, Hanoi, VietNam*

<sup>c</sup>*College of Pharmacy, Chungbuk National University, 194-31, Osongsaengmyung-1, Heungdeok, Cheongju, Chungbuk, 28160, Republic of Korea*

<sup>d</sup>*Bio-Evaluation Center, Korea Research Institute of Bioscience and Biotechnology, Cheongju, Chungbuk, Republic of Korea*

**Keywords:** Acetohydrazides, quinazolin-4-one, cytotoxicity, caspase activation.

**\*Corresponding authors:** Tel.: +84-4-39330531; Fax: +84-4-39332332; Emails: [namnh@hup.edu.vn](mailto:namnh@hup.edu.vn) (N.H. Nam); [thaotp119@gmail.com](mailto:thaotp119@gmail.com) (T.P. Thao).

## **ALL <sup>1</sup>H & <sup>13</sup>C NMR SPECTRA OF THE COMPOUNDS**

<sup>1</sup>H NMR of compound 5a

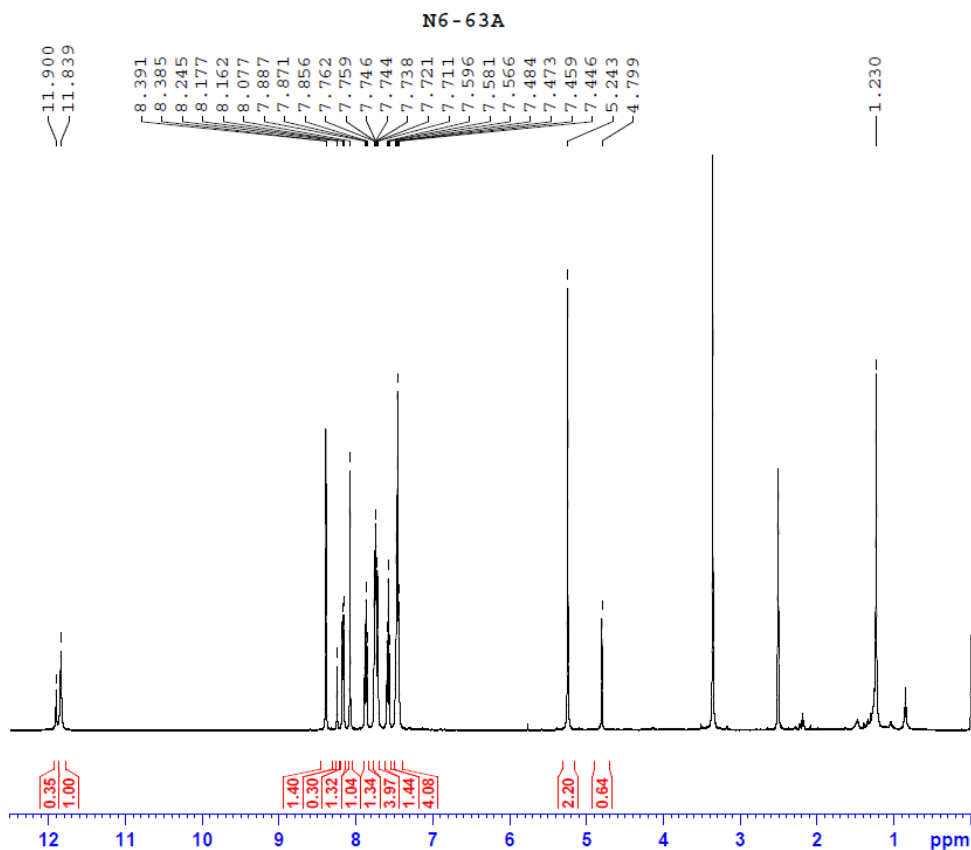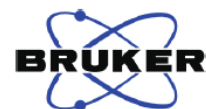

Current Data Parameters  
 NAME N6-63A  
 EXPNO 12  
 PROCNO 1

F2 - Acquisition Parameters  
 Date\_ 20170113  
 Time 9.43  
 INSTRUM spect  
 PROBHD 5 mm PABBO BB/  
 PULPROG zgpg30  
 TD 65536  
 SOLVENT DMSO  
 NS 4  
 DS 4  
 SWH 31250.000 Hz  
 FIDRES 0.476837 Hz  
 AQ 1.0485760 sec  
 RG 191.38  
 DW 16.000 usec  
 DE 6.50 usec  
 TE 296.4 K  
 D1 2.00000000 sec  
 D11 0.03000000 sec  
 TD0 1

----- CHANNEL f1 -----  
 SF01 125.7703637 MHz  
 NUC1 13C  
 P1 9.50 usec  
 PLW1 90.00000000 W

----- CHANNEL f2 -----  
 SF02 500.1320005 MHz  
 NUC2 1H  
 CPOPRG[2] waltz16  
 PCPD2 80.00 usec  
 PLW2 24.00000000 W  
 PLW12 0.36015001 W  
 PLW13 0.23050000 W

F2 - Processing parameters  
 SI 65536  
 SF 125.7578474 MHz  
 WDW EM  
 SSB 0  
 LB 1.00 Hz  
 GB 0  
 PC 1.40

**<sup>13</sup>C NMR of compound 5a**

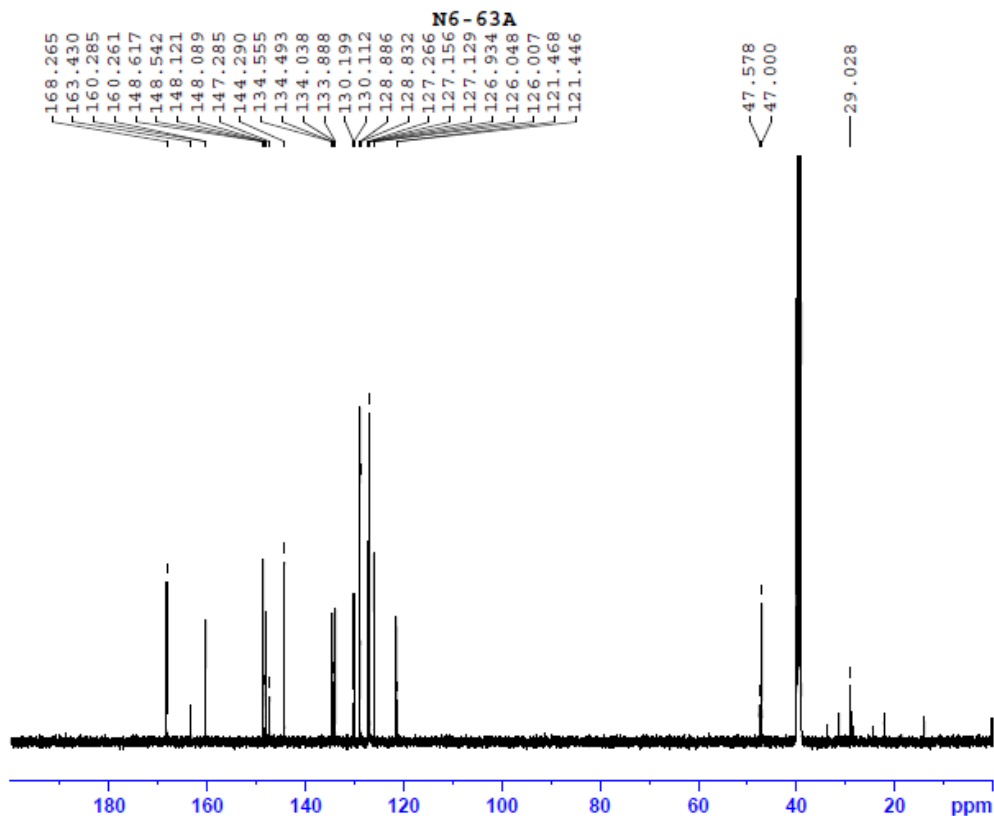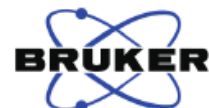

Current Data Parameters  
 NAME N6-63A  
 EXPNO 12  
 PROCNO 1

F2 - Acquisition Parameters  
 Date\_ 20170113  
 Time 9.43  
 INSTRUM spect  
 PROBHD 5 mm PABBO BB/  
 PULPROG zgpg30  
 TD 65536  
 SOLVENT DMSO  
 NS 4  
 DS 4  
 SWH 31250.000 Hz  
 FIDRES 0.476837 Hz  
 AQ 1.0485760 sec  
 RG 191.38  
 DW 16.000 usec  
 DE 6.50 usec  
 TE 296.4 K  
 D1 2.00000000 sec  
 D11 0.03000000 sec  
 TD0 1

----- CHANNEL f1 -----  
 SF01 125.7703637 MHz  
 NUC1 13C  
 P1 9.50 usec  
 PLW1 90.00000000 W

----- CHANNEL f2 -----  
 SF02 500.1320005 MHz  
 NUC2 1H  
 CPOPRG[2] waltz16  
 PCPD2 80.00 usec  
 PLW2 24.00000000 W  
 PLW12 0.36015001 W  
 PLW13 0.23050000 W

F2 - Processing parameters  
 SI 65536  
 SF 125.7578474 MHz  
 WDW EM  
 SSB 0  
 LB 1.00 Hz  
 GB 0  
 PC 1.40

### NOESY-1 of compound 5a

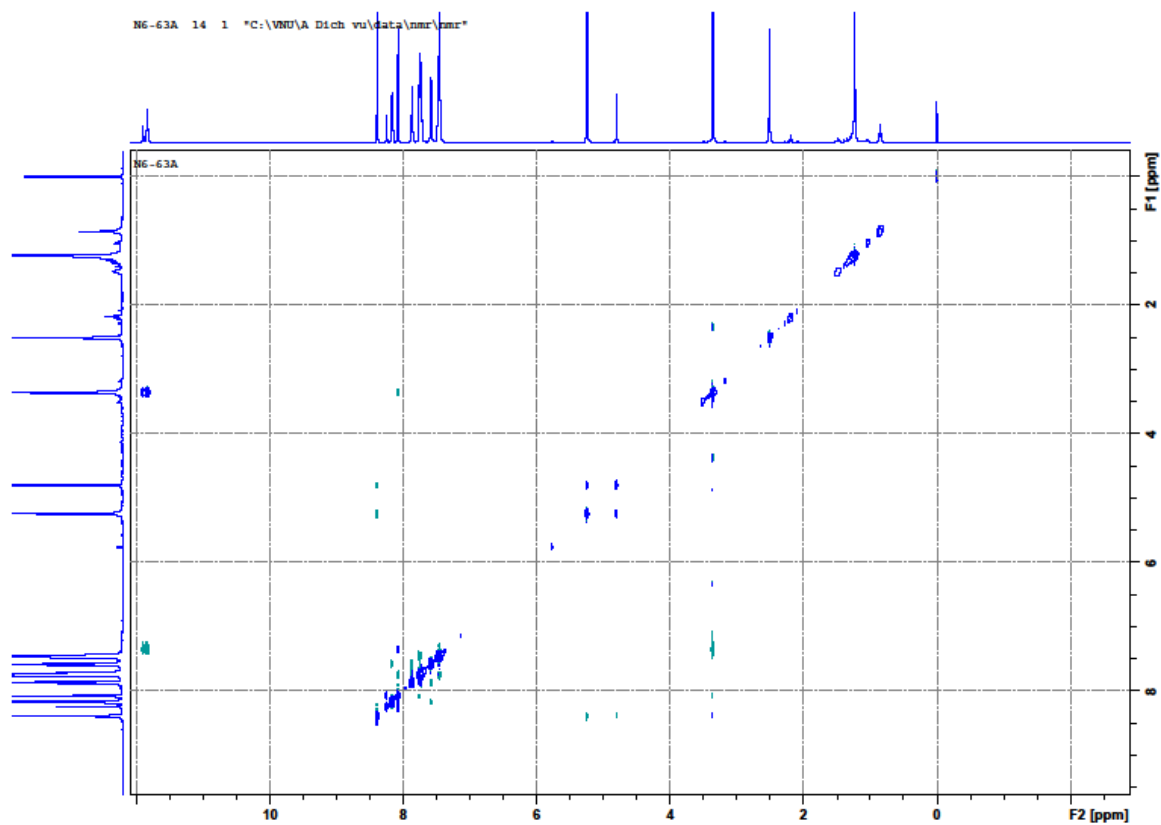

### NOESY-2 of compound 5a

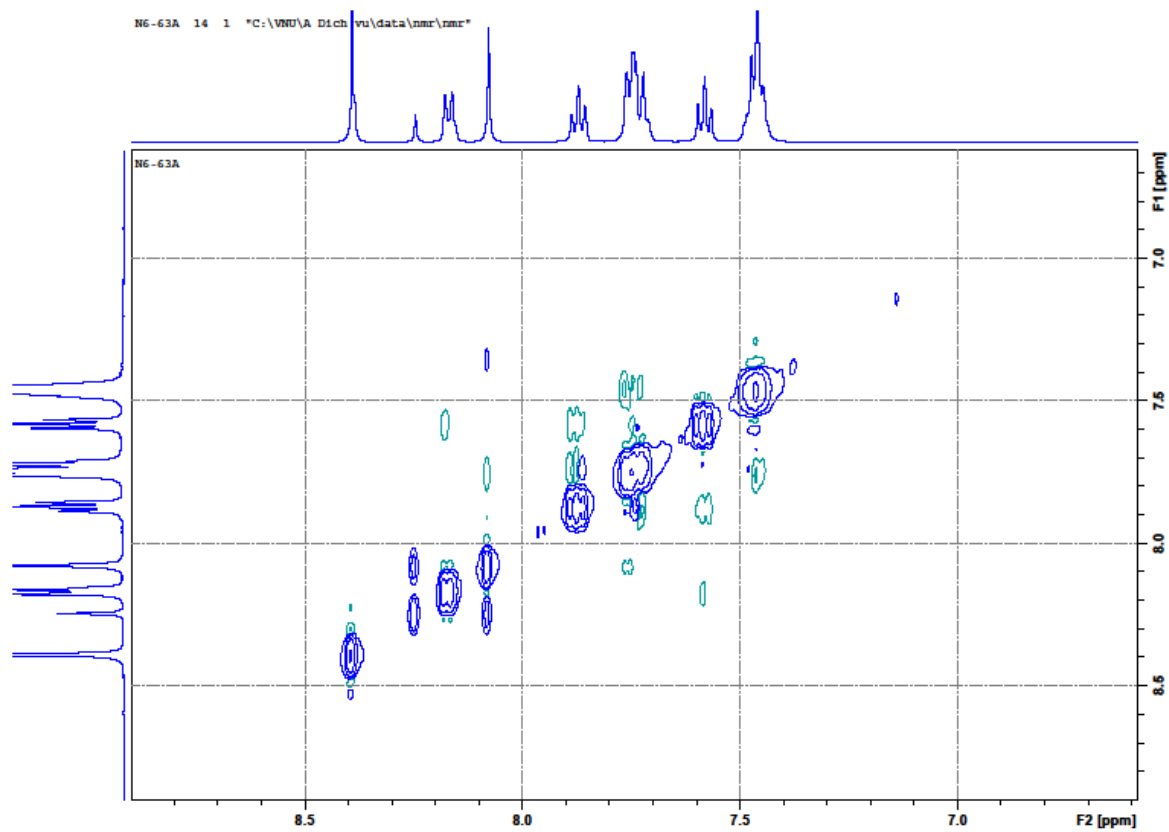

# <sup>1</sup>H NMR of compound 5b

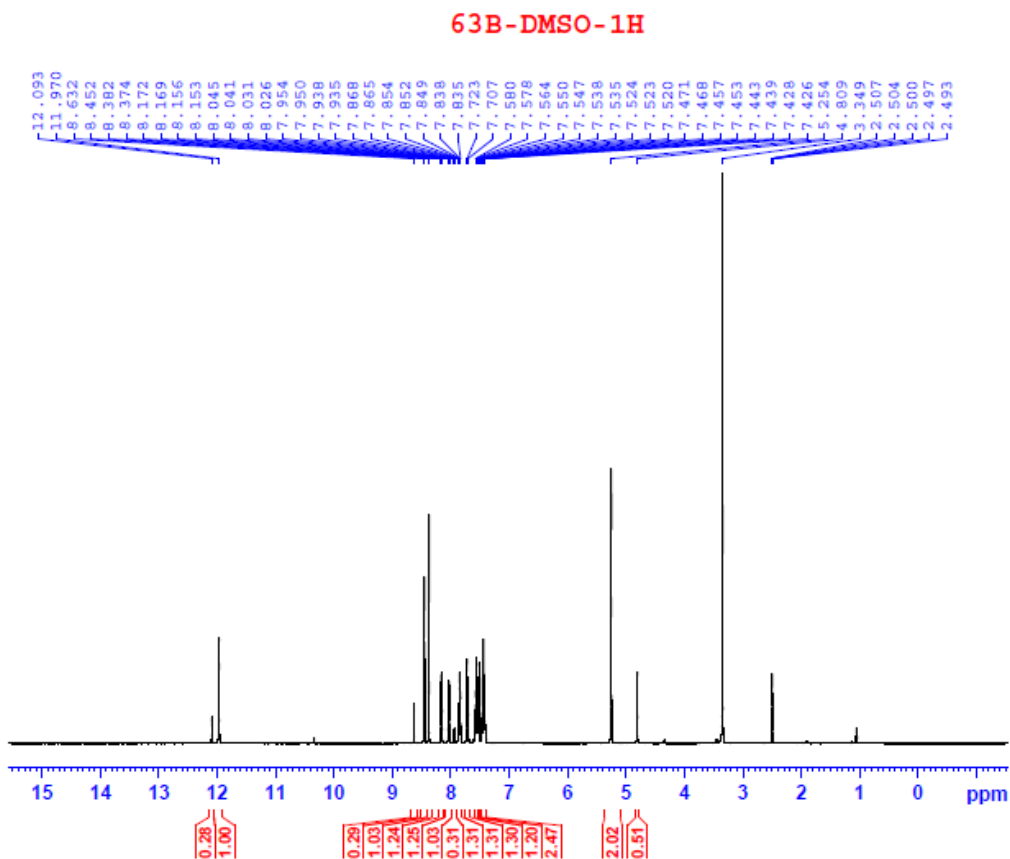

# <sup>13</sup>C NMR of compound 5b

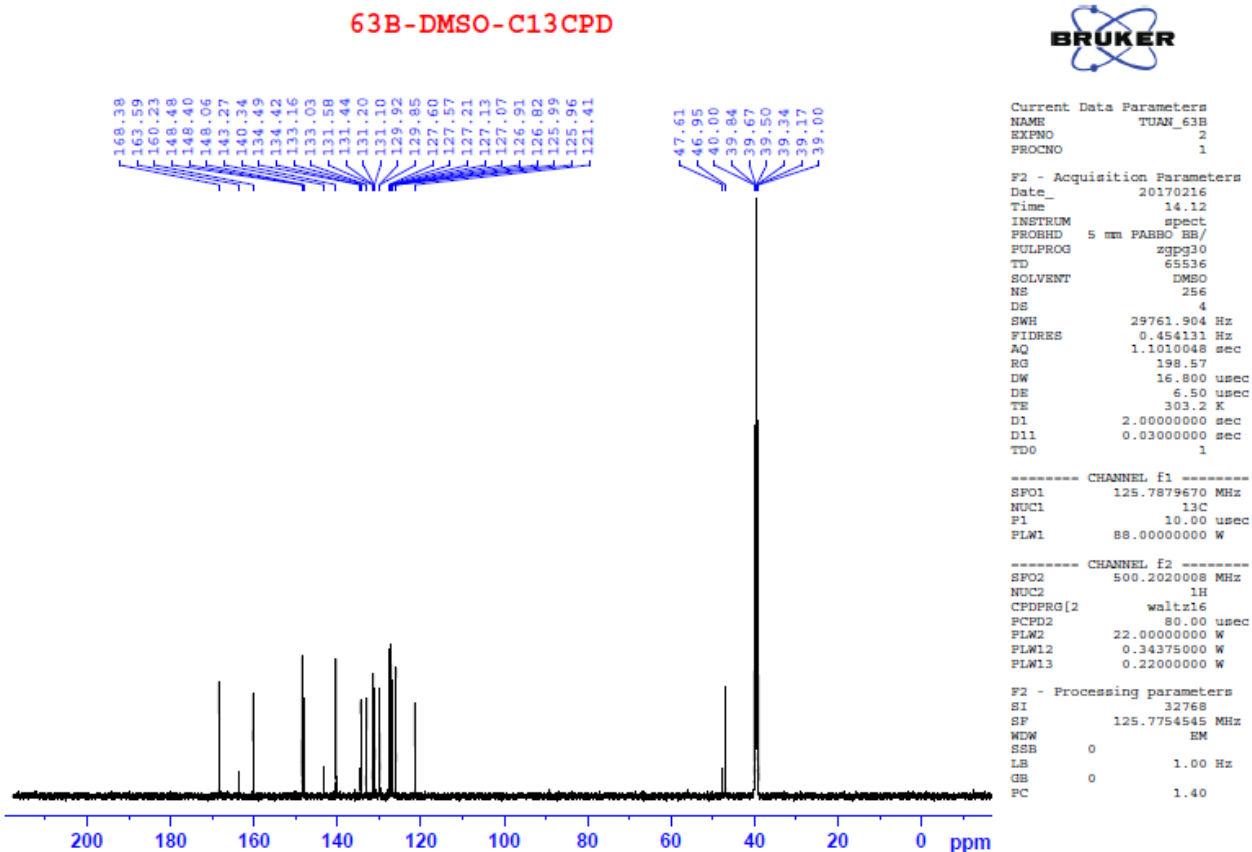

<sup>1</sup>H NMR of compound 5c

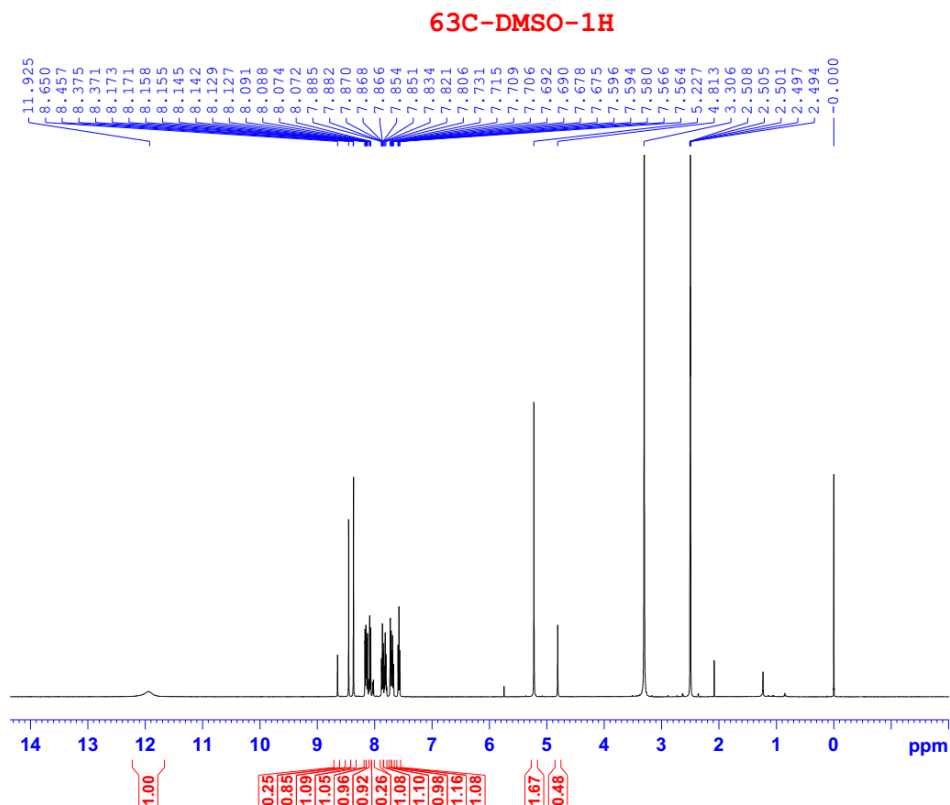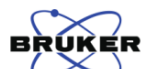

Current Data Parameters  
 NAME TUAN\_63C  
 EXPNO 1  
 PROCNO 1

F2 - Acquisition Parameters  
 Date 20170321  
 Time 16.14  
 INSTRUM spect  
 PROBHD 5 mm PABBO BB/  
 PULPROG zg30  
 TD 65536  
 SOLVENT DMSO  
 NS 16  
 DS 2  
 SWH 10000.000 Hz  
 FIDRES 0.152588 Hz  
 AQ 3.2767999 sec  
 RG 175.34  
 DW 50.000 usec  
 DE 6.50 usec  
 TE 303.2 K  
 D1 1.00000000 sec  
 TDO 1

----- CHANNEL f1 -----  
 SFO1 500.2030889 MHz  
 NUC1 1H  
 P1 10.00 usec  
 PLW1 22.00000000 W

F2 - Processing parameters  
 SI 65536  
 SF 500.2000046 MHz  
 WDW EM  
 SSB 0  
 LB 0.30 Hz  
 GB 0  
 PC 1.00

<sup>13</sup>C NMR of compound 5c

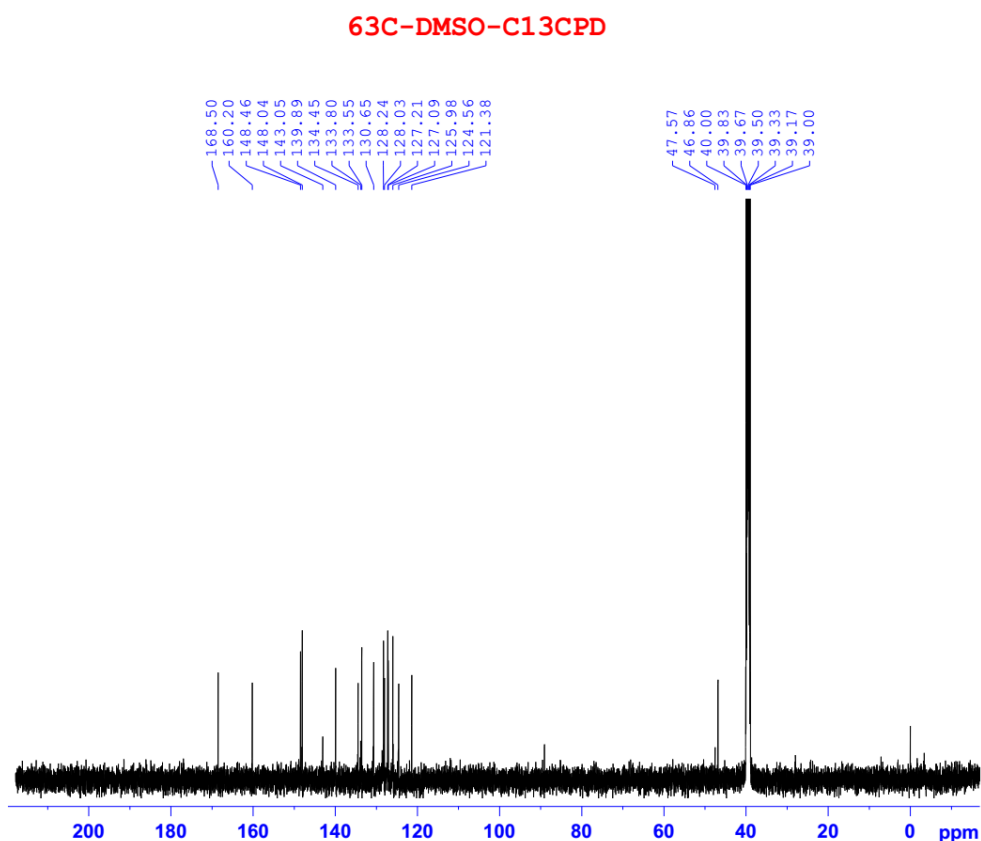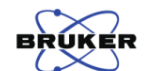

Current Data Parameters  
 NAME TUAN\_63C  
 EXPNO 2  
 PROCNO 1

F2 - Acquisition Parameters  
 Date 20170322  
 Time 2.00  
 INSTRUM spect  
 PROBHD 5 mm PABBO BB/  
 PULPROG zgpg30  
 TD 65536  
 SOLVENT DMSO  
 NS 1024  
 DS 4  
 SWH 29761.904 Hz  
 FIDRES 0.454131 Hz  
 AQ 1.1010048 sec  
 RG 198.57  
 DW 16.800 usec  
 DE 6.50 usec  
 TE 303.1 K  
 D1 2.00000000 sec  
 D11 0.03000000 sec  
 TDO 1

===== CHANNEL f1 =====  
 SFO1 125.7879670 MHz  
 NUC1 13C  
 P1 10.00 usec  
 PLW1 88.00000000 W

===== CHANNEL f2 =====  
 SFO2 500.2020008 MHz  
 NUC2 1H  
 CPDPRG[2] waltz16  
 PCPD2 80.00 usec  
 PLW2 22.00000000 W  
 PLW12 0.34375000 W  
 PLW13 0.22000000 W

F2 - Processing parameters  
 SI 32768  
 SF 125.7754570 MHz  
 WDW EM  
 SSB 0  
 LB 1.00 Hz  
 GB 0  
 PC 1.40

<sup>1</sup>H NMR of compound 5d

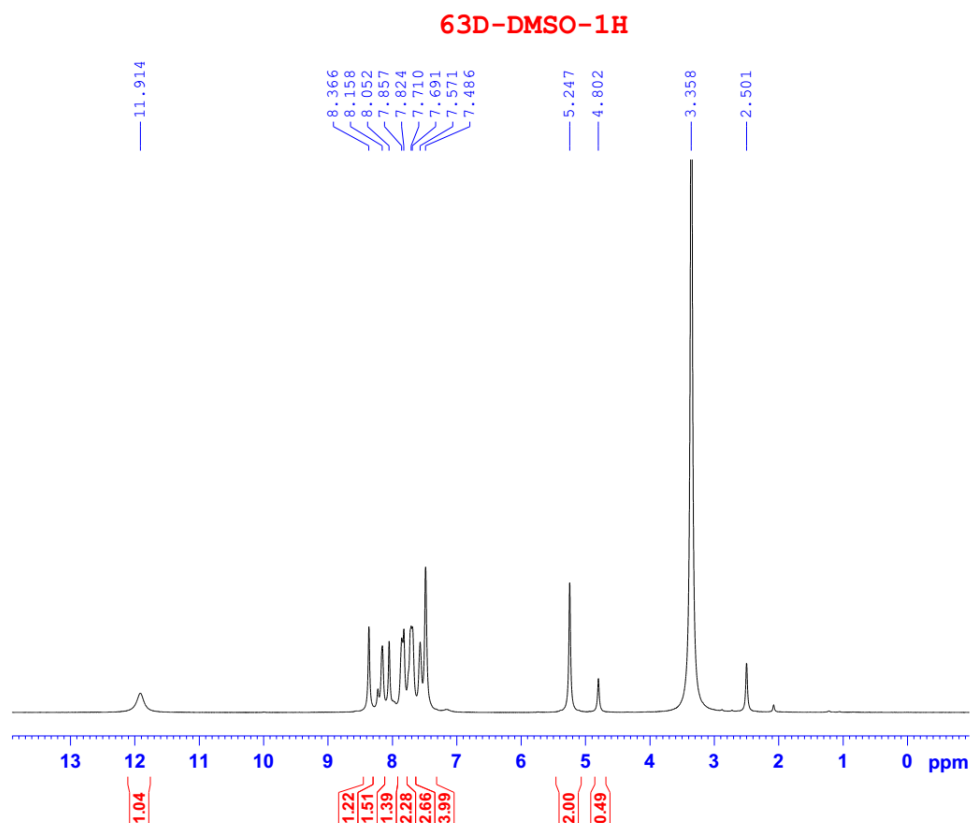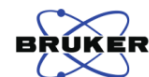

```

Current Data Parameters
NAME          TUAN_63D
EXPNO         1
PROCNO        1

F2 - Acquisition Parameters
Date_         20170412
Time_         15.51
INSTRUM       spect
PROBHD        5 mm PABBO BB/
PULPROG       zg30
TD            65536
SOLVENT       DMSO
NS            16
DS            2
SWH           10000.000 Hz
FIDRES        0.152588 Hz
AQ            3.2767999 sec
RG            79.36
DW            50.000 usec
DE            6.50 usec
TE            302.7 K
D1            1.00000000 sec
TD0           1

===== CHANNEL f1 =====
SFO1          500.2030889 MHz
NUC1           1H
P1            10.00 usec
PLW1          22.00000000 W

F2 - Processing parameters
SI            65536
SF            500.2000083 MHz
WDW           EM
SSB           0
LB            0.30 Hz
GB            0
PC            1.00
    
```

<sup>13</sup>C NMR of compound 5d

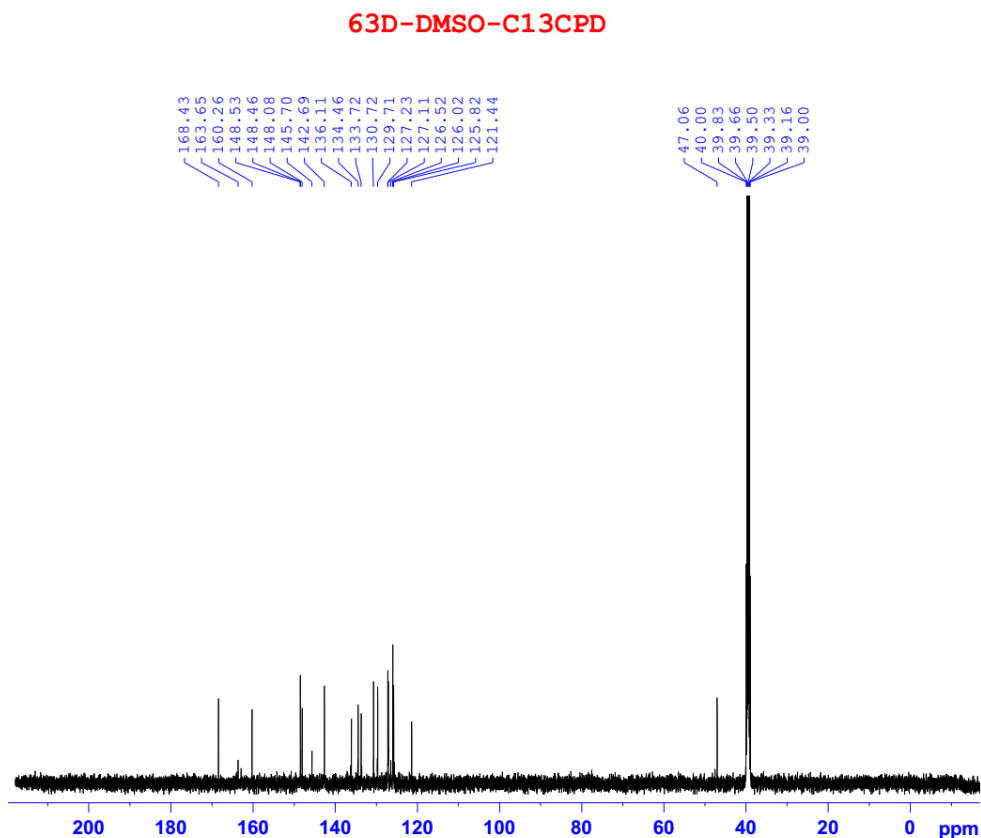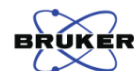

```

Current Data Parameters
NAME          TUAN_63D
EXPNO         2
PROCNO        1

F2 - Acquisition Parameters
Date_         20170414
Time_         10.06
INSTRUM       spect
PROBHD        5 mm PABBO BB/
PULPROG       zgpg30
TD            65536
SOLVENT       DMSO
NS            128
DS            4
SWH           29761.904 Hz
FIDRES        0.454131 Hz
AQ            1.1010048 sec
RG            198.57
DW            16.800 usec
DE            6.50 usec
TE            302.2 K
D1            2.00000000 sec
D11           0.03000000 sec
TD0           1

===== CHANNEL f1 =====
SFO1          125.7879670 MHz
NUC1           13C
P1            10.00 usec
PLW1          88.00000000 W

===== CHANNEL f2 =====
SFO2          500.2020008 MHz
NUC2           1H
CPDPRG[2]     waltz16
PCPD2         80.00 usec
PLW2          22.00000000 W
PLW12         0.34375000 W
PLW13         0.22000000 W

F2 - Processing parameters
SI            32768
SF            125.7754518 MHz
WDW           EM
SSB           0
LB            1.00 Hz
GB            0
PC            1.40
    
```

# <sup>1</sup>H NMR of compound 5e

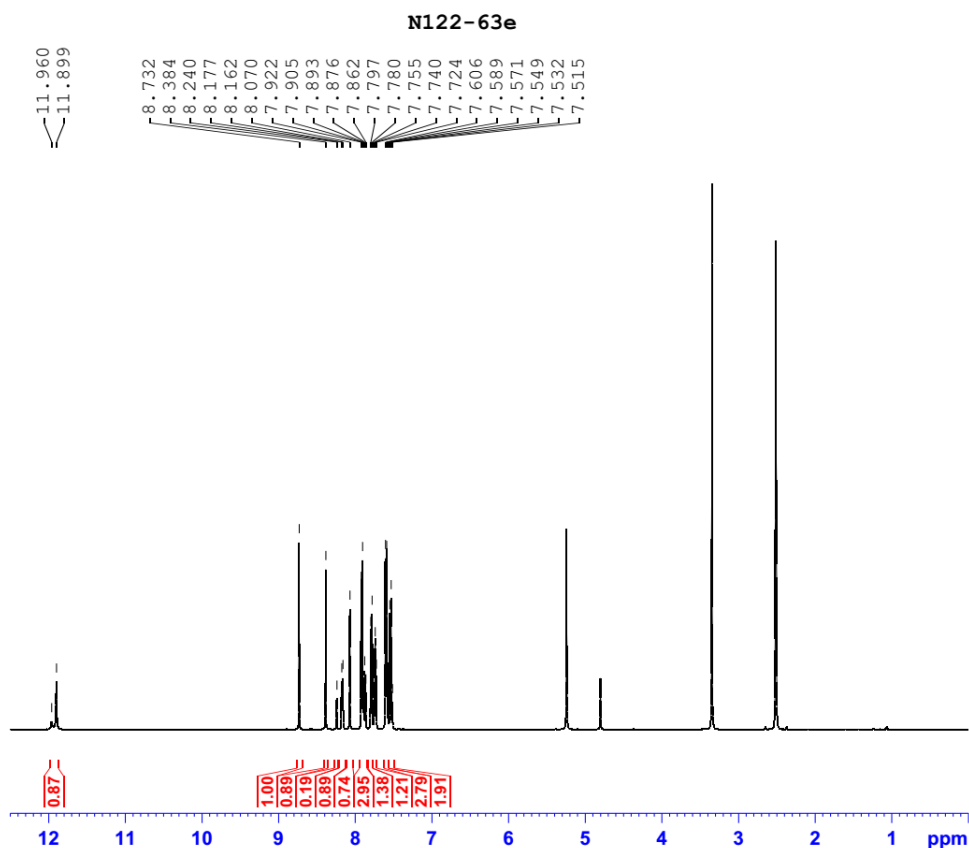

# <sup>13</sup>C NMR of compound 5e

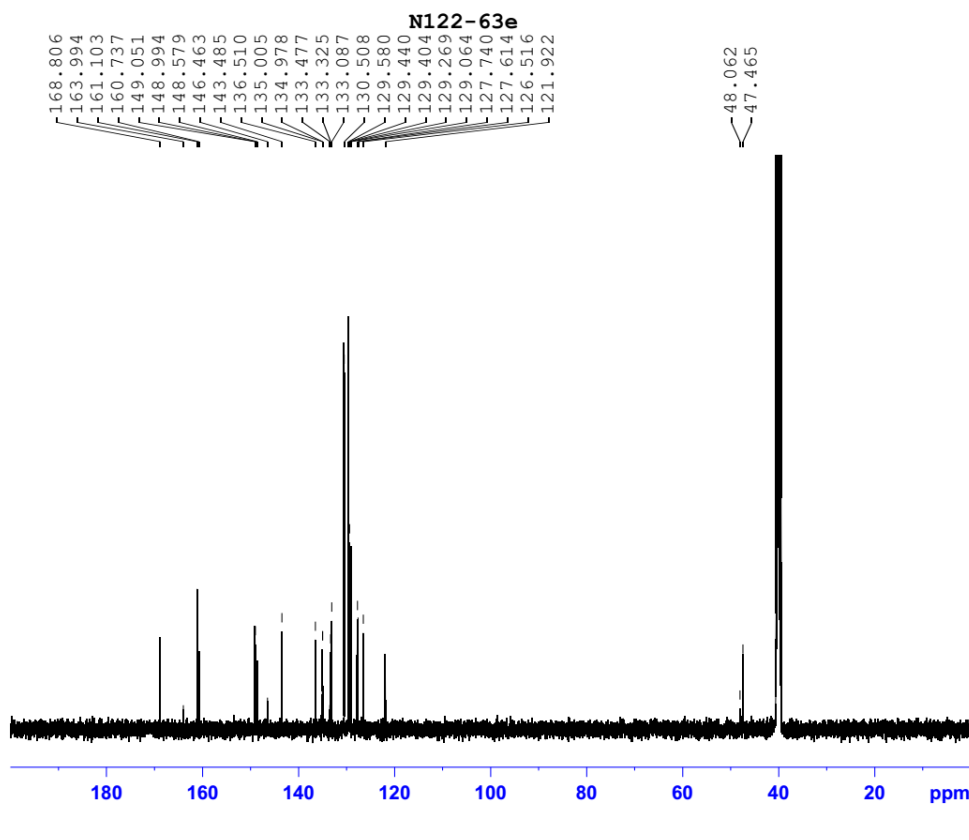

# <sup>1</sup>H NMR of compound 5f

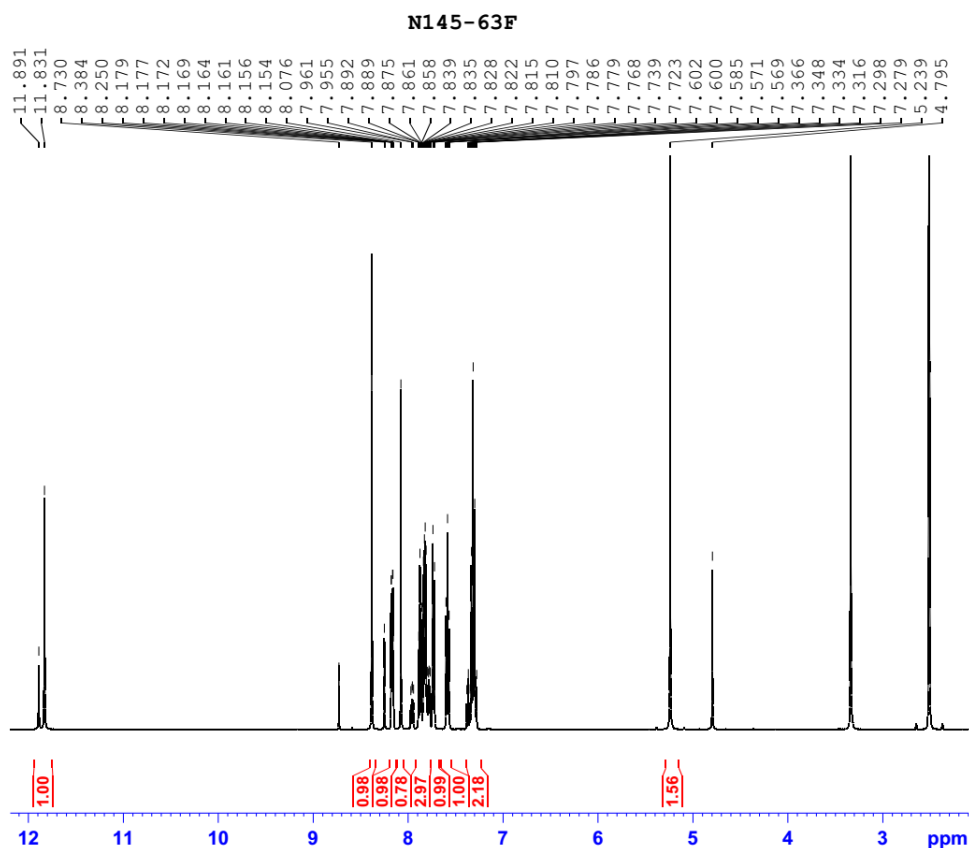

# <sup>13</sup>C NMR of compound 5f

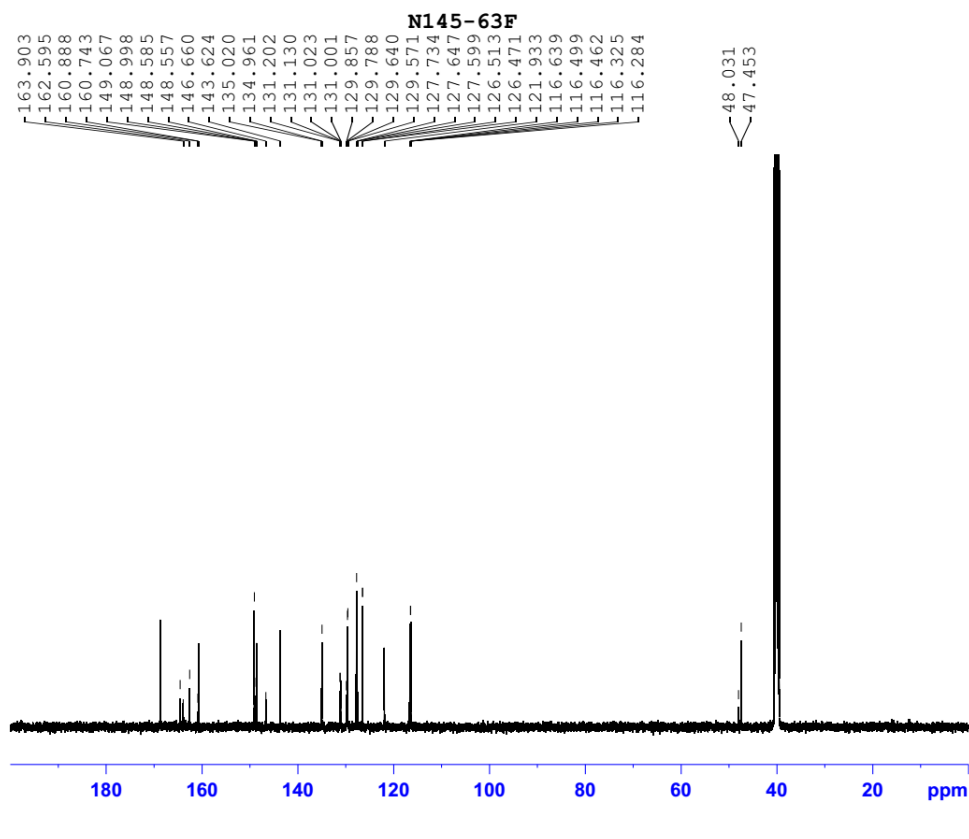



<sup>1</sup>H NMR of compound 5g

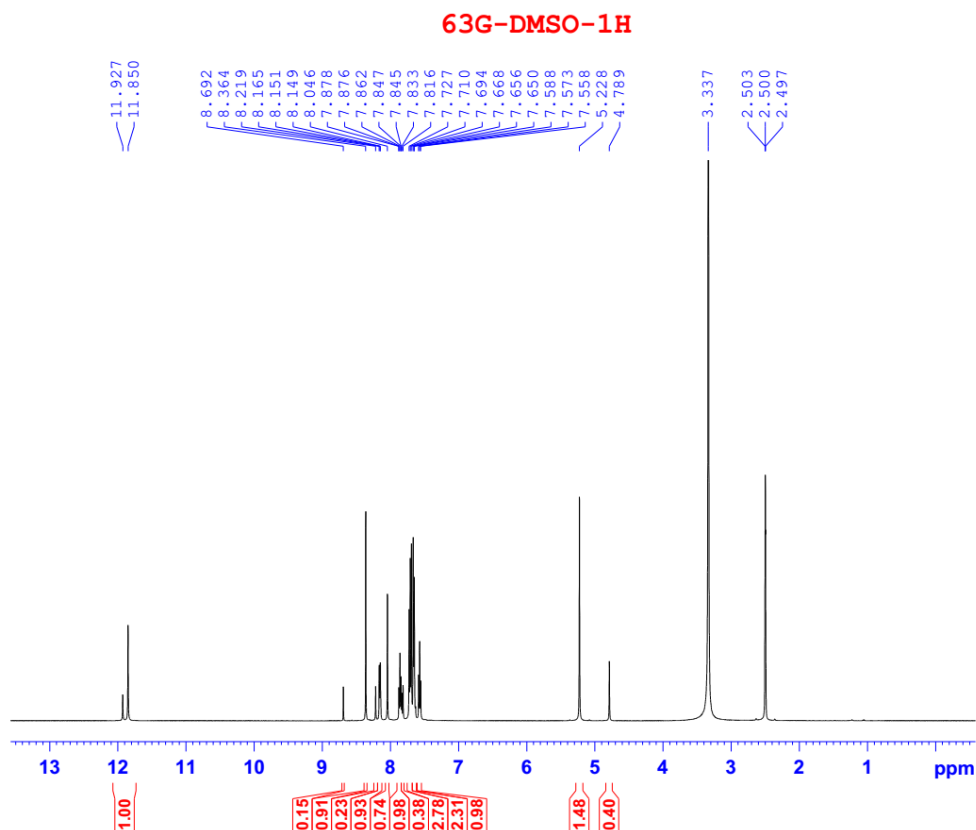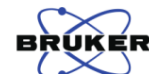

Current Data Parameters  
 NAME TUAN\_63G  
 EXPNO 1  
 PROCNO 1

F2 - Acquisition Parameters  
 Date\_ 20170308  
 Time 15.57  
 INSTRUM spect  
 PROBHD 5 mm PABBO BB/  
 PULPROG zg30  
 TD 65536  
 SOLVENT DMSO  
 NS 16  
 DS 2  
 SWH 10000.000 Hz  
 FIDRES 0.152588 Hz  
 AQ 3.2767999 sec  
 RG 97.76  
 DW 50.000 usec  
 DE 6.50 usec  
 TE 303.1 K  
 D1 1.00000000 sec  
 TD0 1

----- CHANNEL f1 -----  
 SFO1 500.2030889 MHz  
 NUC1 1H  
 P1 10.00 usec  
 PLW1 22.00000000 W

F2 - Processing parameters  
 SI 65536  
 SF 500.2000063 MHz  
 WDW EM  
 SSB 0  
 LB 0.30 Hz  
 GB 0  
 PC 1.00

<sup>13</sup>C NMR of compound 5g

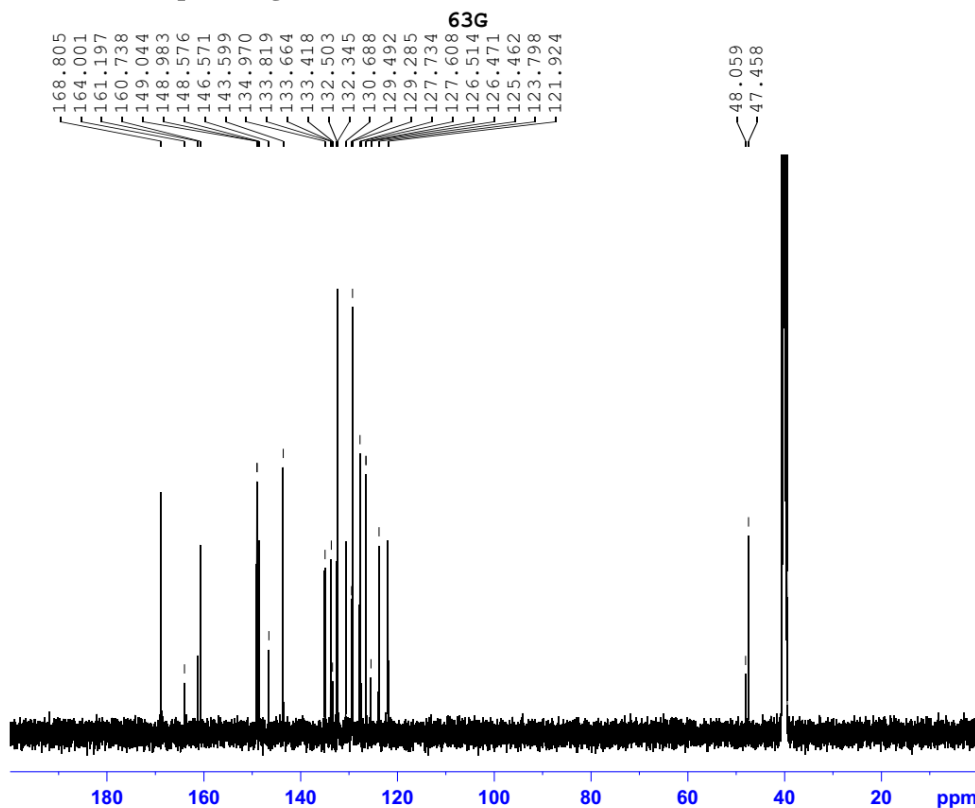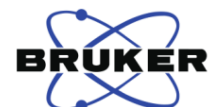

Current Data Parameters  
 NAME 63G  
 EXPNO 41  
 PROCNO 1

F2 - Acquisition Parameters  
 Date\_ 20170316  
 Time 0.05  
 INSTRUM spect  
 PROBHD 5 mm PABBO BB/  
 PULPROG zgpg30  
 TD 65536  
 SOLVENT DMSO  
 NS 2048  
 DS 4  
 SWH 31250.000 Hz  
 FIDRES 0.476837 Hz  
 AQ 1.0485760 sec  
 RG 191.38  
 DW 16.000 usec  
 DE 6.50 usec  
 TE 299.2 K  
 D1 2.00000000 sec  
 D11 0.03000000 sec  
 TD0 1

----- CHANNEL f1 -----  
 SFO1 125.7703637 MHz  
 NUC1 13C  
 P1 9.50 usec  
 PLW1 90.00000000 W

----- CHANNEL f2 -----  
 SFO2 500.1320005 MHz  
 NUC2 1H  
 CDPORG[2] waltz16  
 PCPD2 80.00 usec  
 PLW2 24.00000000 W  
 PLW12 0.36015001 W  
 PLW13 0.23050000 W

F2 - Processing parameters  
 SI 65536  
 SF 125.7577885 MHz  
 WDW EM  
 SSB 0  
 LB 1.00 Hz  
 GB 0  
 PC 1.40

# <sup>1</sup>H NMR of compound 5h

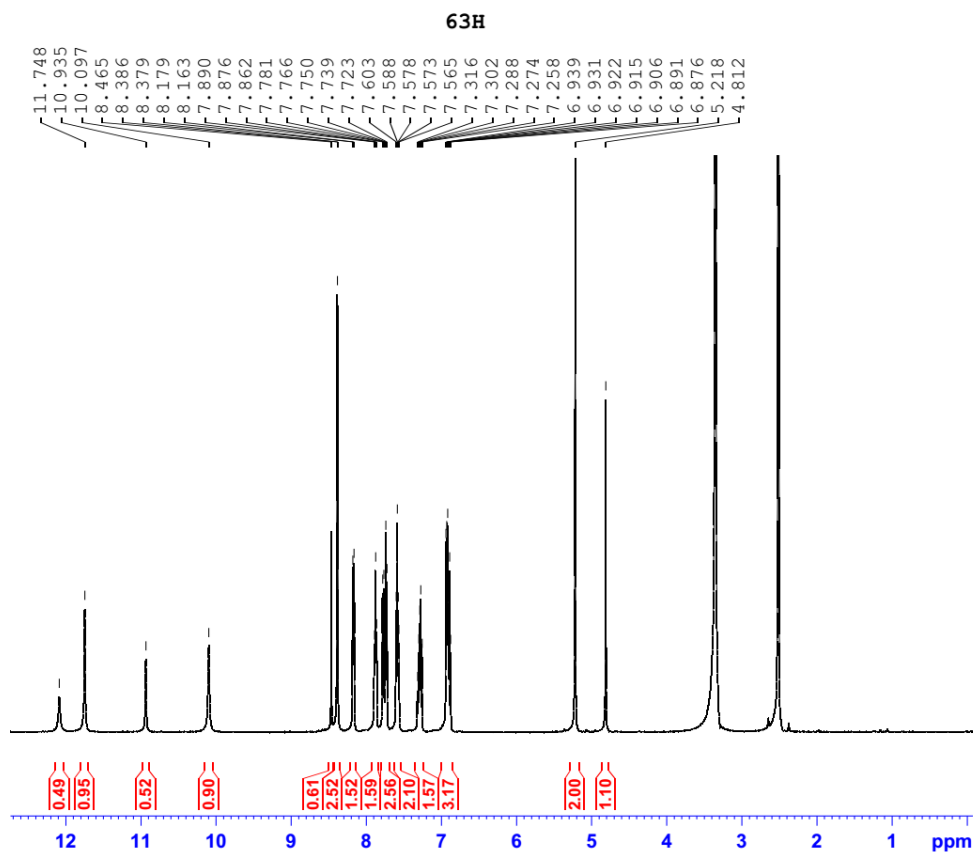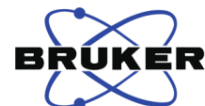

```

Current Data Parameters
NAME      N220 - 63H
EXPNO    10
PROCNO   1

F2 - Acquisition Parameters
Date_    20170727
Time     15.36
INSTRUM  spect
PROBHD   5 mm PABBO BB/
PULPROG  zg30
TD       65536
SOLVENT  DMSO
NS       16
DS       2
SWH      10000.000 Hz
FIDRES   0.152588 Hz
AQ       3.2767999 sec
RG       191.38
DW       50.000 usec
DE       6.50 usec
TE       297.6 K
D1       1.00000000 sec
TD0      1

===== CHANNEL f1 =====
SFO1    500.1330885 MHz
NUC1    1H
F1      9.80 usec
PLW1    24.00000000 W

F2 - Processing parameters
SI      65536
SF      500.1300000 MHz
WDW     EM
SSB     0
LB      0.30 Hz
GB      0
PC      1.00
    
```

# <sup>13</sup>C NMR of compound 5h

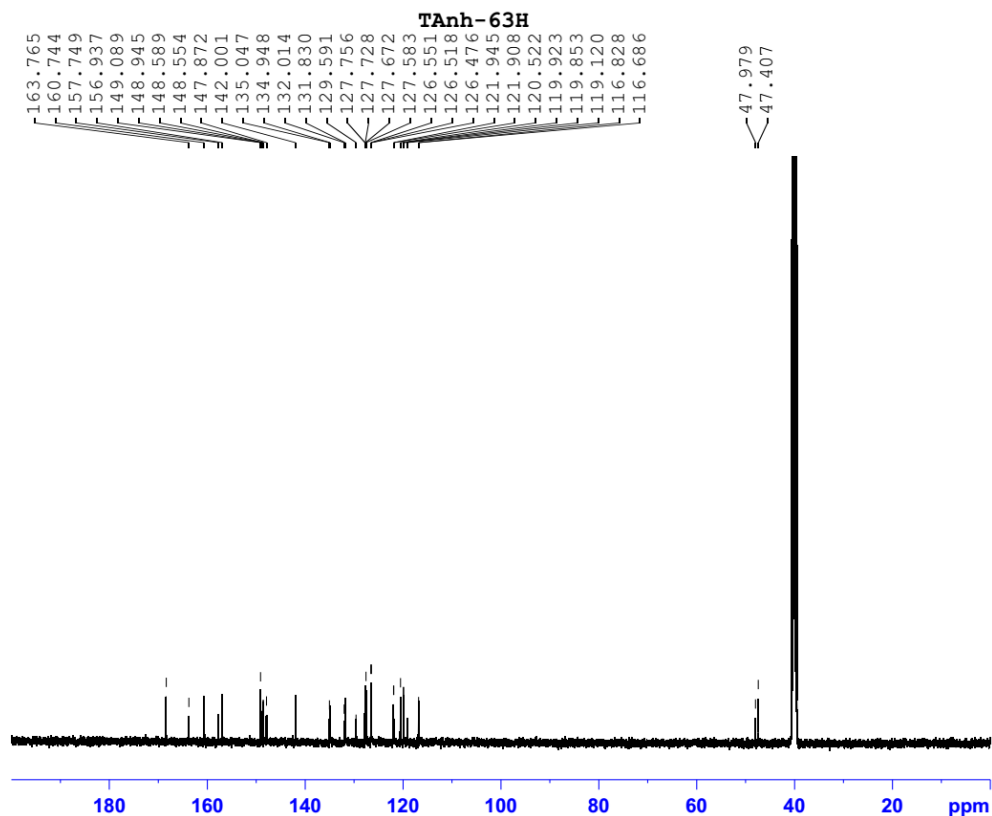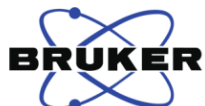

```

Current Data Parameters
NAME      TAnh-63H
EXPNO    11
PROCNO   1

F2 - Acquisition Parameters
Date_    20171005
Time     21.50
INSTRUM  spect
PROBHD   5 mm PABBO BB/
PULPROG  zgpg30
TD       65536
SOLVENT  DMSO
NS       2048
DS       4
SWH      31250.000 Hz
FIDRES   0.476837 Hz
AQ       1.0485760 sec
RG       191.38
DW       16.000 usec
DE       6.50 usec
TE       299.0 K
D1       2.00000000 sec
D11      0.03000000 sec
TD0      1

===== CHANNEL f1 =====
SFO1    125.7703637 MHz
NUC1    13C
P1      9.50 usec
PLW1    90.00000000 W

===== CHANNEL f2 =====
SFO2    500.1320005 MHz
NUC2    1H
CPDPRG[2] waltz16
PCPD2   80.00 usec
PLW2    24.00000000 W
PLW12   0.36015001 W
PLW13   0.23050000 W

F2 - Processing parameters
SI      65536
SF      125.7577885 MHz
WDW     EM
SSB     0
LB      1.00 Hz
GB      0
PC      1.40
    
```

# <sup>1</sup>H NMR of compound 5i

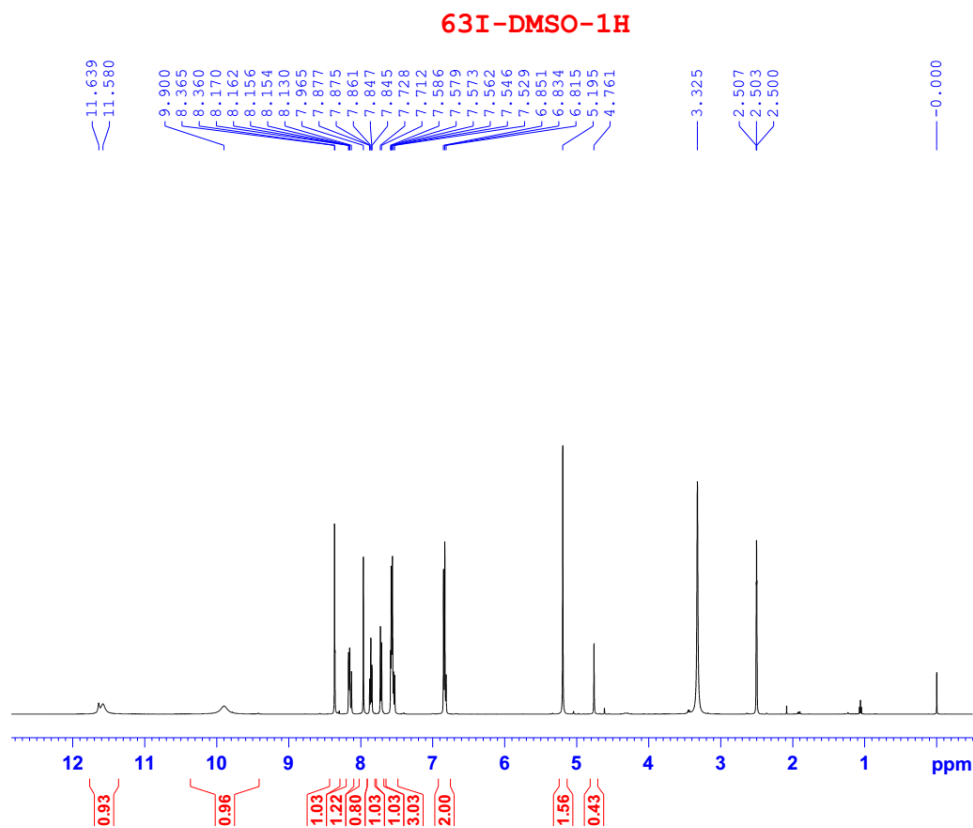

# <sup>13</sup>C NMR of compound 5i

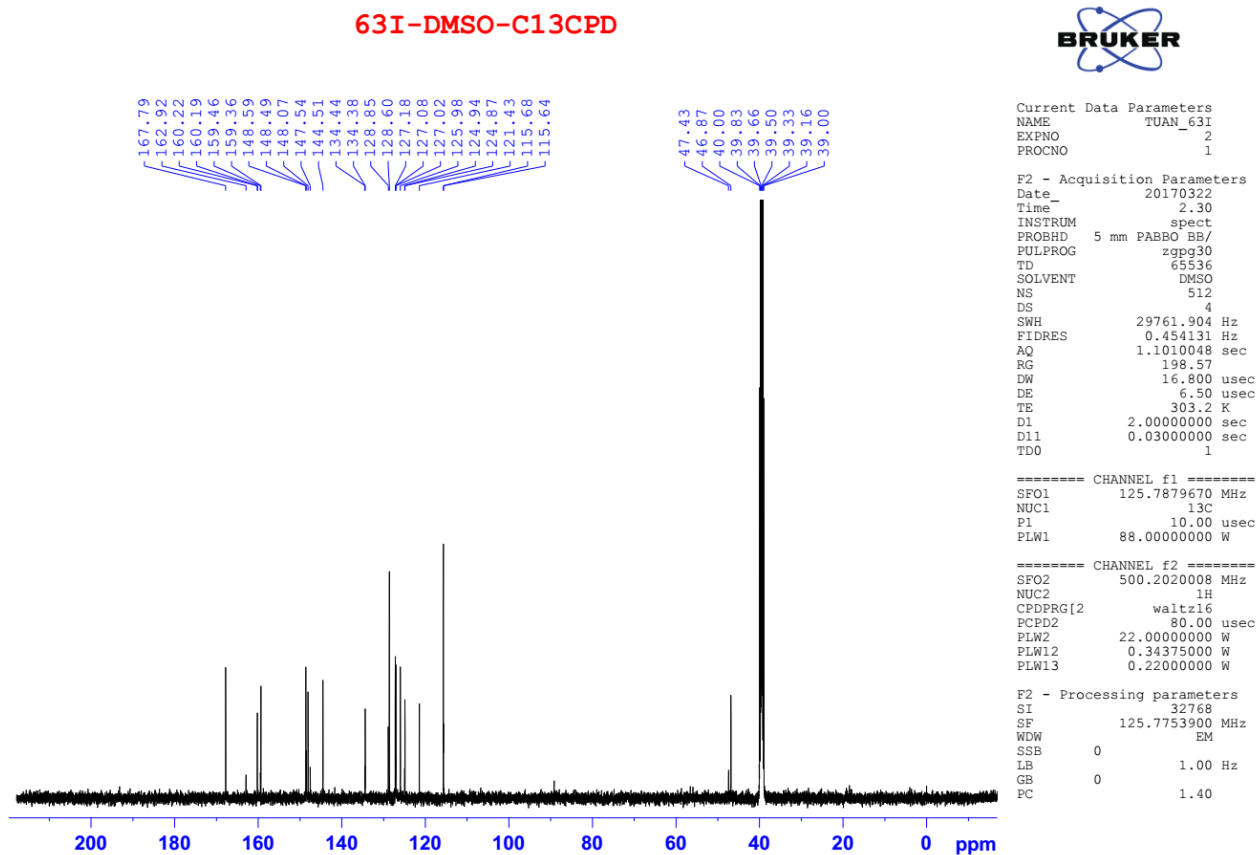

# <sup>1</sup>H NMR of compound 5j

63J-DMSO-1H

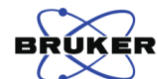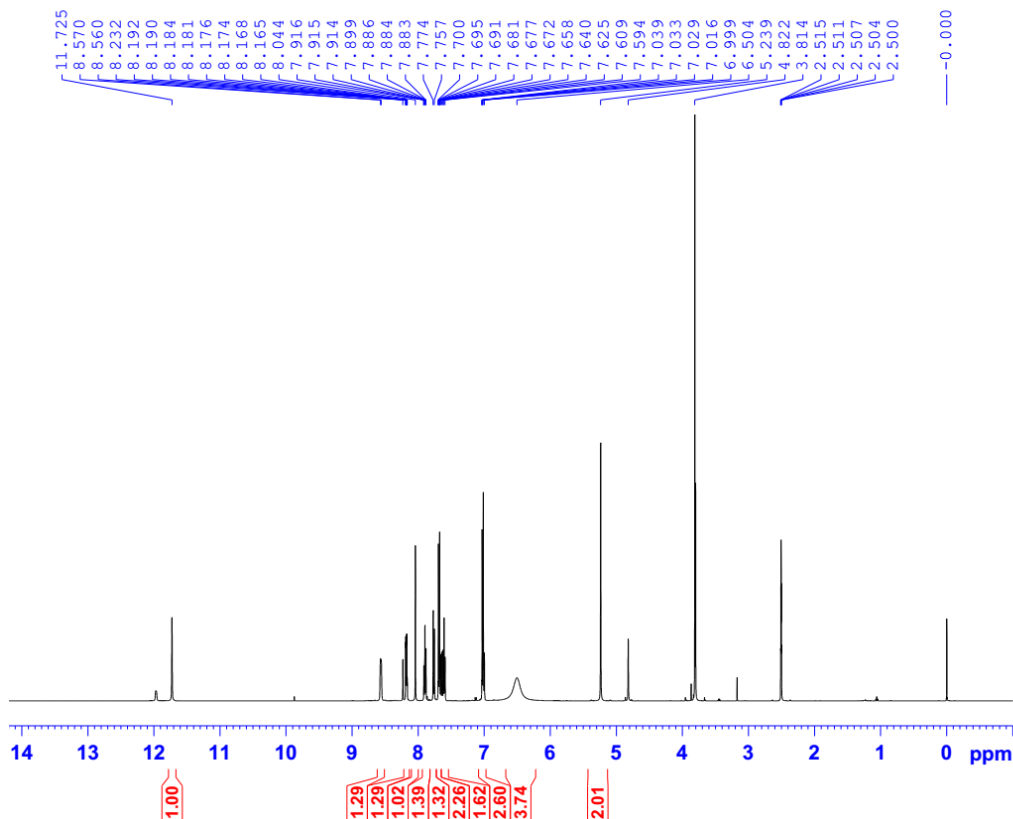

Current Data Parameters  
 NAME TUAN63J  
 EXPNO 1  
 PROCNO 1

F2 - Acquisition Parameters  
 Date\_ 20170223  
 Time 11.10  
 INSTRUM spect  
 PROBHD 5 mm PABBO BB/  
 PULPROG zg30  
 TD 65536  
 SOLVENT DMSO  
 NS 16  
 DS 2  
 SWH 10000.000 Hz  
 FIDRES 0.152588 Hz  
 AQ 3.2767999 sec  
 RG 127.68  
 DW 50.000 usec  
 DE 6.50 usec  
 TE 303.2 K  
 D1 1.00000000 sec  
 TD0 1

===== CHANNEL f1 =====  
 SFO1 500.2030889 MHz  
 NUC1 1H  
 P1 10.00 usec  
 PLW1 22.00000000 W

F2 - Processing parameters  
 SI 65536  
 SF 500.2000013 MHz  
 WDW EM  
 SSB 0  
 LB 0.30 Hz  
 GB 0  
 PC 1.00

<sup>13</sup>C NMR of compound 5j

63J-DMSO-C13CPD

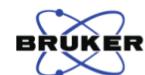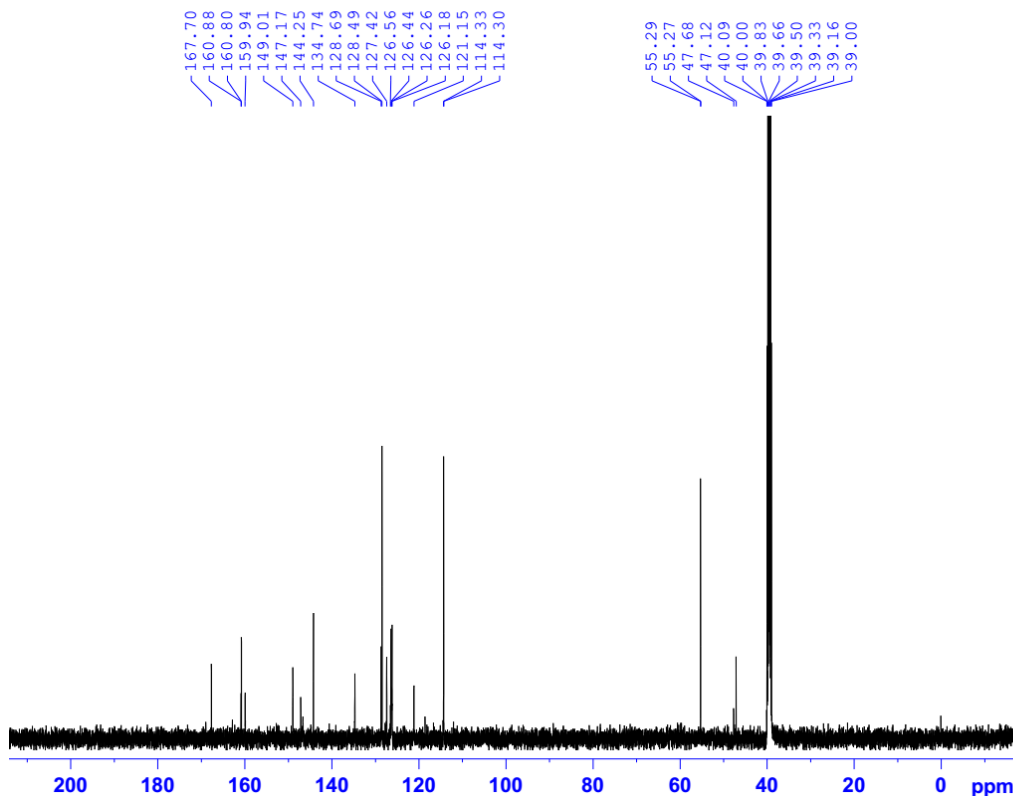

Current Data Parameters  
 NAME TUAN63J  
 EXPNO 2  
 PROCNO 1

F2 - Acquisition Parameters  
 Date\_ 20170223  
 Time 15.44  
 INSTRUM spect  
 PROBHD 5 mm PABBO BB/  
 PULPROG zgpg30  
 TD 65536  
 SOLVENT DMSO  
 NS 256  
 DS 4  
 SWH 29761.904 Hz  
 FIDRES 0.454131 Hz  
 AQ 1.1010048 sec  
 RG 198.57  
 DW 16.800 usec  
 DE 6.50 usec  
 TE 303.2 K  
 D1 2.00000000 sec  
 D11 0.03000000 sec  
 TD0 1

===== CHANNEL f1 =====  
 SFO1 125.7879670 MHz  
 NUC1 13C  
 P1 10.00 usec  
 PLW1 88.00000000 W

===== CHANNEL f2 =====  
 SFO2 500.2020008 MHz  
 NUC2 1H  
 CPDPRG12 waltz16  
 PCPD2 80.00 usec  
 PLW2 22.00000000 W  
 PLW12 0.34375000 W  
 PLW13 0.22000000 W

F2 - Processing parameters  
 SI 32768  
 SF 125.7754547 MHz  
 WDW EM  
 SSB 0  
 LB 1.00 Hz  
 GB 0  
 PC 1.40

<sup>1</sup>H NMR of compound 5k

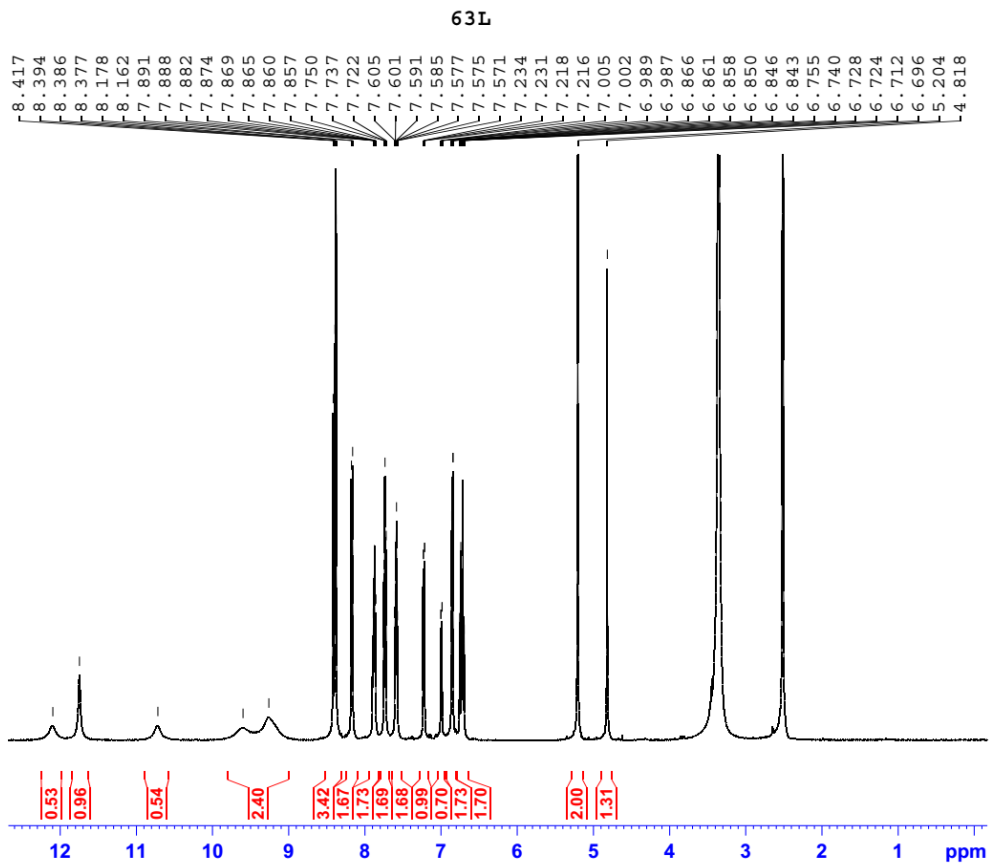

**<sup>13</sup>C NMR of compound 5k**

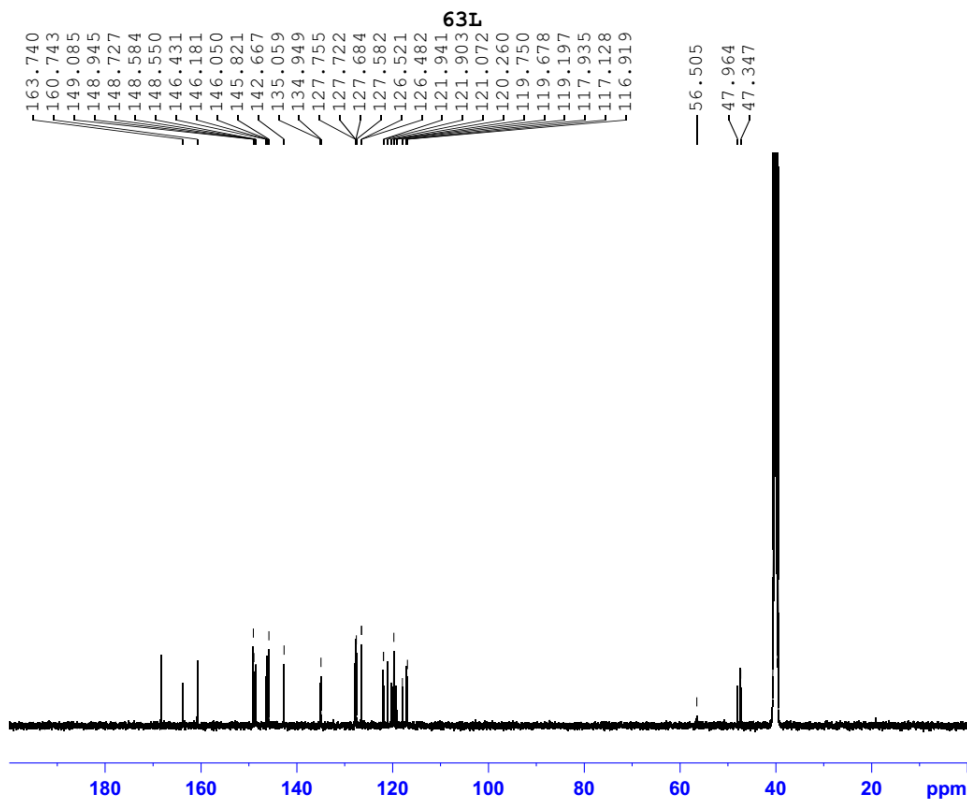

**<sup>1</sup>H NMR of compound 5l**

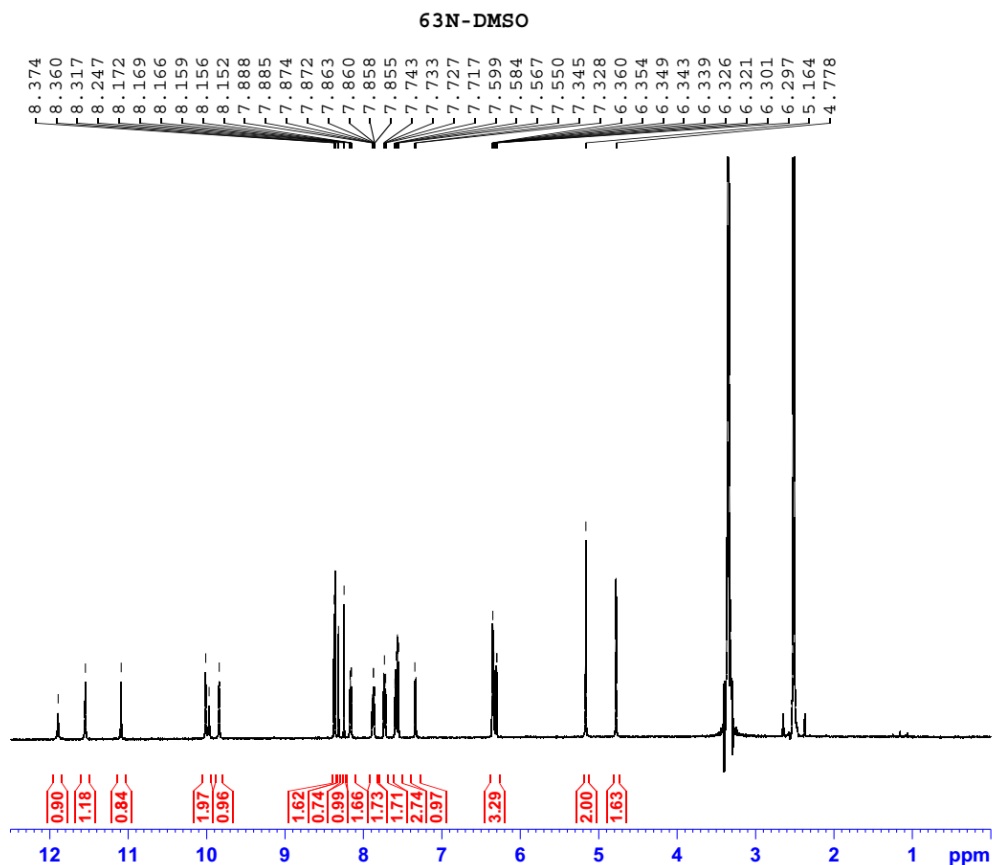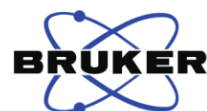

Current Data Parameters  
 NAME 63N-DMSO  
 EXPNO 10  
 PROCNO 1

F2 - Acquisition Parameters  
 Date\_ 20170726  
 Time 14.04  
 INSTRUM spect  
 PROBHD 5 mm PABBO BB/  
 PULPROG zg30  
 TD 65536  
 SOLVENT DMSO  
 NS 16  
 DS 2  
 SWH 10000.000 Hz  
 FIDRES 0.152588 Hz  
 AQ 3.2767999 sec  
 RG 191.38  
 DW 50.000 usec  
 DE 6.50 usec  
 TE 297.5 K  
 D1 1.00000000 sec  
 TD0 1

===== CHANNEL f1 =====  
 SFO1 500.1330885 MHz  
 NUC1 1H  
 P1 9.80 usec  
 PLW1 24.00000000 W

F2 - Processing parameters  
 SI 65536  
 SF 500.1330000 MHz  
 WDW EM  
 SSB 0  
 LB 0.30 Hz  
 GB 0  
 PC 1.00

**<sup>13</sup>C NMR of compound 5l**

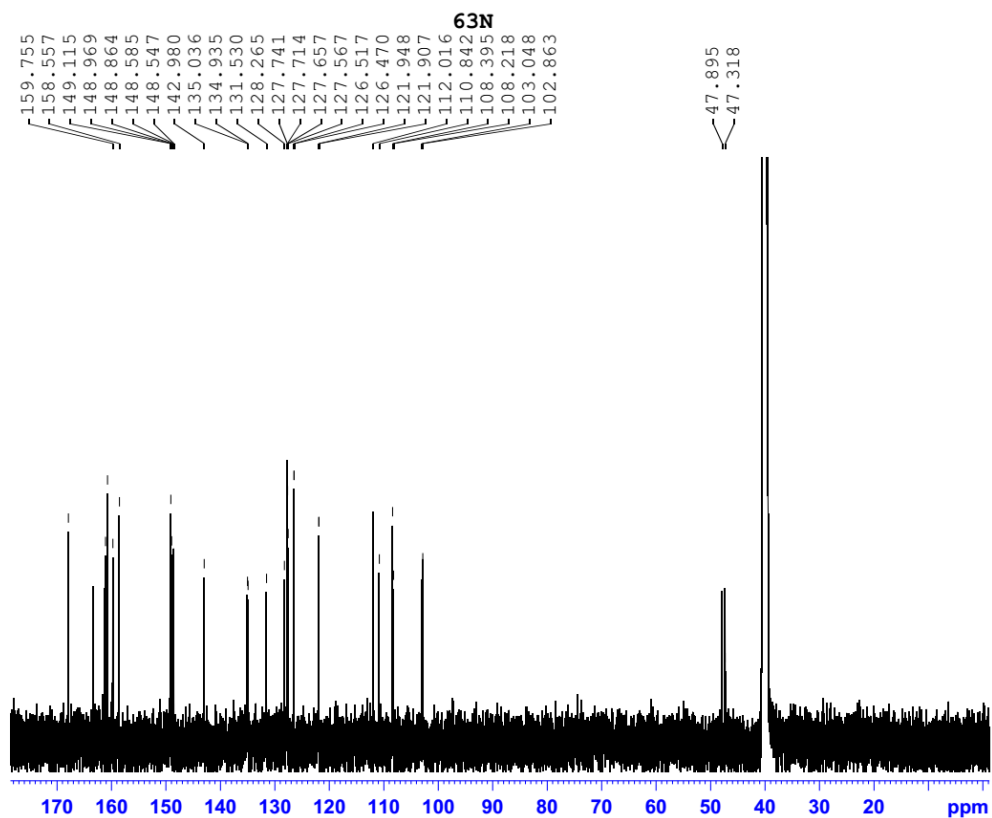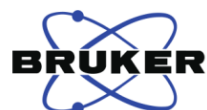

Current Data Parameters  
 NAME 63N-DMSO  
 EXPNO 20  
 PROCNO 1

F2 - Acquisition Parameters  
 Date\_ 20170728  
 Time 1.38  
 INSTRUM spect  
 PROBHD 5 mm PABBO BB/  
 PULPROG zgpg30  
 TD 65536  
 SOLVENT DMSO  
 NS 8192  
 DS 4  
 SWH 31250.000 Hz  
 FIDRES 0.476837 Hz  
 AQ 1.0485760 sec  
 RG 191.38  
 DW 16.000 usec  
 DE 6.50 usec  
 TE 298.8 K  
 D1 2.00000000 sec  
 D11 0.03000000 sec  
 TD0 1

===== CHANNEL f1 =====  
 SFO1 125.7703637 MHz  
 NUC1 13C  
 P1 9.50 usec  
 PLW1 90.00000000 W

===== CHANNEL f2 =====  
 SFO2 500.1320005 MHz  
 NUC2 1H  
 CPDPRG[2] waltz16  
 PCPD2 80.00 usec  
 PLW2 24.00000000 W  
 PLW12 0.36015001 W  
 PLW13 0.23050000 W

F2 - Processing parameters  
 SI 65536  
 SF 125.7577885 MHz  
 WDW EM  
 SSB 0  
 LB 1.00 Hz  
 GB 0  
 PC 1.40

**<sup>1</sup>H NMR of compound 5m**

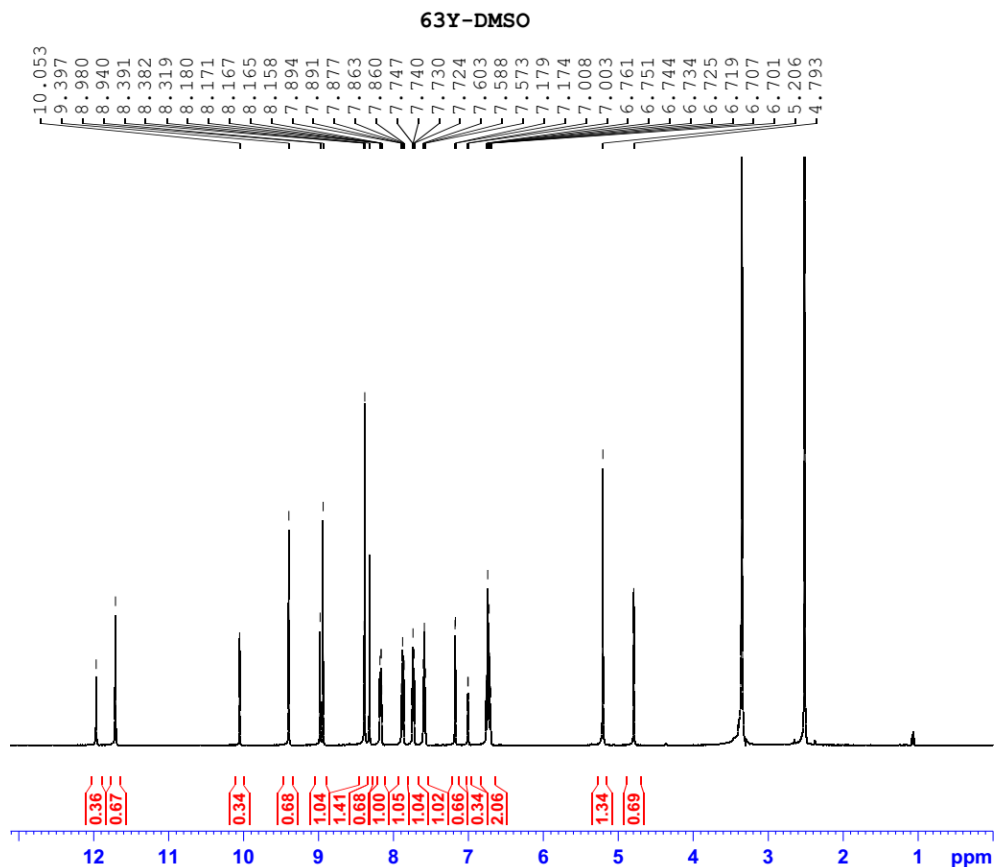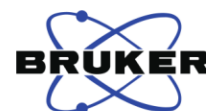

**<sup>13</sup>C NMR of compound 5m**

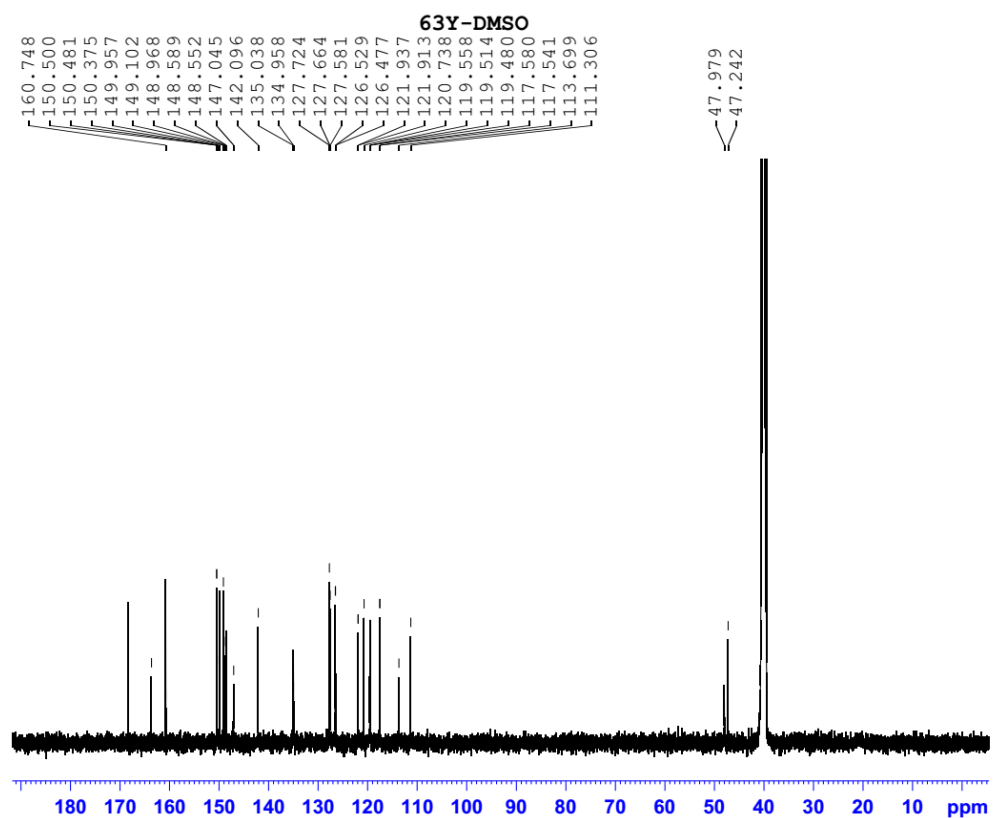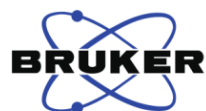

**<sup>1</sup>H NMR of compound 5n**

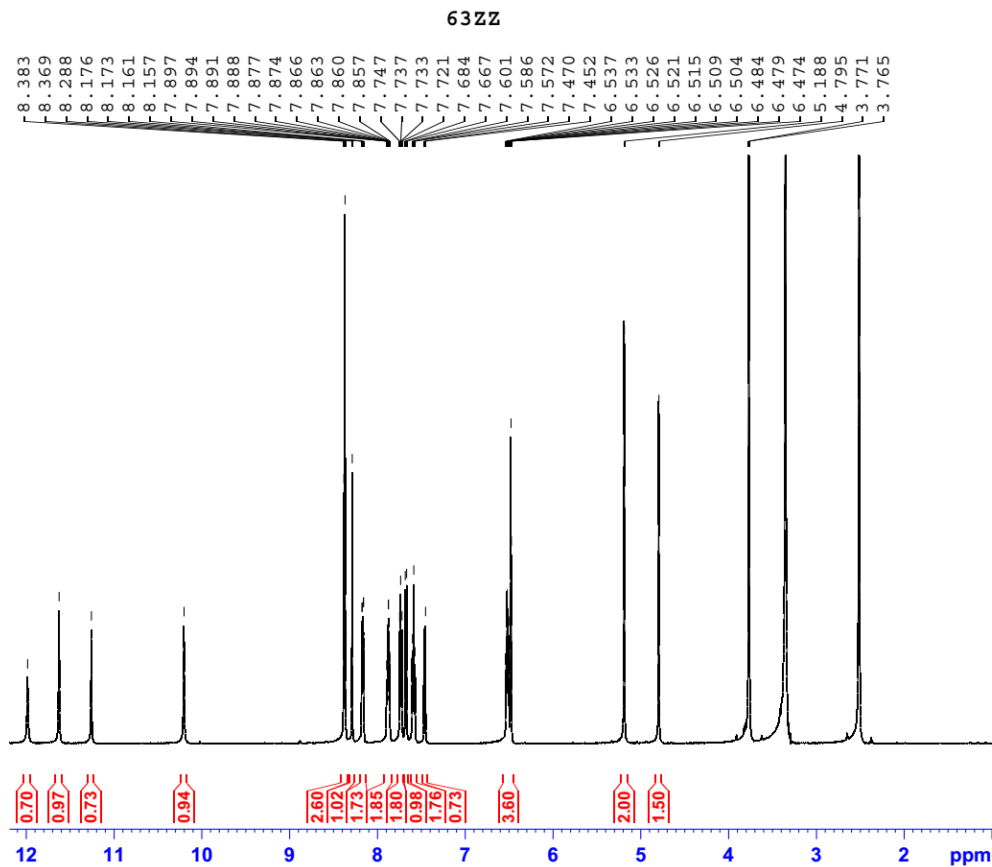

**<sup>13</sup>C NMR of compound 5n**

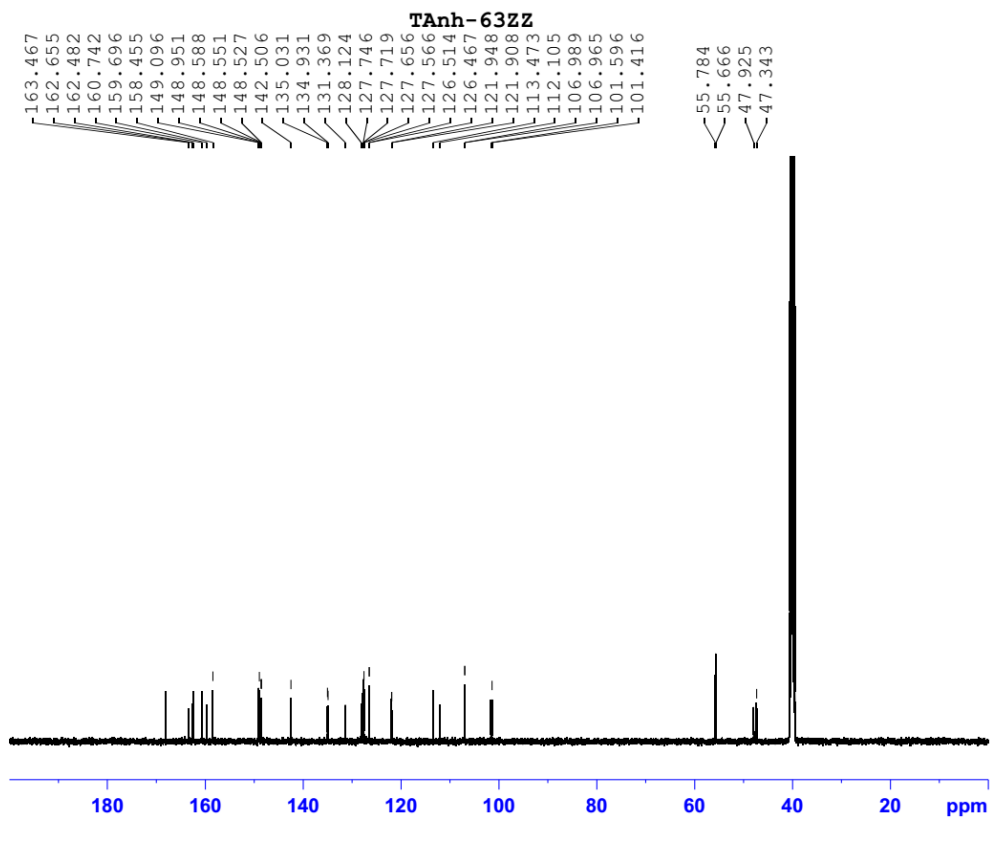



<sup>1</sup>H NMR of compound 5o

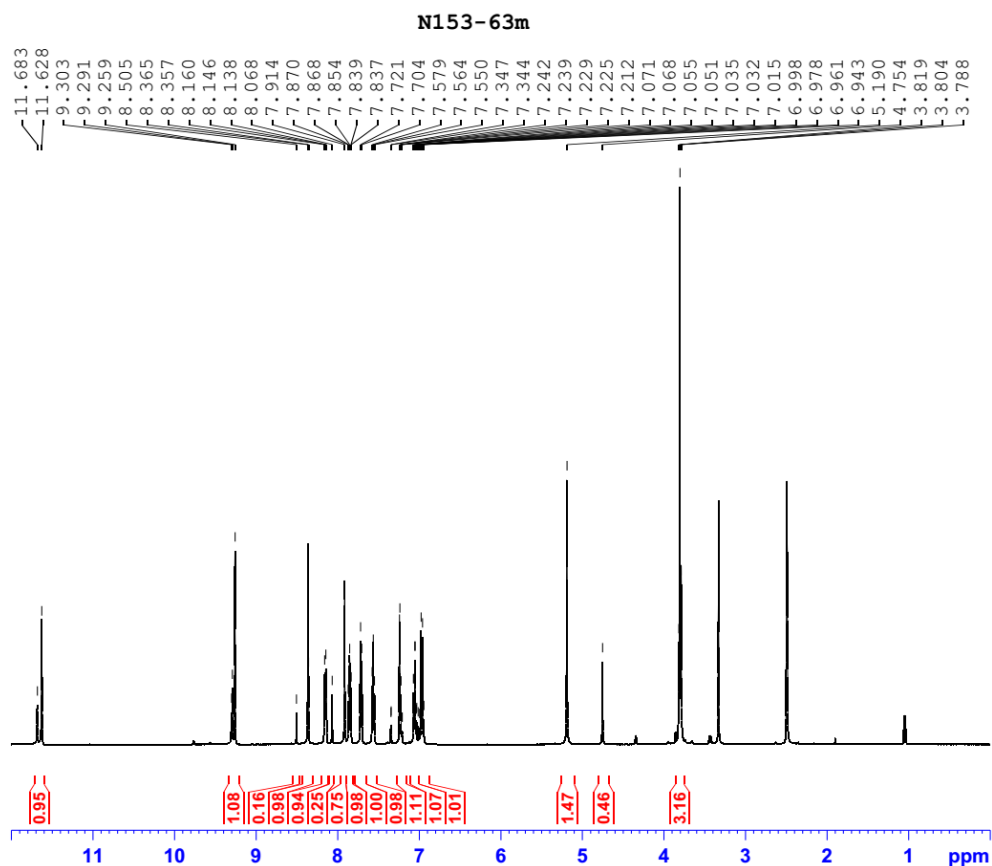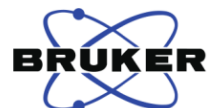

Current Data Parameters  
 NAME N153-63m  
 EXPNO 30  
 PROCNO 1

F2 - Acquisition Parameters  
 Date\_ 20170518  
 Time\_ 0.51  
 INSTRUM spect  
 PROBHD 5 mm PABBO BB/  
 PULPROG zg30  
 TD 65536  
 SOLVENT DMSO  
 NS 16  
 DS 2  
 SWH 10000.000 Hz  
 FIDRES 0.152588 Hz  
 AQ 3.2767999 sec  
 RG 123.67  
 DW 50.000 usec  
 DE 6.50 usec  
 TE 297.8 K  
 D1 1.00000000 sec  
 TD0 1

===== CHANNEL f1 =====  
 SFO1 500.1330885 MHz  
 NUC1 1H  
 P1 9.80 usec  
 PLW1 24.00000000 W

F2 - Processing parameters  
 SI 65536  
 SF 500.1300104 MHz  
 WDW EM  
 SSB 0  
 LB 0.30 Hz  
 GB 0  
 PC 1.00

<sup>13</sup>C NMR of compound 5o

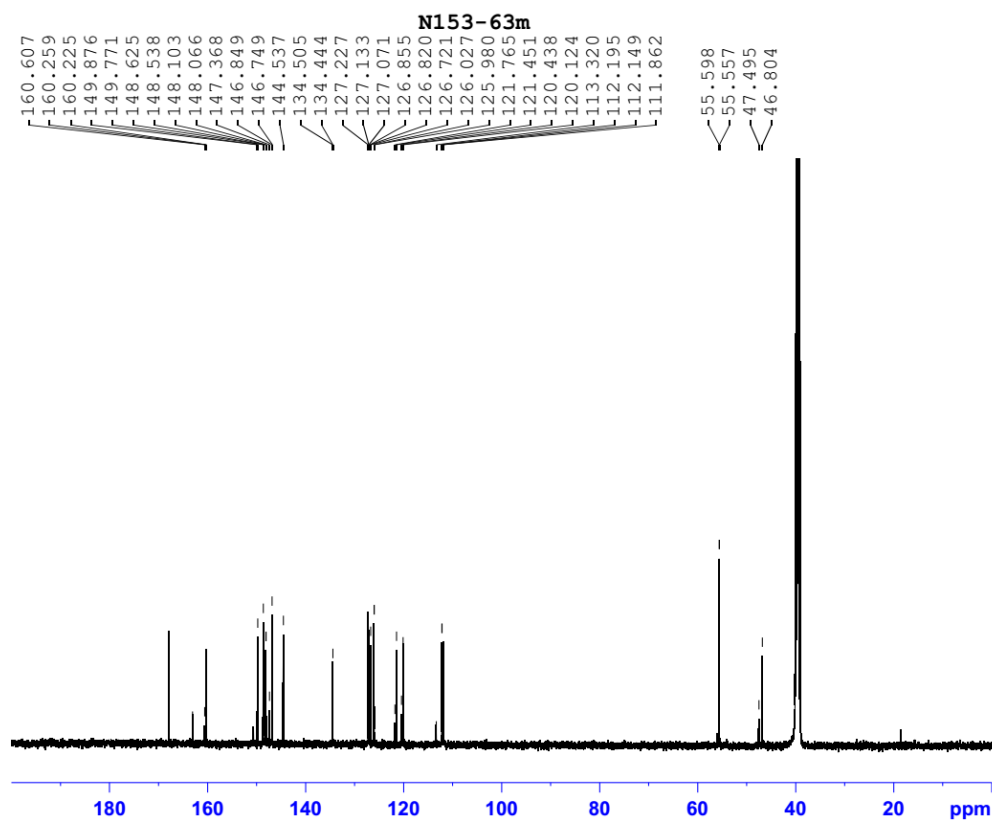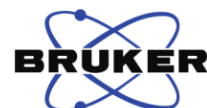

Current Data Parameters  
 NAME N153-63m  
 EXPNO 32  
 PROCNO 1

F2 - Acquisition Parameters  
 Date\_ 20170518  
 Time\_ 2.38  
 INSTRUM spect  
 PROBHD 5 mm PABBO BB/  
 PULPROG zgpg30  
 TD 65536  
 SOLVENT DMSO  
 NS 2048  
 DS 4  
 SWH 31250.000 Hz  
 FIDRES 0.476837 Hz  
 AQ 1.0485760 sec  
 RG 191.38  
 DW 16.000 usec  
 DE 6.50 usec  
 TE 298.8 K  
 D1 2.00000000 sec  
 D11 0.03000000 sec  
 TD0 1

===== CHANNEL f1 =====  
 SFO1 125.7703637 MHz  
 NUC1 13C  
 P1 9.50 usec  
 PLW1 90.00000000 W

===== CHANNEL f2 =====  
 SFO2 500.1320005 MHz  
 NUC2 1H  
 CPDPRG[2] waltz16  
 PCPD2 80.00 usec  
 PLW2 24.00000000 W  
 PLW12 0.36015001 W  
 PLW13 0.23050000 W

F2 - Processing parameters  
 SI 65536  
 SF 125.7578510 MHz  
 WDW EM  
 SSB 0  
 LB 1.00 Hz  
 GB 0  
 PC 1.40

<sup>1</sup>H NMR of compound 5p

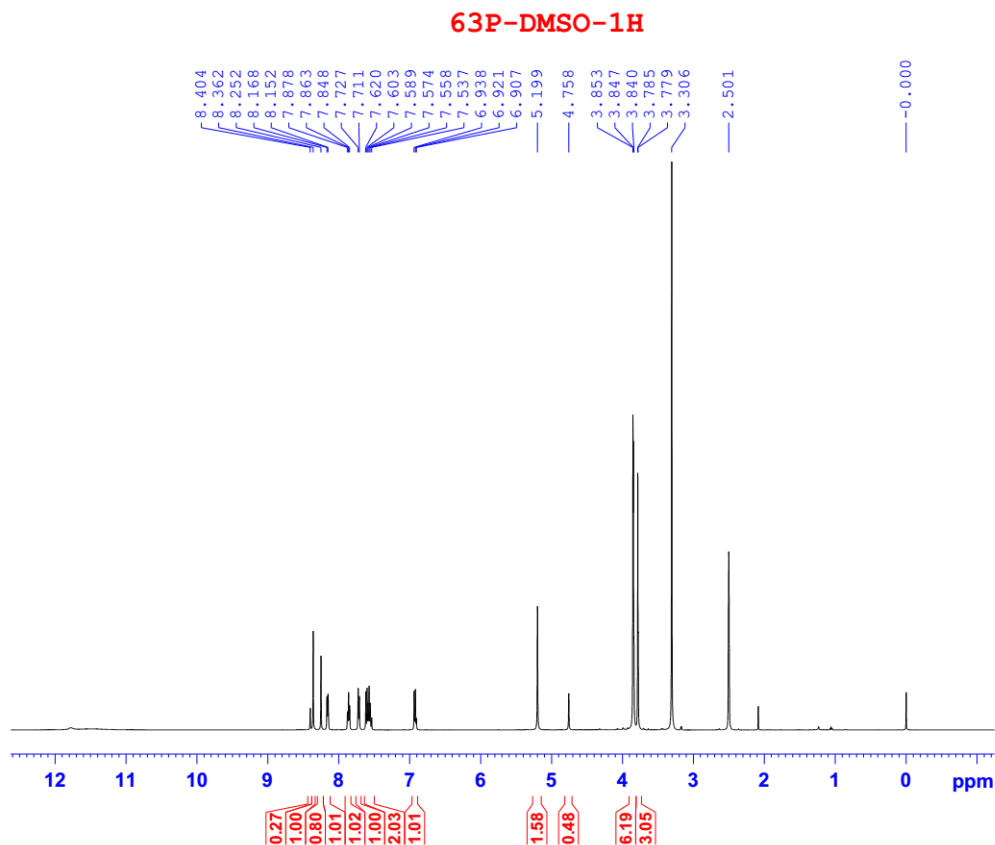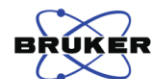

Current Data Parameters  
 NAME TUAN\_63P  
 EXPNO 1  
 PROCNO 1

F2 - Acquisition Parameters  
 Date\_ 20170321  
 Time 16.27  
 INSTRUM spect  
 PROBHD 5 mm PABBO BB/  
 PULPROG zg30  
 TD 65536  
 SOLVENT DMSO  
 NS 16  
 DS 2  
 SWH 10000.000 Hz  
 FIDRES 0.152588 Hz  
 AQ 3.2767999 sec  
 RG 142.98  
 DW 50.000 usec  
 DE 6.50 usec  
 TE 303.2 K  
 D1 1.00000000 sec  
 TDO 1

===== CHANNEL f1 =====  
 SF01 500.2030889 MHz  
 NUC1 1H  
 P1 10.00 usec  
 PLW1 22.00000000 W

F2 - Processing parameters  
 SI 65536  
 SF 500.2000047 MHz  
 WDW EM  
 SSB 0  
 LB 0.30 Hz  
 GB 0  
 PC 1.00

<sup>13</sup>C NMR of compound 5p

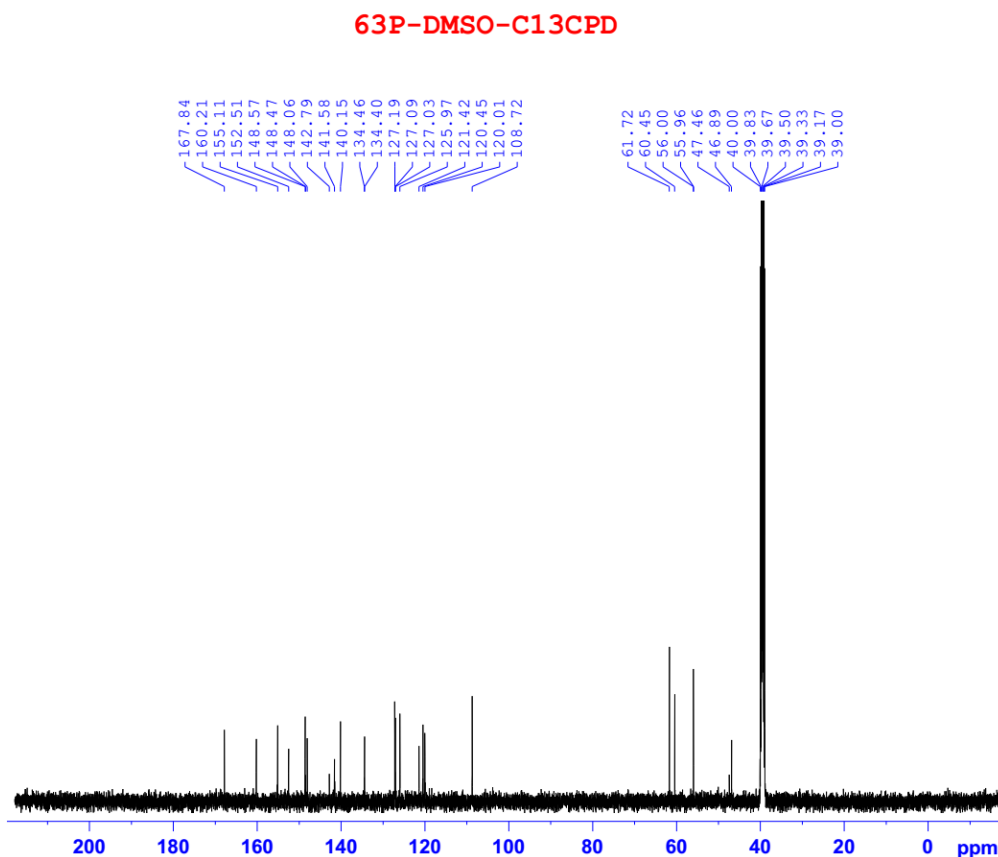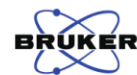

Current Data Parameters  
 NAME TUAN\_63P  
 EXPNO 2  
 PROCNO 1

F2 - Acquisition Parameters  
 Date\_ 20170322  
 Time 3.00  
 INSTRUM spect  
 PROBHD 5 mm PABBO BB/  
 PULPROG zgpg30  
 TD 65536  
 SOLVENT DMSO  
 NS 512  
 DS 4  
 SWH 29761.904 Hz  
 FIDRES 0.454131 Hz  
 AQ 1.1010048 sec  
 RG 198.57  
 DW 16.800 usec  
 DE 6.50 usec  
 TE 303.1 K  
 D1 2.00000000 sec  
 D11 0.03000000 sec  
 TDO 1

===== CHANNEL f1 =====  
 SF01 125.7879670 MHz  
 NUC1 13C  
 P1 10.00 usec  
 PLW1 88.00000000 W

===== CHANNEL f2 =====  
 SF02 500.2020008 MHz  
 NUC2 1H  
 CPDPRG[2] waltz16  
 PCPD2 80.00 usec  
 PLW2 22.00000000 W  
 PLW12 0.34375000 W  
 PLW13 0.22000000 W

F2 - Processing parameters  
 SI 32768  
 SF 125.7754570 MHz  
 WDW EM  
 SSB 0  
 LB 1.00 Hz  
 GB 0  
 PC 1.40

# <sup>1</sup>H NMR of compound 5q

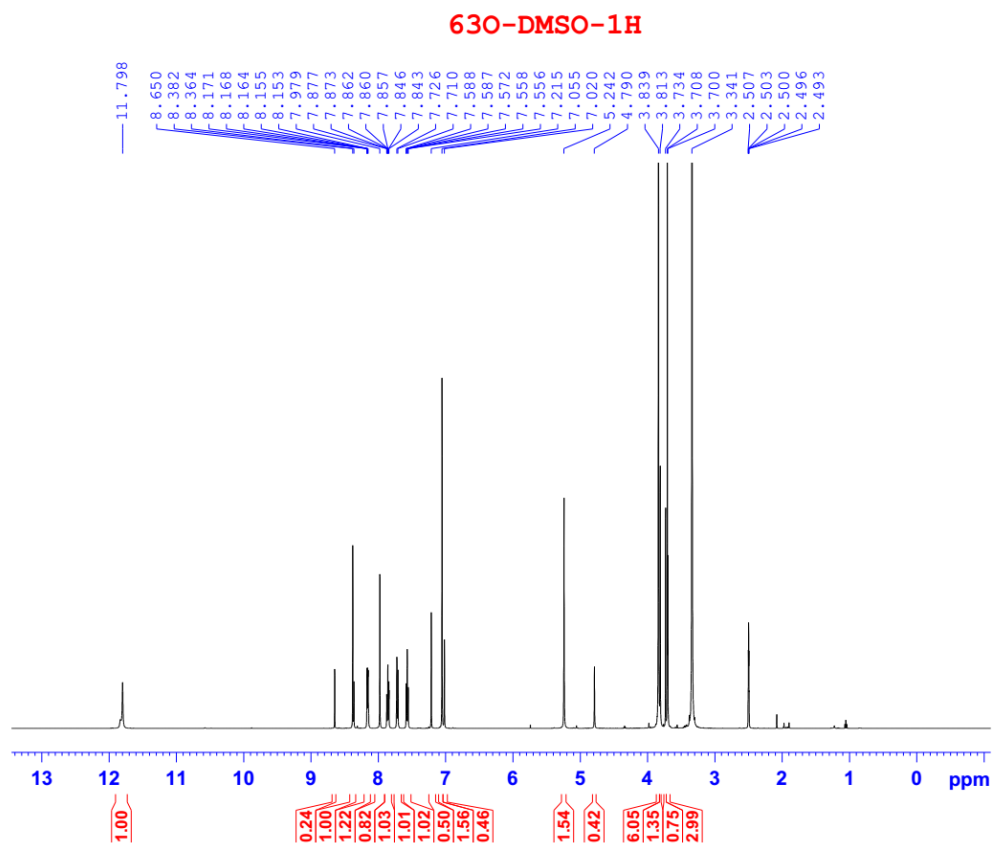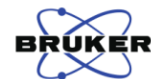

Current Data Parameters  
NAME TUAN\_630  
EXPNO 1  
PROCNO 1

F2 - Acquisition Parameters  
Date\_ 20170412  
Time 16.00  
INSTRUM spect  
PROBHD 5 mm PABBO BB/  
PULPROG zg30  
TD 65536  
SOLVENT DMSO  
NS 16  
DS 2  
SWH 10000.000 Hz  
FIDRES 0.152588 Hz  
AQ 3.2767999 sec  
RG 89.63  
DW 50.000 usec  
DE 6.50 usec  
TE 302.6 K  
D1 1.00000000 sec  
TD0 1

----- CHANNEL f1 -----  
SF01 500.2030889 MHz  
NUC1 1H  
P1 10.00 usec  
PLW1 22.00000000 W

F2 - Processing parameters  
SI 65536  
SF 500.2000053 MHz  
WDW EM  
SSB 0  
LB 0.30 Hz  
GB 0  
PC 1.00

# <sup>13</sup>C NMR of compound 5q

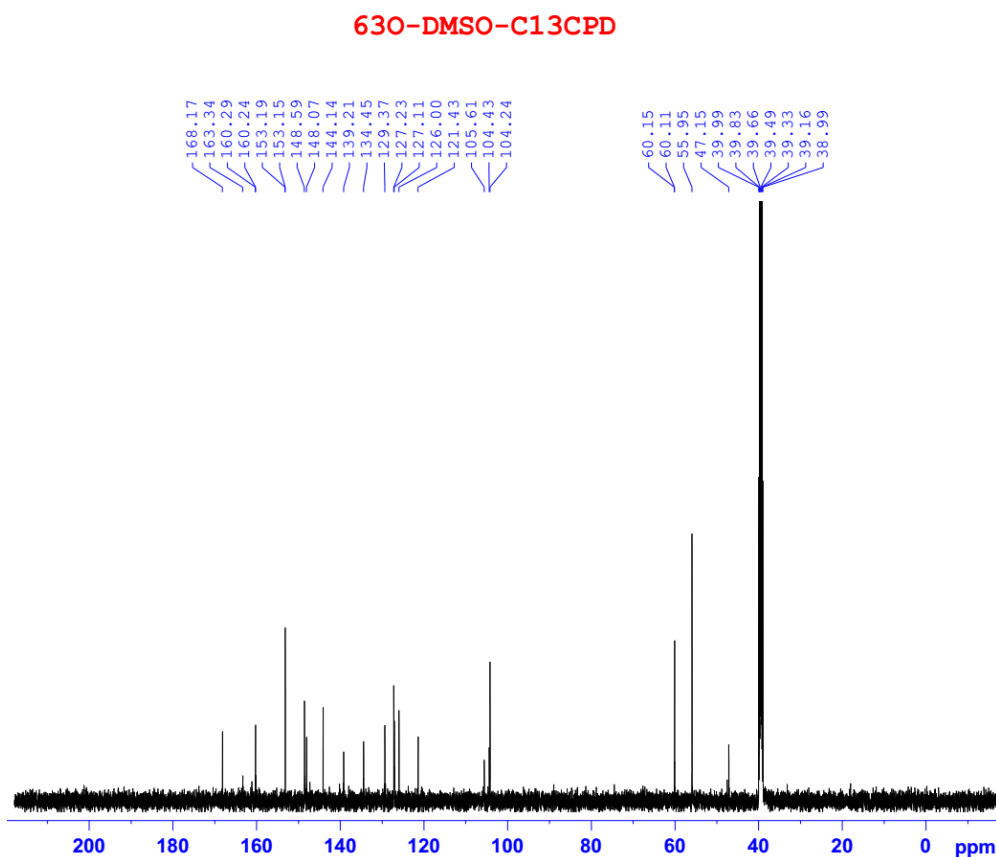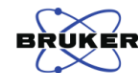

Current Data Parameters  
NAME TUAN\_630  
EXPNO 2  
PROCNO 1

F2 - Acquisition Parameters  
Date\_ 20170413  
Time 17.30  
INSTRUM spect  
PROBHD 5 mm PABBO BB/  
PULPROG zgpg30  
TD 65536  
SOLVENT DMSO  
NS 128  
DS 4  
SWH 29761.904 Hz  
FIDRES 0.454131 Hz  
AQ 1.1010048 sec  
RG 198.57  
DW 16.800 usec  
DE 6.50 usec  
TE 302.0 K  
D1 2.00000000 sec  
D11 0.03000000 sec  
TD0 1

===== CHANNEL f1 =====  
SF01 125.7879670 MHz  
NUC1 13C  
P1 10.00 usec  
PLW1 88.00000000 W

===== CHANNEL f2 =====  
SF02 500.2020008 MHz  
NUC2 1H  
CPDPRG[2] waltz16  
PCPD2 80.00 usec  
PLW2 22.00000000 W  
PLW12 0.34375000 W  
PLW13 0.22000000 W

F2 - Processing parameters  
SI 32768  
SF 125.7754525 MHz  
WDW EM  
SSB 0  
LB 1.00 Hz  
GB 0  
PC 1.40

# <sup>1</sup>H NMR of compound 5r

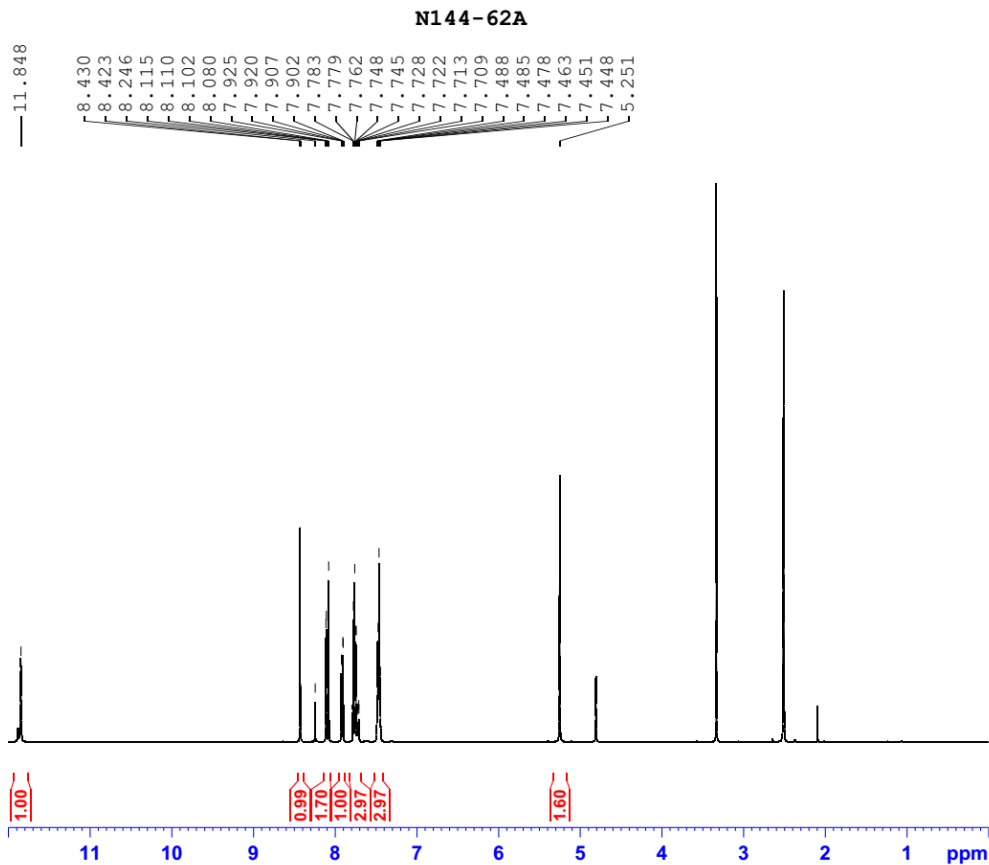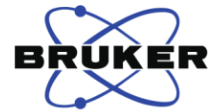

Current Data Parameters  
 NAME N144-62A  
 EXPNO 50  
 PROCNO 1

F2 - Acquisition Parameters  
 Date\_ 20170509  
 Time 23.45  
 INSTRUM spect  
 PROBHD 5 mm PABBO BB/  
 PULPROG zg30  
 TD 65536  
 SOLVENT DMSO  
 NS 16  
 DS 2  
 SWH 10000.000 Hz  
 FIDRES 0.152588 Hz  
 AQ 3.2767999 sec  
 RG 191.38  
 DW 50.000 usec  
 DE 6.50 usec  
 TE 298.2 K  
 D1 1.0000000 sec  
 TD0 1

===== CHANNEL f1 =====  
 SFO1 500.1330885 MHz  
 NUC1 1H  
 P1 9.80 usec  
 PLW1 24.00000000 W

F2 - Processing parameters  
 SI 65536  
 SF 500.1300000 MHz  
 WDW EM  
 SSB 0  
 LB 0.30 Hz  
 GB 0  
 PC 1.00

**<sup>13</sup>C NMR of compound 5r**

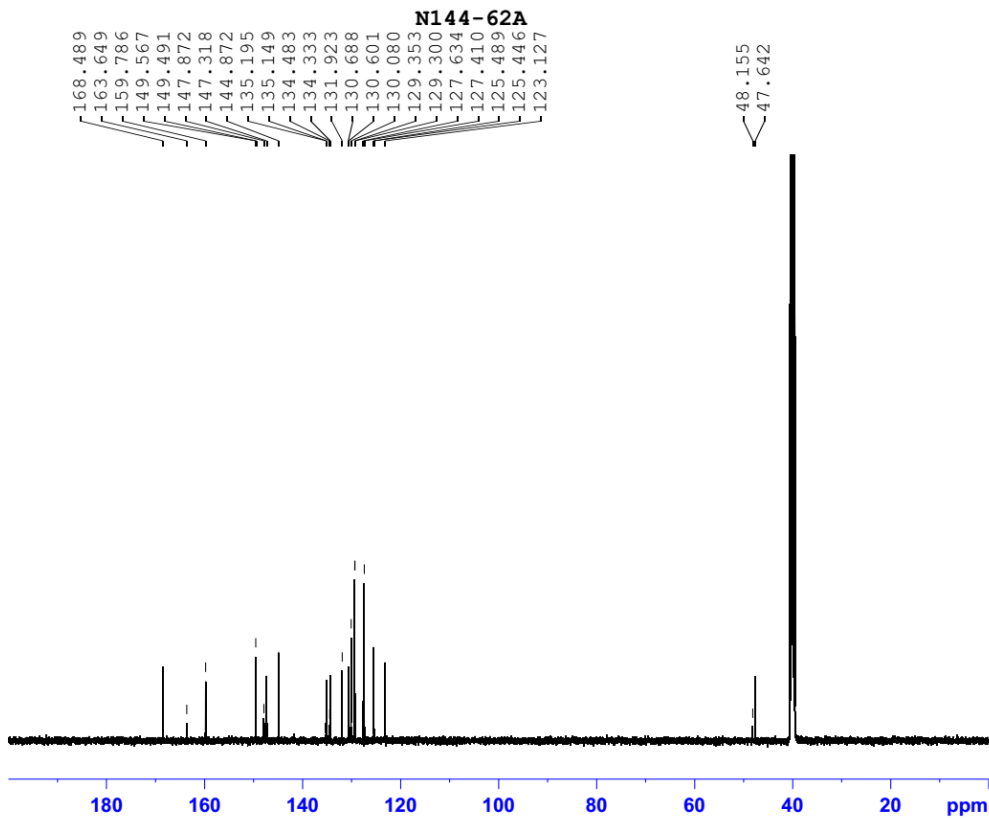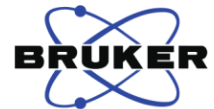

Current Data Parameters  
 NAME N144-62A  
 EXPNO 52  
 PROCNO 1

F2 - Acquisition Parameters  
 Date\_ 20170510  
 Time 1.32  
 INSTRUM spect  
 PROBHD 5 mm PABBO BB/  
 PULPROG zgpg30  
 TD 65536  
 SOLVENT DMSO  
 NS 2048  
 DS 4  
 SWH 31250.000 Hz  
 FIDRES 0.476837 Hz  
 AQ 1.0485760 sec  
 RG 191.38  
 DW 16.000 usec  
 DE 6.50 usec  
 TE 299.2 K  
 D1 2.0000000 sec  
 D11 0.0300000 sec  
 TD0 1

===== CHANNEL f1 =====  
 SFO1 125.7703637 MHz  
 NUC1 13C  
 P1 9.50 usec  
 PLW1 90.00000000 W

===== CHANNEL f2 =====  
 SFO2 500.1320005 MHz  
 NUC2 1H  
 CPDPRG[2] waltz16  
 PCPD2 80.00 usec  
 PLW2 24.00000000 W  
 PLW12 0.36015001 W  
 PLW13 0.23050000 W

F2 - Processing parameters  
 SI 65536  
 SF 125.7577885 MHz  
 WDW EM  
 SSB 0  
 LB 1.00 Hz  
 GB 0  
 PC 1.40

**<sup>1</sup>H NMR of compound 5s**

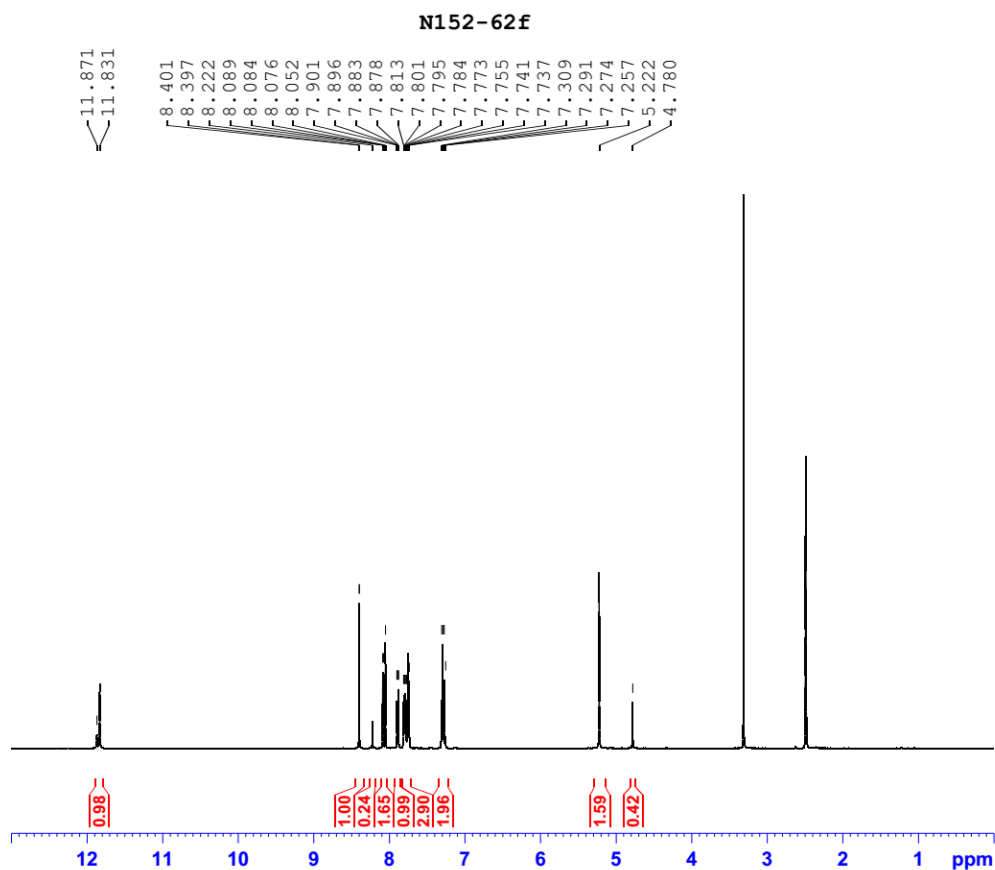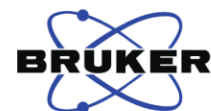

Current Data Parameters  
 NAME N152-62f  
 EXPNO 10  
 PROCNO 1

F2 - Acquisition Parameters  
 Date\_ 20170519  
 Time 2.08  
 INSTRUM spect  
 PROBHD 5 mm PABBO BB/  
 PULPROG zg30  
 TD 65536  
 SOLVENT DMSO  
 NS 16  
 DS 2  
 SWH 10000.000 Hz  
 FIDRES 0.152588 Hz  
 AQ 3.2767999 sec  
 RG 191.38  
 DW 50.000 usec  
 DE 6.50 usec  
 TE 298.2 K  
 D1 1.0000000 sec  
 TDO 1

===== CHANNEL f1 =====  
 SFO1 500.1330885 MHz  
 NUC1 1H  
 P1 9.80 usec  
 PLW1 24.0000000 W

F2 - Processing parameters  
 SI 65536  
 SF 500.1300110 MHz  
 WDW EM  
 SSB 0  
 LB 0.30 Hz  
 GB 0  
 PC 1.00

**<sup>13</sup>C NMR of compound 5s**

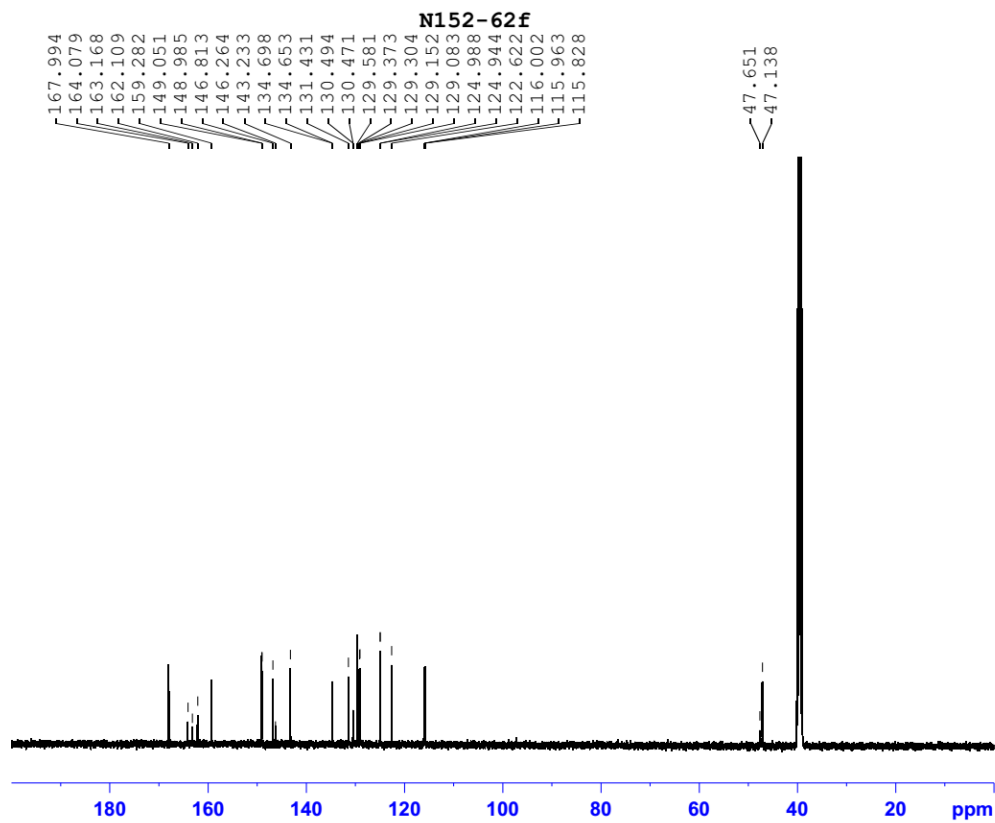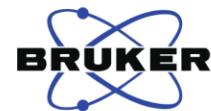

Current Data Parameters  
 NAME N152-62f  
 EXPNO 11  
 PROCNO 1

F2 - Acquisition Parameters  
 Date\_ 20170519  
 Time 3.55  
 INSTRUM spect  
 PROBHD 5 mm PABBO BB/  
 PULPROG zgpg30  
 TD 65536  
 SOLVENT DMSO  
 NS 2048  
 DS 4  
 SWH 31250.000 Hz  
 FIDRES 0.476837 Hz  
 AQ 1.0485760 sec  
 RG 191.38  
 DW 16.000 usec  
 DE 6.50 usec  
 TE 299.2 K  
 D1 2.0000000 sec  
 D11 0.0300000 sec  
 TDO 1

===== CHANNEL f1 =====  
 SFO1 125.7703637 MHz  
 NUC1 13C  
 P1 9.50 usec  
 PLW1 90.0000000 W

===== CHANNEL f2 =====  
 SFO2 500.1320005 MHz  
 NUC2 1H  
 CPDPRG[2] waltz16  
 PCPD2 80.00 usec  
 PLW2 24.0000000 W  
 PLW12 0.36015001 W  
 PLW13 0.23050000 W

F2 - Processing parameters  
 SI 65536  
 SF 125.7578510 MHz  
 WDW EM  
 SSB 0  
 LB 1.00 Hz  
 GB 0  
 PC 1.40

**<sup>1</sup>H NMR of compound 5t**

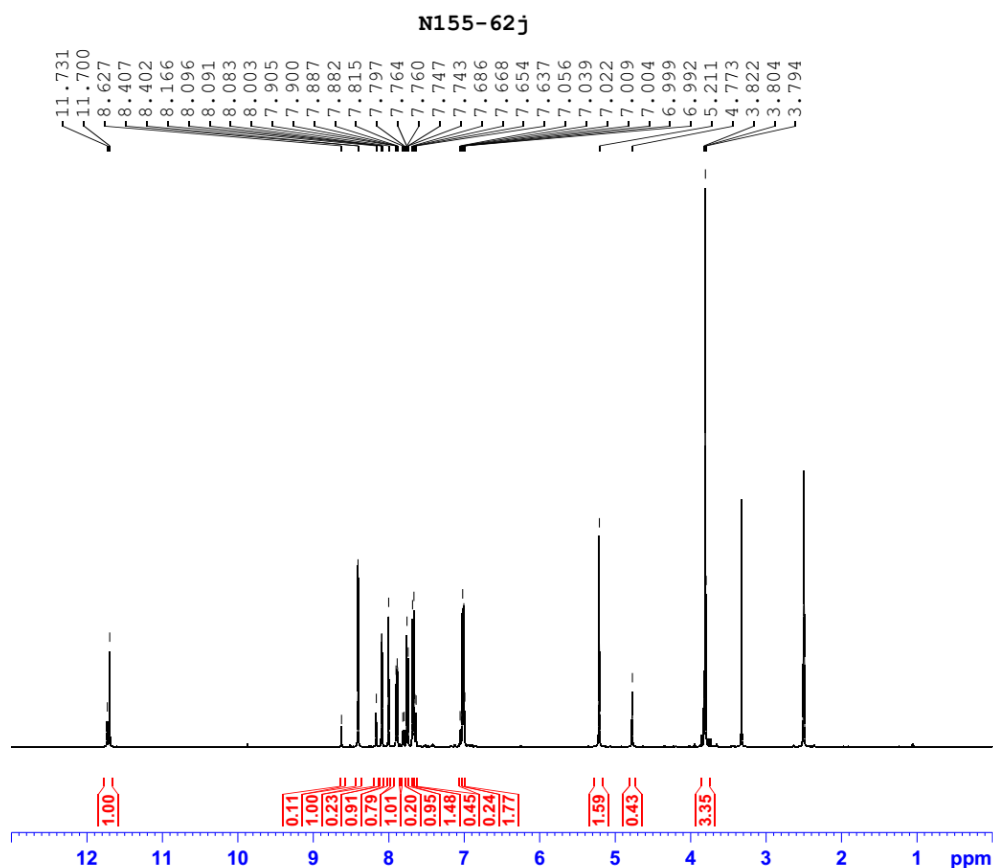

**<sup>13</sup>C NMR of compound 5t**

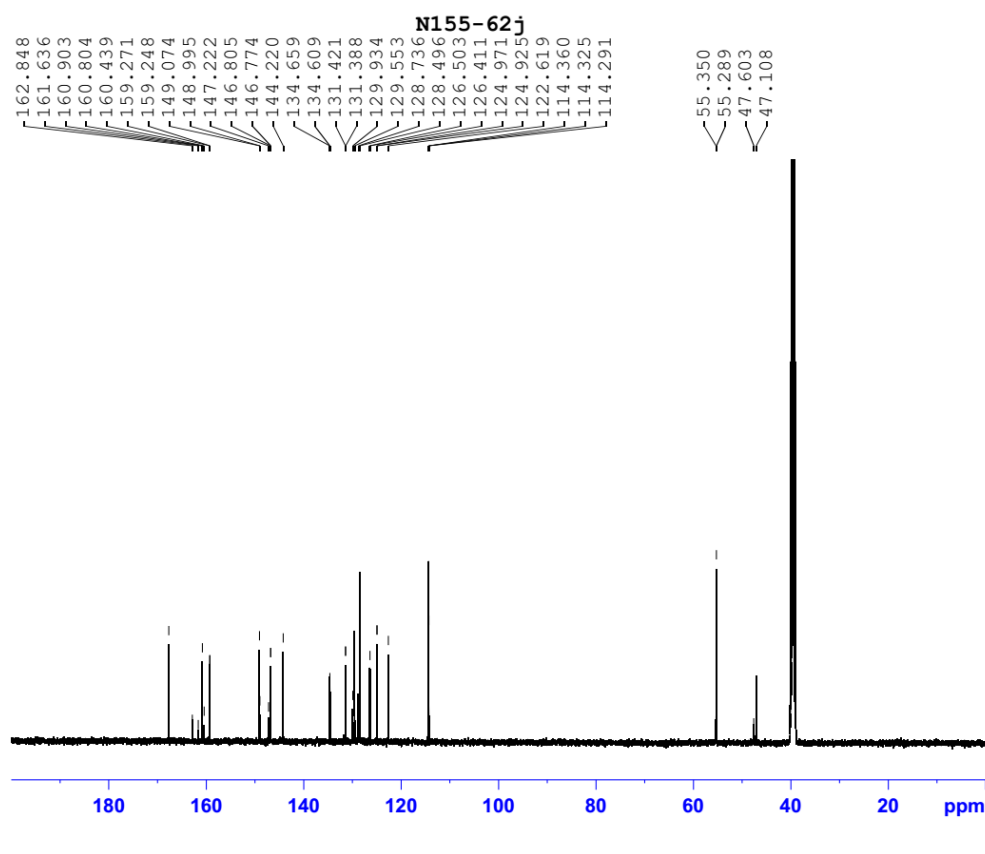

**<sup>1</sup>H NMR of compound 5u**

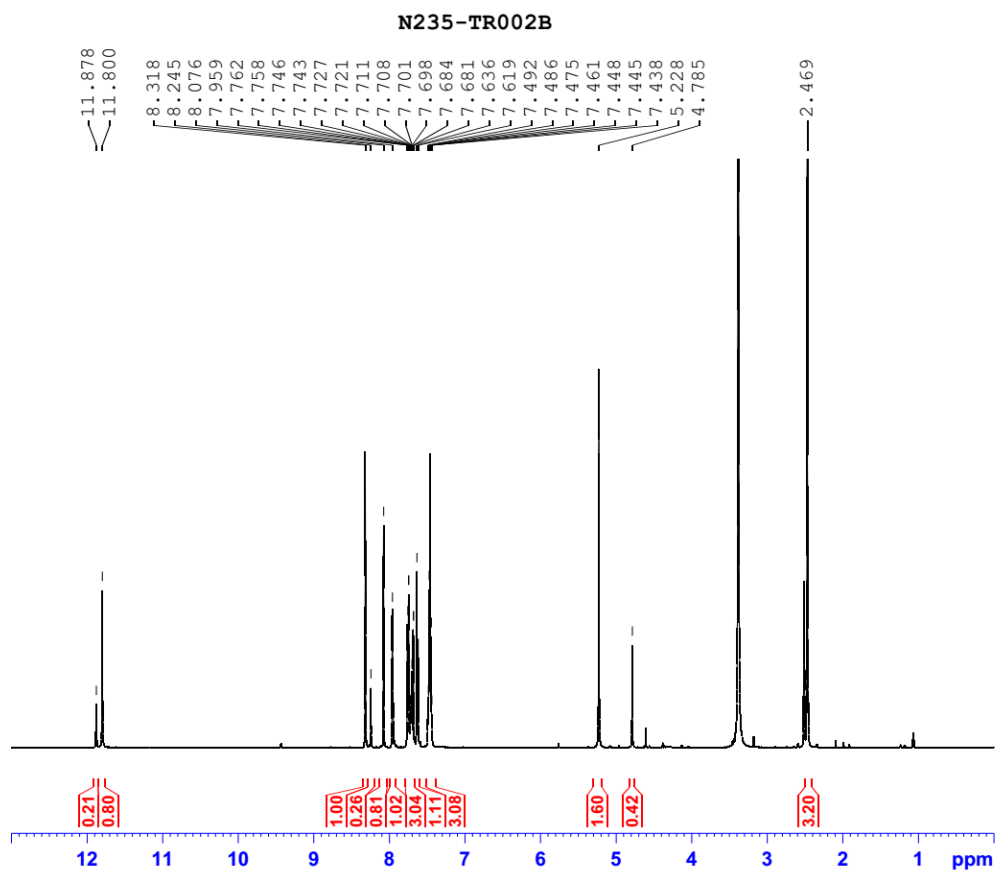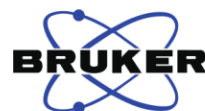

Current Data Parameters  
 NAME N235-TR002B  
 EXPNO 20  
 PROCNO 1

F2 - Acquisition Parameters  
 Date\_ 20161102  
 Time 16.41  
 INSTRUM spect  
 PROBHD 5 mm PABBO BB/  
 PULPROG zg30  
 TD 65536  
 SOLVENT DMSO  
 NS 16  
 DS 2  
 SWH 10000.000 Hz  
 FIDRES 0.152588 Hz  
 AQ 3.2767999 sec  
 RG 87.53  
 DW 50.000 usec  
 DE 6.50 usec  
 TE 298.6 K  
 D1 1.0000000 sec  
 TD0 1

===== CHANNEL f1 =====  
 SFO1 500.1330885 MHz  
 NUC1 1H  
 P1 9.80 usec  
 PLW1 24.0000000 W

F2 - Processing parameters  
 SI 65536  
 SF 500.1300000 MHz  
 WDW EM  
 SSB 0  
 LB 0.30 Hz  
 GB 0  
 PC 1.00

**<sup>13</sup>C NMR of compound 5u**

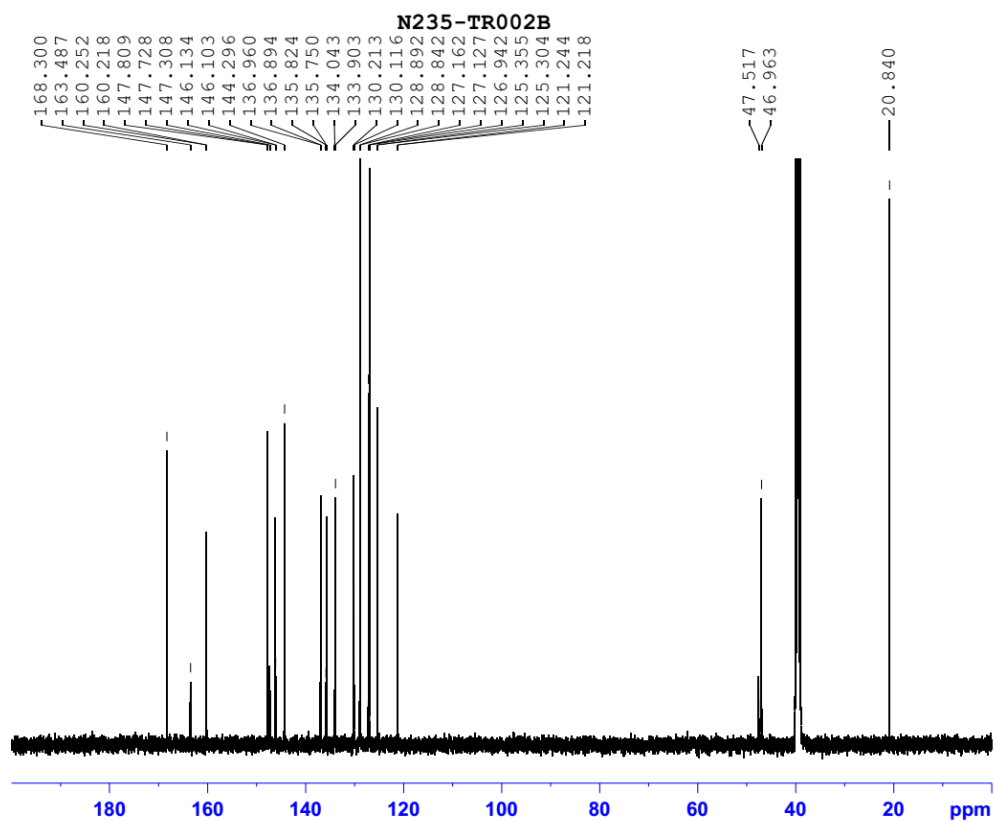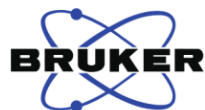

Current Data Parameters  
 NAME N235-TR002B  
 EXPNO 21  
 PROCNO 1

F2 - Acquisition Parameters  
 Date\_ 20161102  
 Time 18.29  
 INSTRUM spect  
 PROBHD 5 mm PABBO BB/  
 PULPROG zgpg30  
 TD 65536  
 SOLVENT DMSO  
 NS 2048  
 DS 4  
 SWH 31250.000 Hz  
 FIDRES 0.476837 Hz  
 AQ 1.0485760 sec  
 RG 191.38  
 DW 16.000 usec  
 DE 6.50 usec  
 TE 299.8 K  
 D1 2.0000000 sec  
 D11 0.0300000 sec  
 TD0 1

===== CHANNEL f1 =====  
 SFO1 125.7703637 MHz  
 NUC1 13C  
 P1 9.50 usec  
 PLW1 90.0000000 W

===== CHANNEL f2 =====  
 SFO2 500.1320005 MHz  
 NUC2 1H  
 CPDPRG[2] waltz16  
 PCPD2 80.00 usec  
 PLW2 24.0000000 W  
 PLW12 0.36015001 W  
 PLW13 0.23050000 W

F2 - Processing parameters  
 SI 65536  
 SF 125.7578459 MHz  
 WDW EM  
 SSB 0  
 LB 1.00 Hz  
 GB 0  
 PC 1.40

**<sup>1</sup>H NMR of compound 5v**

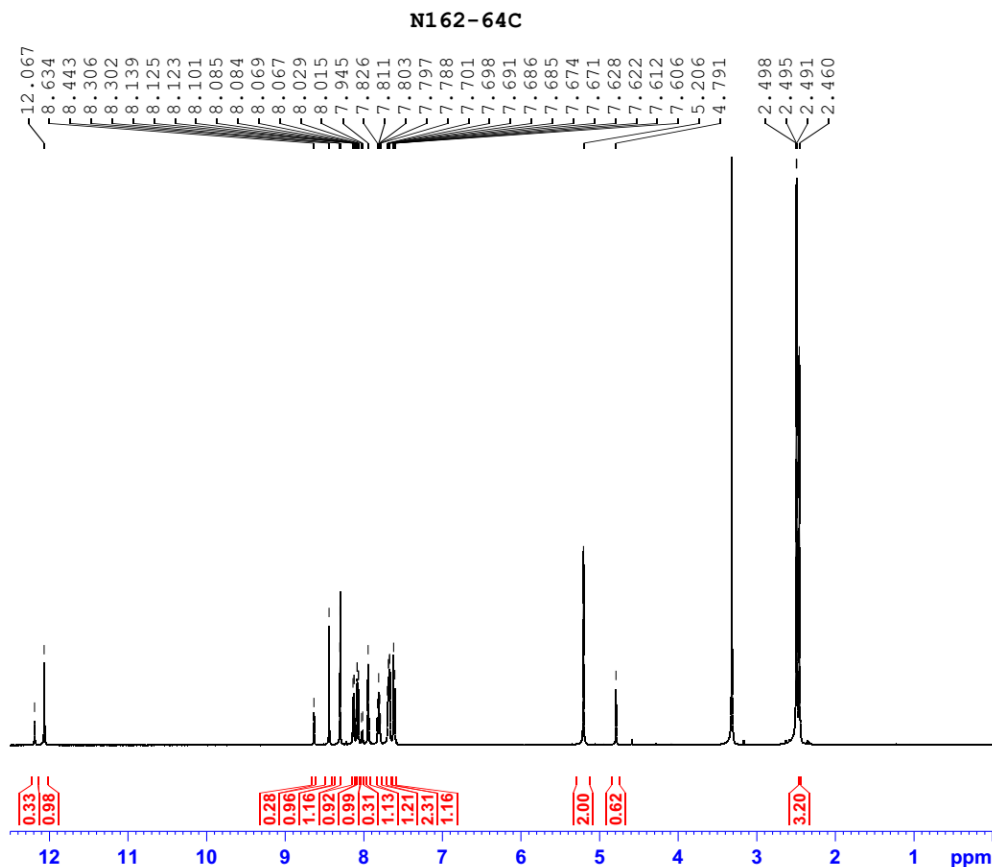

**<sup>13</sup>C NMR of compound 5v**

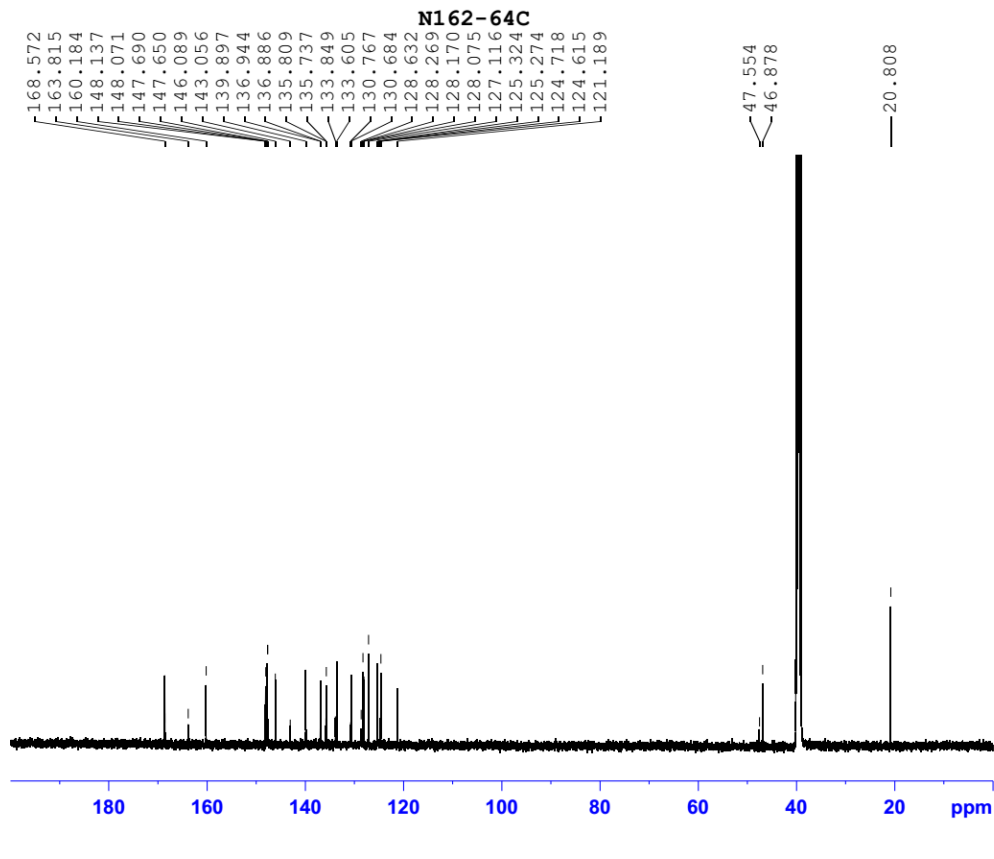

**<sup>1</sup>H NMR of compound 5w**



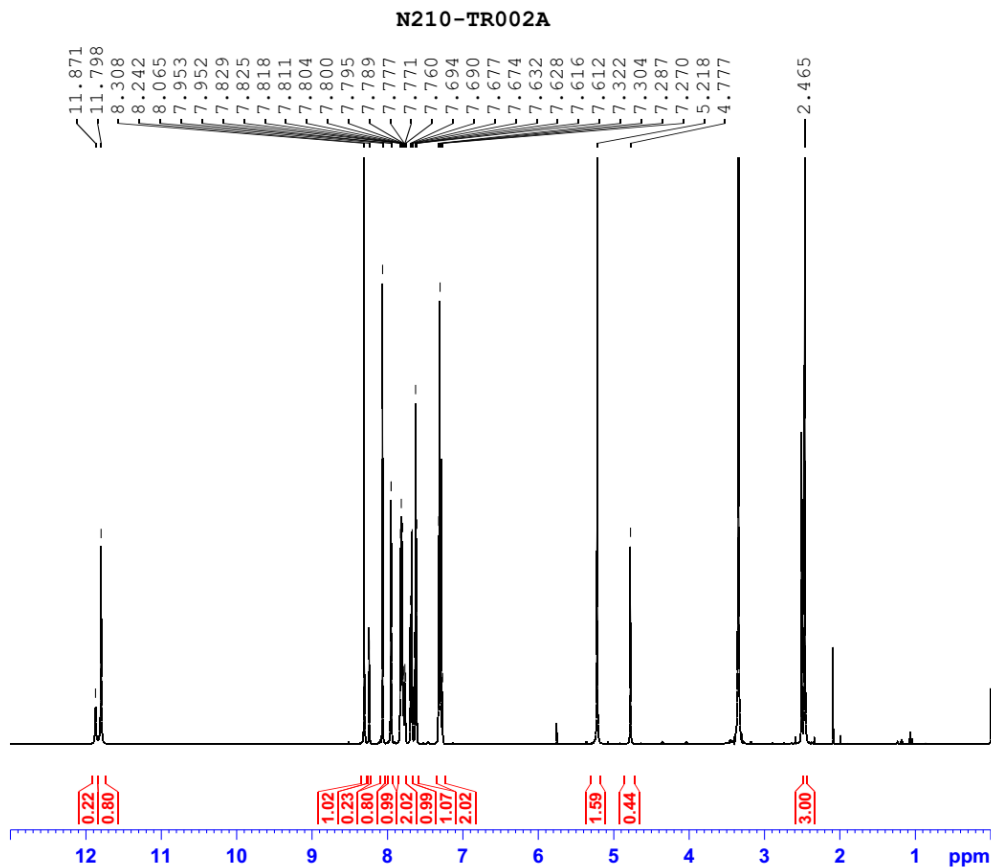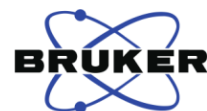

Current Data Parameters  
 NAME N210-TR002A  
 EXPNO 10  
 PROCNO 1

F2 - Acquisition Parameters  
 Date\_ 20160928  
 Time 8.26  
 INSTRUM spect  
 PROBHD 5 mm PABBO BB/  
 PULPROG zg30  
 TD 65536  
 SOLVENT DMSO  
 NS 64  
 DS 2  
 SWH 10000.000 Hz  
 FIDRES 0.152588 Hz  
 AQ 3.2767999 sec  
 RG 123.67  
 DW 50.000 usec  
 DE 6.50 usec  
 TE 300.0 K  
 D1 1.00000000 sec  
 TD0 1

===== CHANNEL f1 =====  
 SFO1 500.1330885 MHz  
 NUC1 1H  
 P1 9.50 usec  
 PLW1 24.00000000 W

F2 - Processing parameters  
 SI 65536  
 SF 500.1300024 MHz  
 WDW EM  
 SSB 0  
 LB 0.30 Hz  
 GB 0  
 PC 1.00

**<sup>13</sup>C NMR of compound 5w**

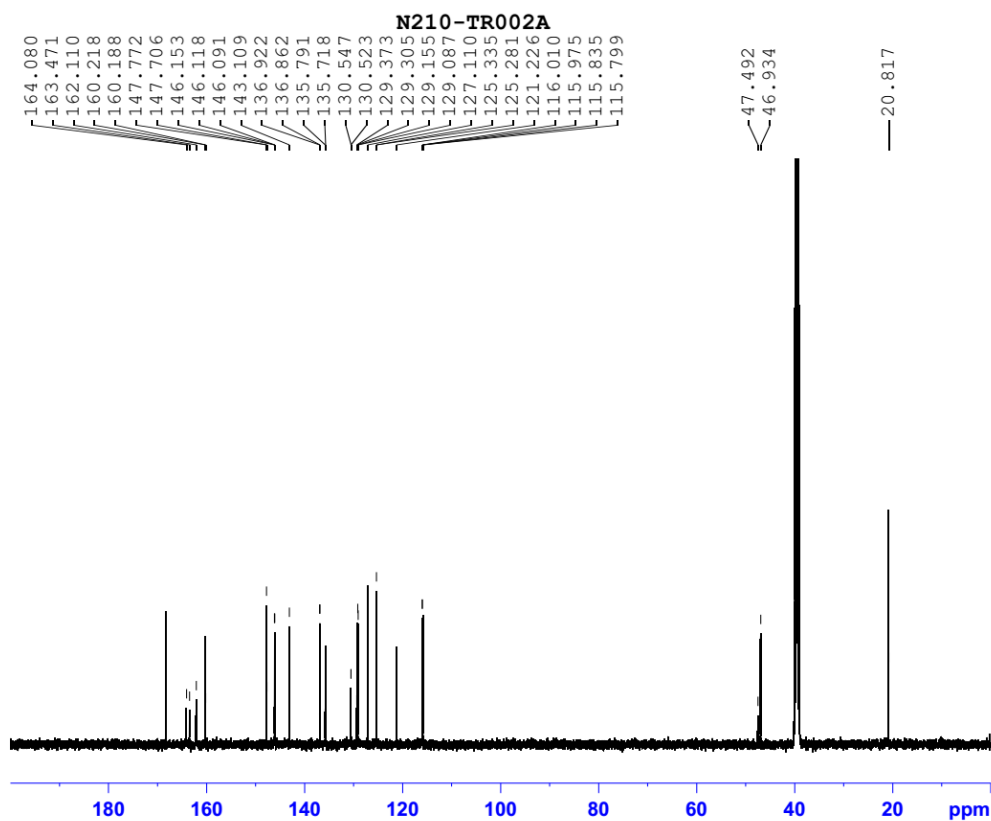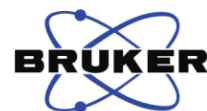

Current Data Parameters  
 NAME N210-TR002A  
 EXPNO 11  
 PROCNO 1

F2 - Acquisition Parameters  
 Date\_ 20160928  
 Time 14.57  
 INSTRUM spect  
 PROBHD 5 mm PABBO BB/  
 PULPROG zgpg30  
 TD 65536  
 SOLVENT DMSO  
 NS 1114  
 DS 4  
 SWH 31250.000 Hz  
 FIDRES 0.476837 Hz  
 AQ 1.0485760 sec  
 RG 191.38  
 DW 16.000 usec  
 DE 6.50 usec  
 TE 300.0 K  
 D1 2.00000000 sec  
 D11 0.03000000 sec  
 TD0 1

===== CHANNEL f1 =====  
 SFO1 125.7703637 MHz  
 NUC1 13C  
 P1 9.50 usec  
 PLW1 90.00000000 W

===== CHANNEL f2 =====  
 SFO2 500.1320005 MHz  
 NUC2 1H  
 CPDPRG[2] waltz16  
 PCPD2 80.00 usec  
 PLW2 24.00000000 W  
 PLW12 0.35284001 W  
 PLW13 0.22582000 W

F2 - Processing parameters  
 SI 65536  
 SF 125.7578485 MHz  
 WDW EM  
 SSB 0  
 LB 1.00 Hz  
 GB 0  
 PC 1.40

**<sup>1</sup>H NMR of compound 5y**

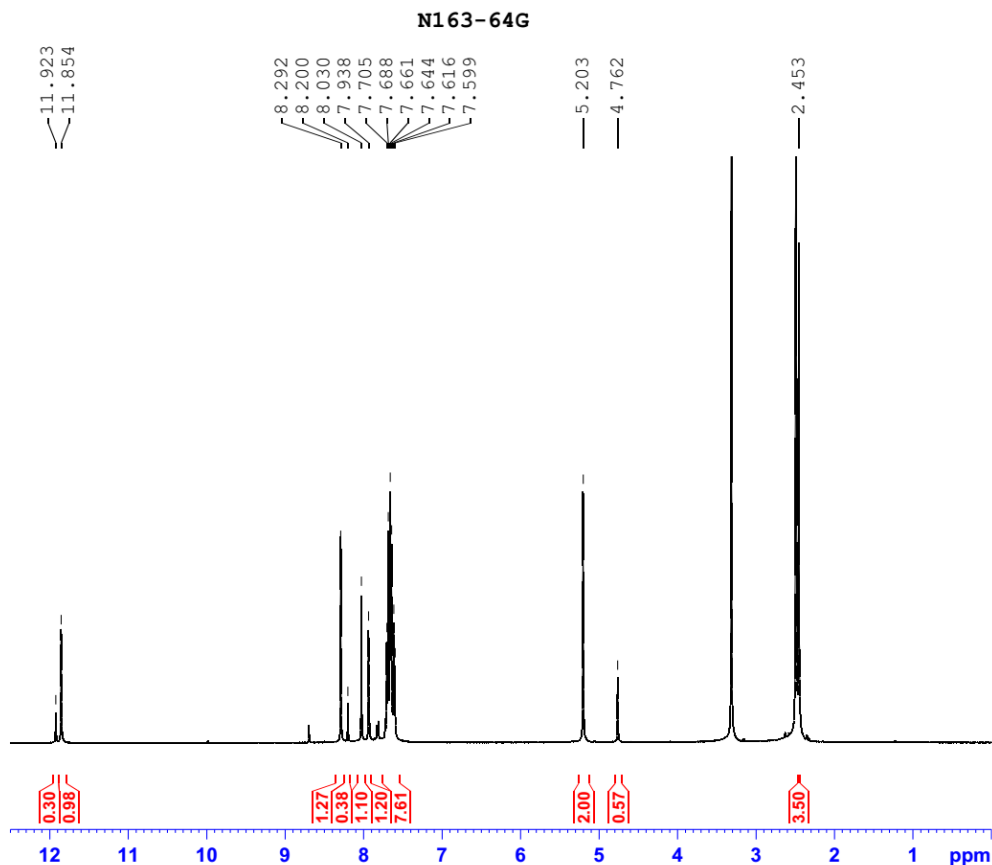

**<sup>13</sup>C NMR of compound 5y**

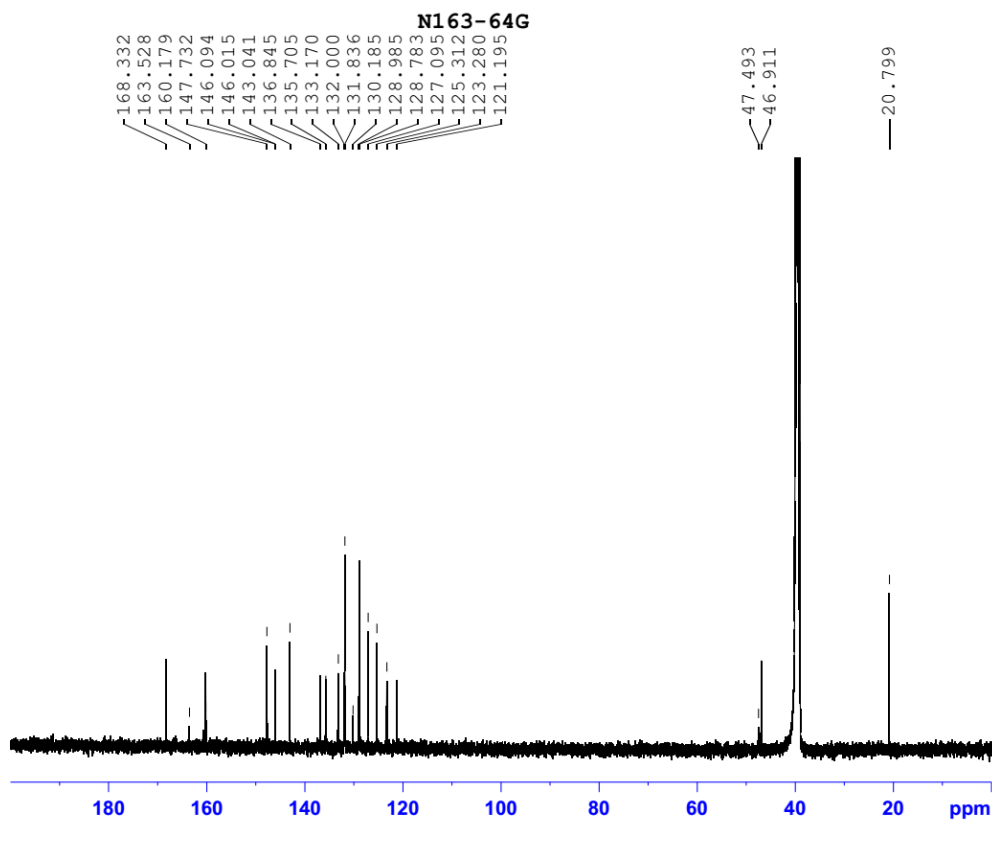

**<sup>1</sup>H NMR of compound 5x**

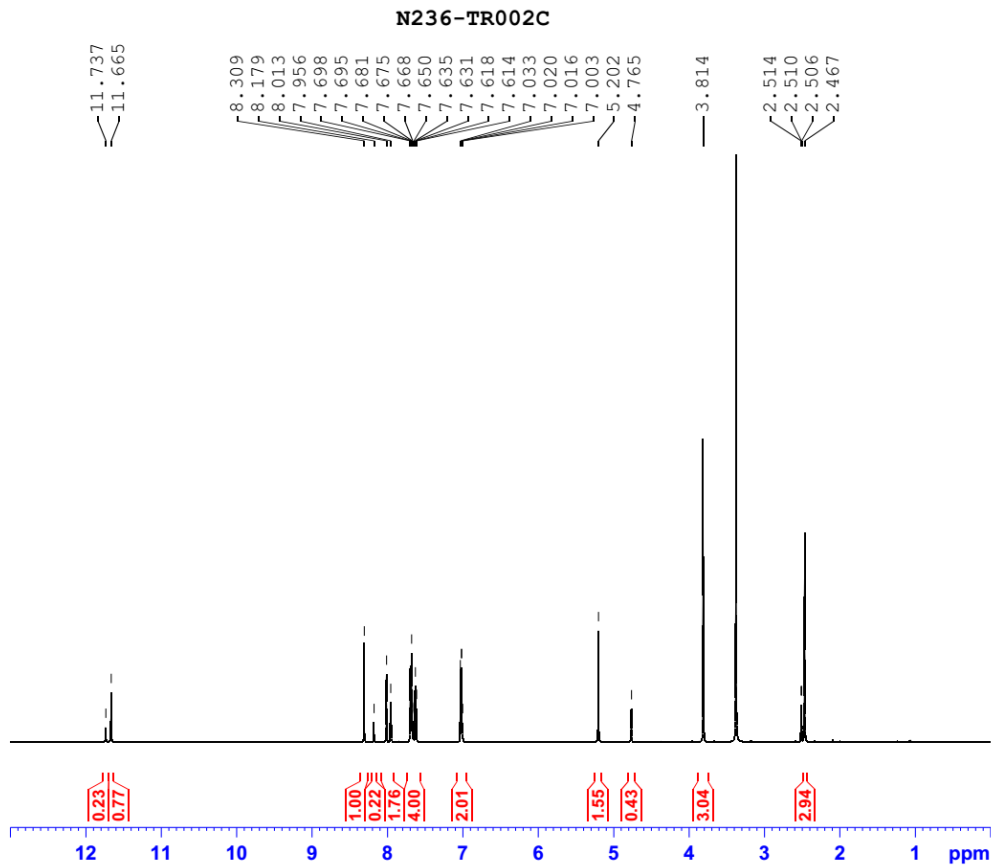

**<sup>13</sup>C NMR of compound 5x**

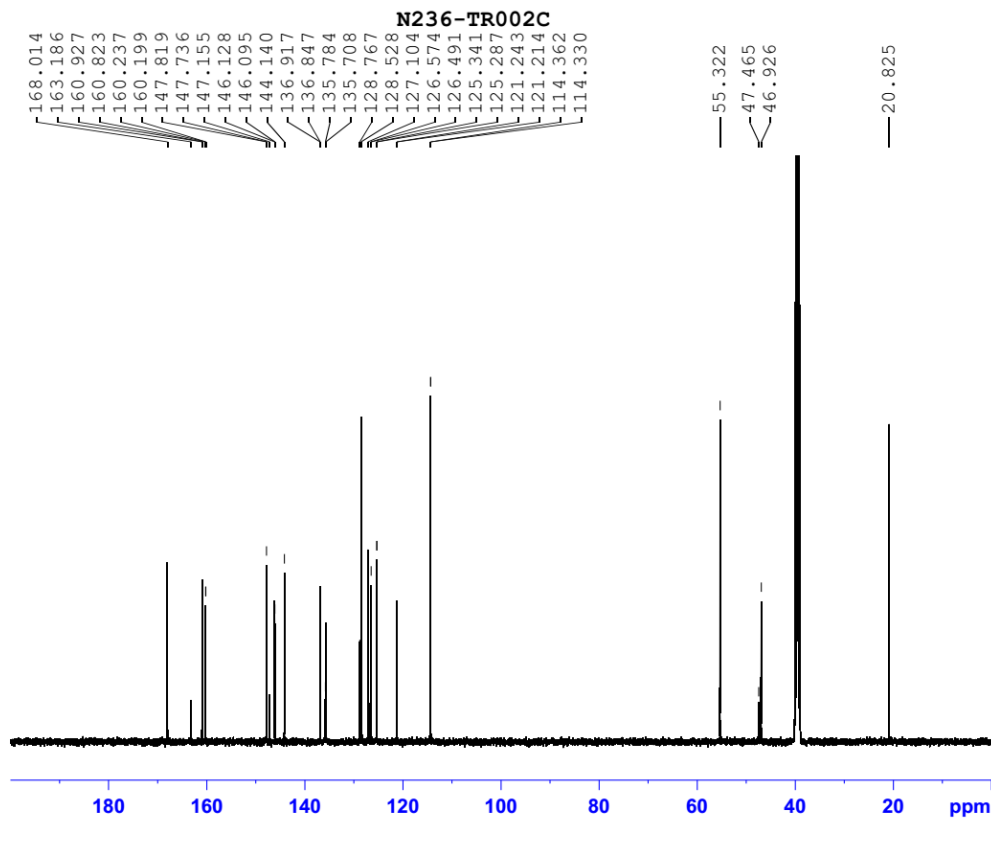

**<sup>1</sup>H NMR of compound 5z**

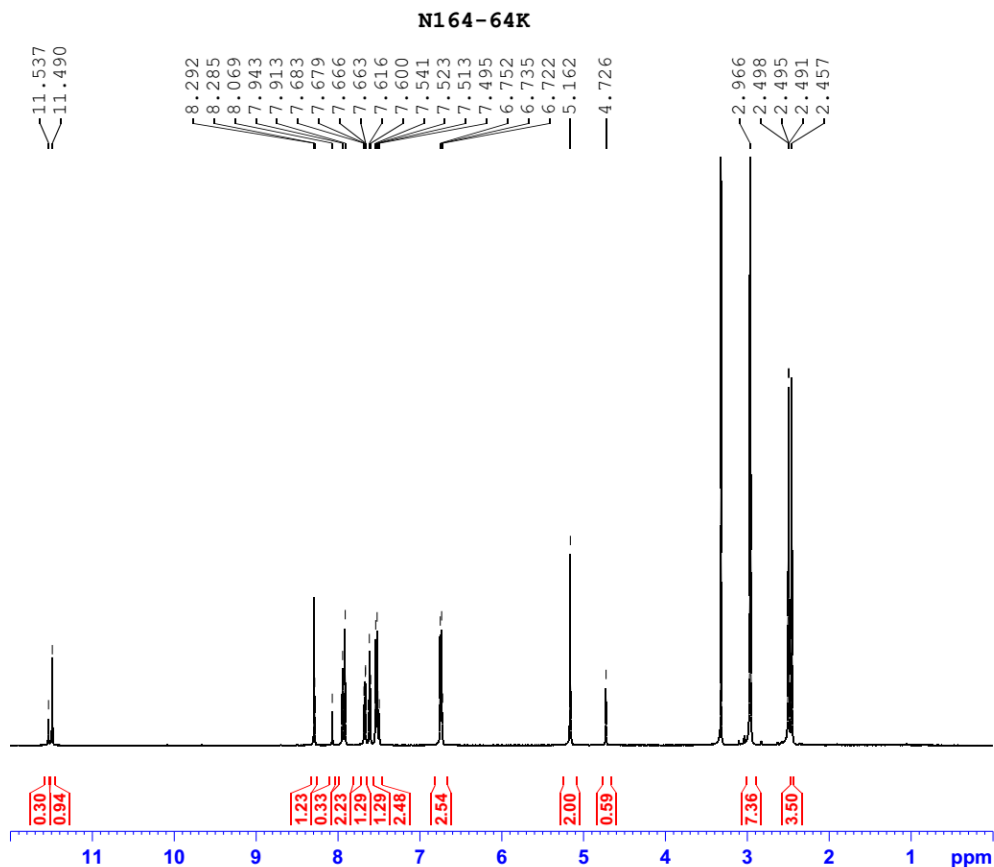

**<sup>13</sup>C NMR of compound 5z**

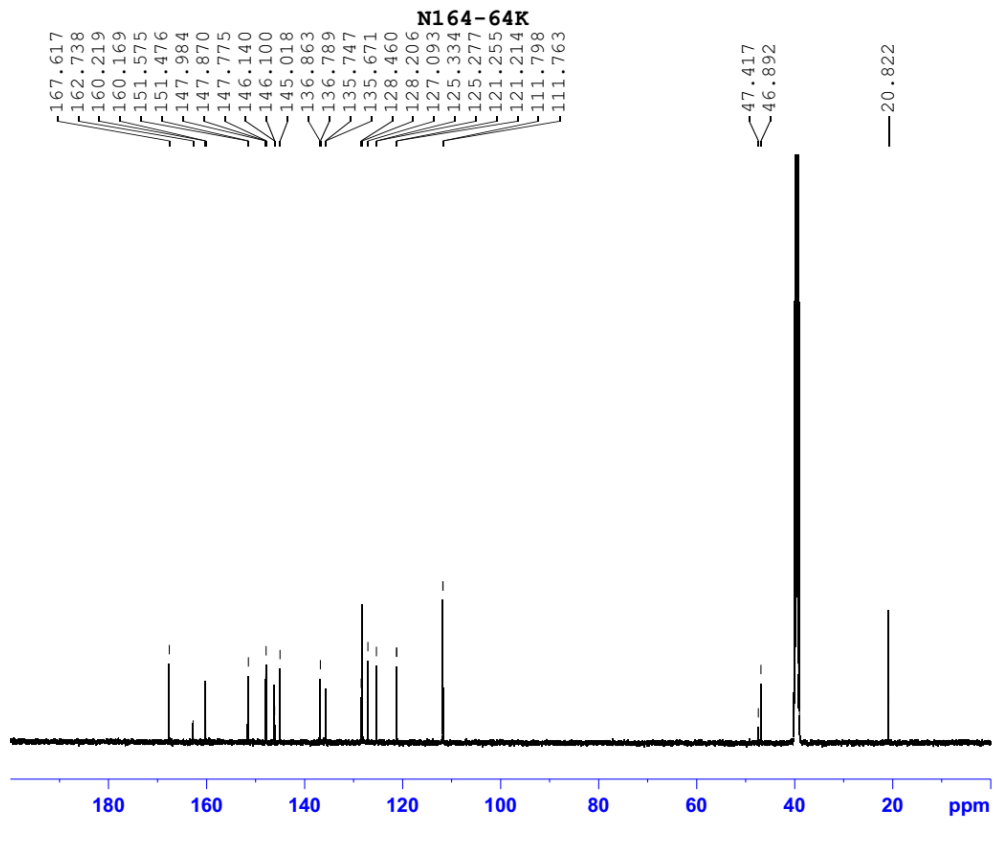

**<sup>1</sup>H NMR of compound 6a**

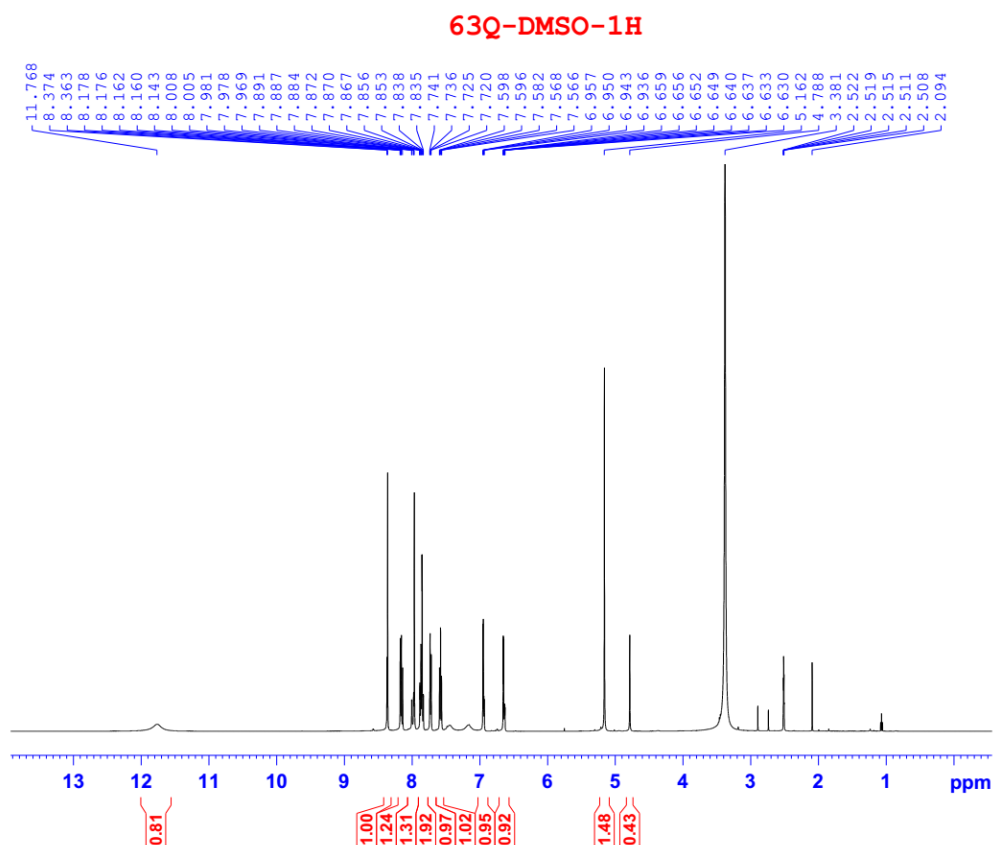

<sup>13</sup>C NMR of compound 6a

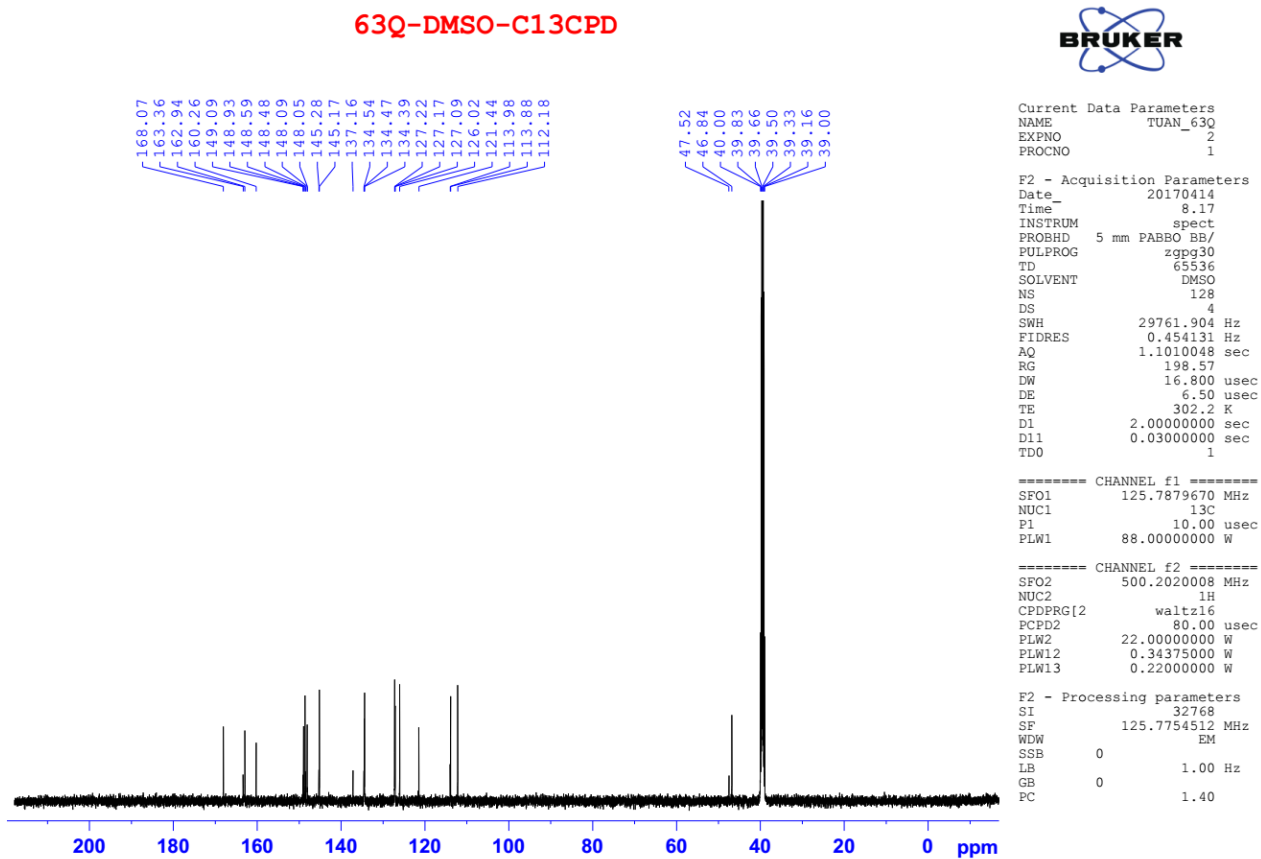

<sup>1</sup>H NMR of compound 6b

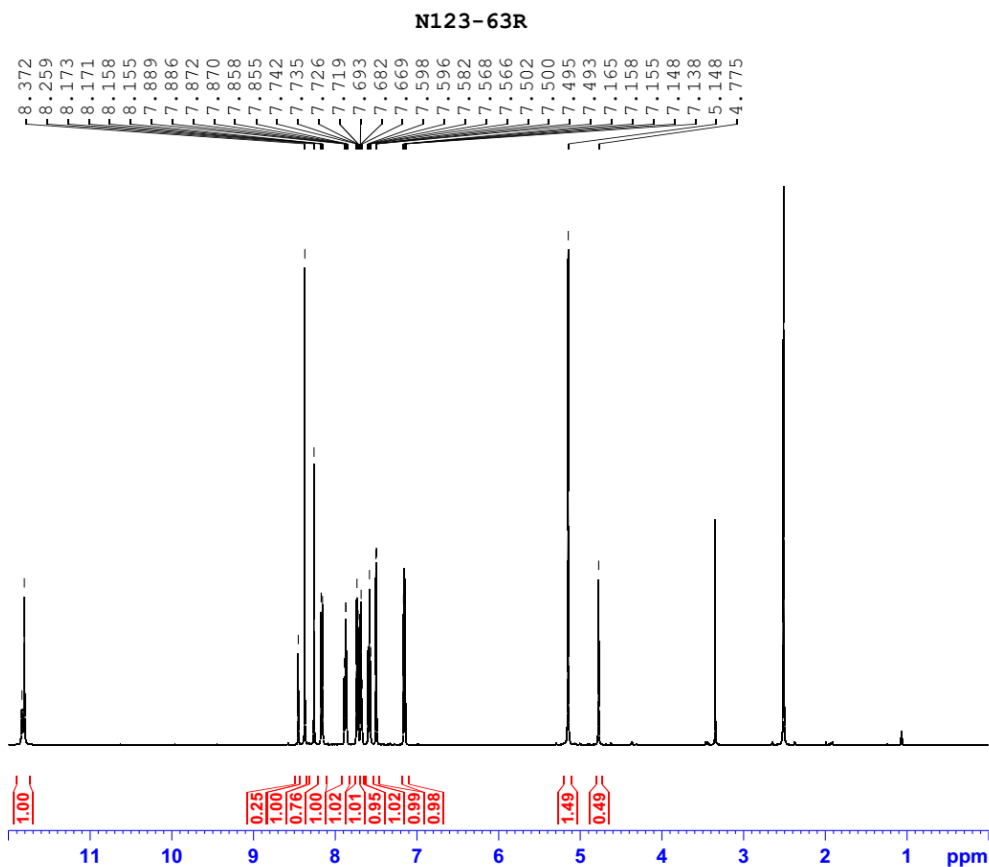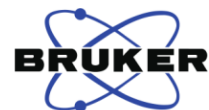

Current Data Parameters  
 NAME N123-63R  
 EXPNO 20  
 PROCNO 1

F2 - Acquisition Parameters  
 Date\_ 20170425  
 Time 17.29  
 INSTRUM spect  
 PROBHD 5 mm PABBO BB/  
 PULPROG zg30  
 TD 65536  
 SOLVENT DMSO  
 NS 16  
 DS 2  
 SWH 10000.000 Hz  
 FIDRES 0.152588 Hz  
 AQ 3.2767999 sec  
 RG 191.38  
 DW 50.000 usec  
 DE 6.50 usec  
 TE 295.9 K  
 D1 1.00000000 sec  
 TD0 1

===== CHANNEL f1 =====  
 SFO1 500.1330885 MHz  
 NUC1 1H  
 P1 9.80 usec  
 PLW1 24.00000000 W

F2 - Processing parameters  
 SI 65536  
 SF 500.1300000 MHz  
 WDW EM  
 SSB 0  
 LB 0.30 Hz  
 GB 0  
 PC 1.00

**<sup>13</sup>C NMR of compound 6b**

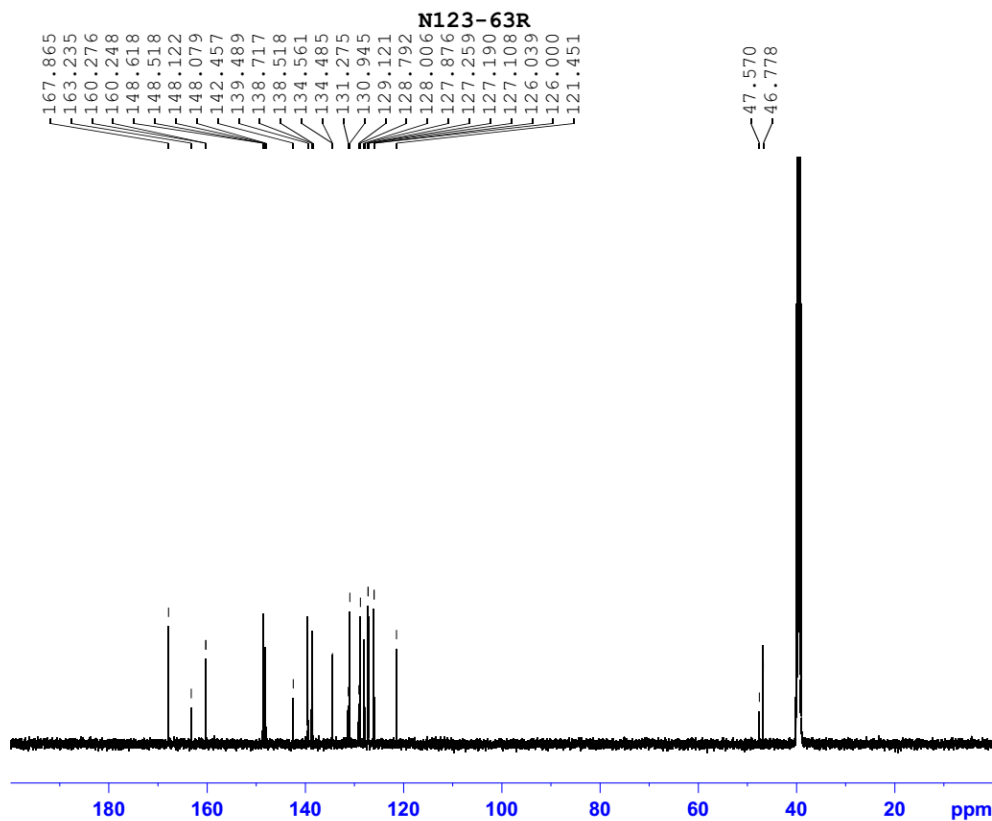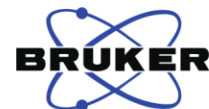

Current Data Parameters  
 NAME N123-63R  
 EXPNO 22  
 PROCNO 1

F2 - Acquisition Parameters  
 Date\_ 20170425  
 Time 18.23  
 INSTRUM spect  
 PROBHD 5 mm PABBO BB/  
 FULPROG zgpg30  
 TD 65536  
 SOLVENT DMSO  
 NS 1024  
 DS 4  
 SWH 31250.000 Hz  
 FIDRES 0.476837 Hz  
 AQ 1.0485760 sec  
 RG 191.38  
 DW 16.000 usec  
 DE 6.50 usec  
 TE 296.9 K  
 D1 2.00000000 sec  
 D11 0.03000000 sec  
 TD0 1

===== CHANNEL f1 =====  
 SFO1 125.7703637 MHz  
 NUC1 13C  
 P1 9.50 usec  
 PLW1 90.00000000 W

===== CHANNEL f2 =====  
 SFO2 500.1320005 MHz  
 NUC2 1H  
 CPDPRG[2] waltz16  
 PCPD2 80.00 usec  
 PLW2 24.00000000 W  
 PLW12 0.36015001 W  
 PLW13 0.23050000 W

F2 - Processing parameters  
 SI 65536  
 SF 125.7578471 MHz  
 WDW EM  
 SSB 0  
 LB 1.00 Hz  
 GB 0  
 PC 1.40

**<sup>1</sup>H NMR of compound 6c**

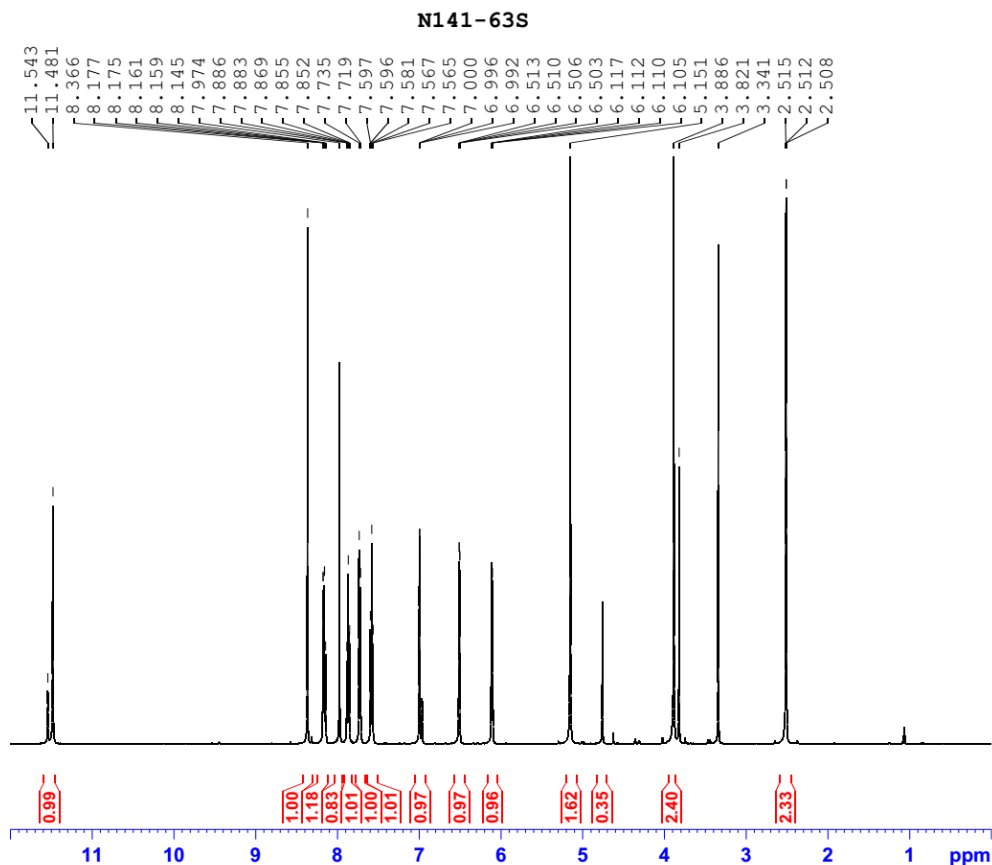

**<sup>13</sup>C NMR of compound 6c**

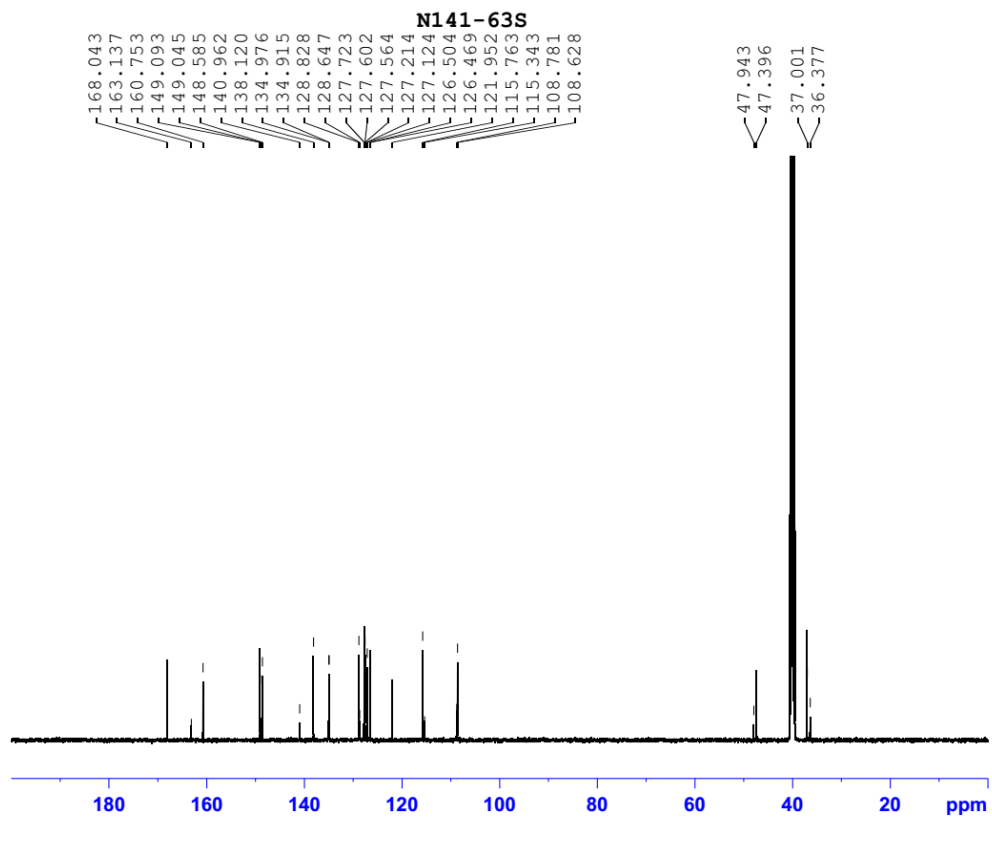

**<sup>1</sup>H NMR of compound 6d**

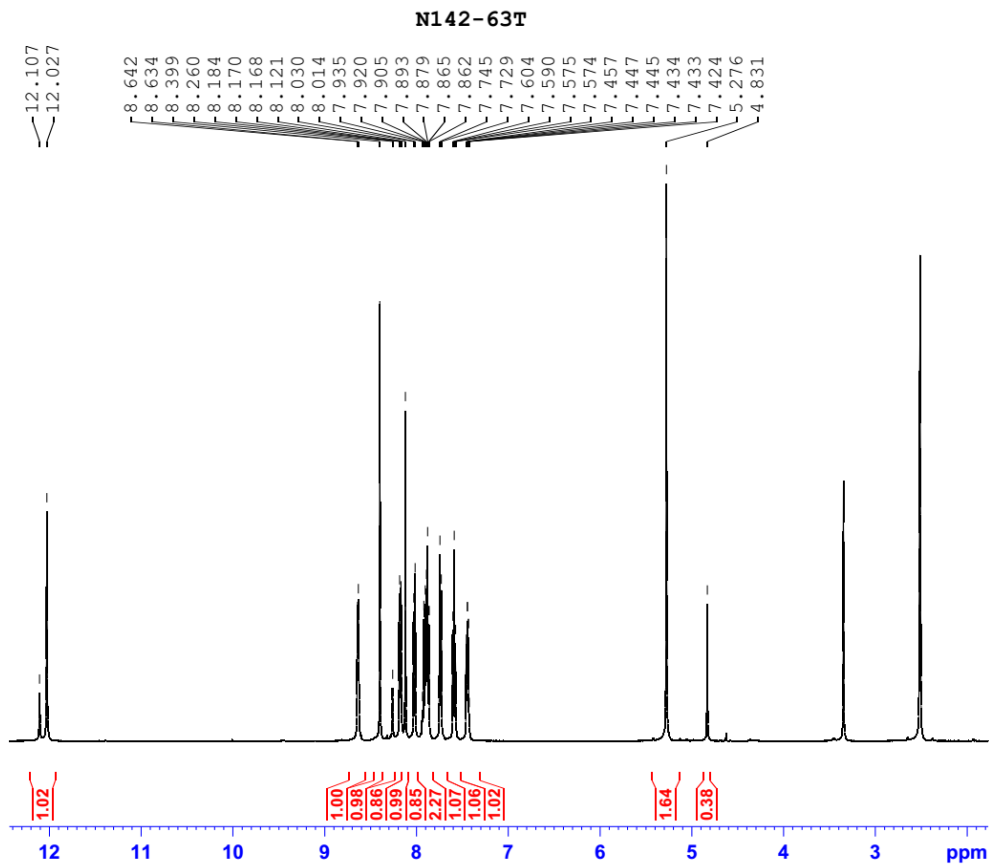

**<sup>13</sup>C NMR of compound 6d**

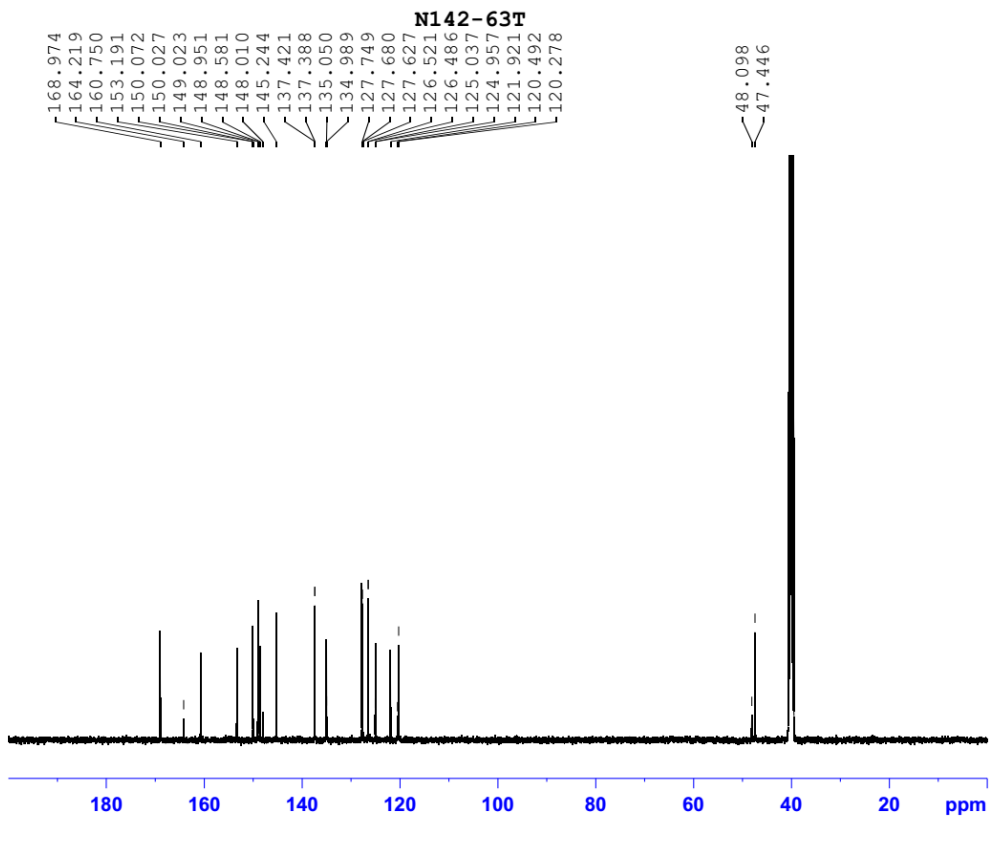

**<sup>1</sup>H NMR of compound 6e**



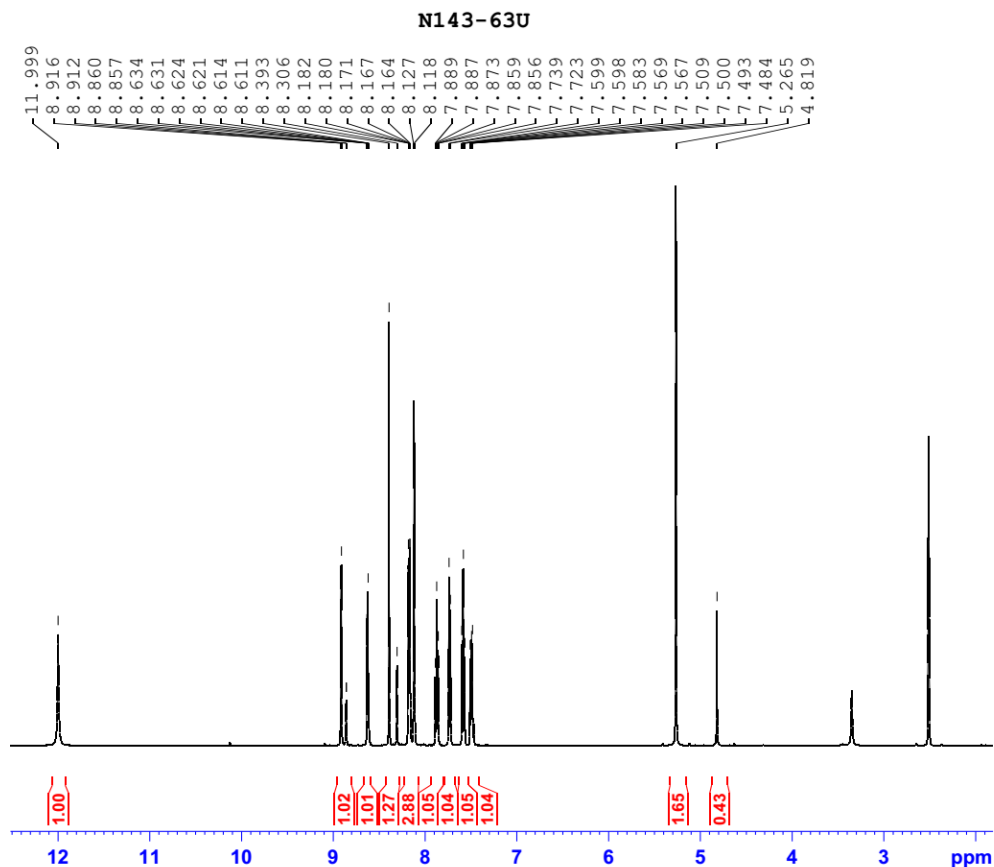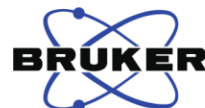

Current Data Parameters  
 NAME N143-63U  
 EXPNO 40  
 PROCNO 1

F2 - Acquisition Parameters  
 Date\_ 20170509  
 Time\_ 21.54  
 INSTRUM spect  
 PROBHD 5 mm PABBO BB/  
 PULPROG zg30  
 TD 65536  
 SOLVENT DMSO  
 NS 16  
 DS 2  
 SWH 10000.000 Hz  
 FIDRES 0.152588 Hz  
 AQ 3.2767999 sec  
 RG 123.67  
 DW 50.000 usec  
 DE 6.50 usec  
 TE 298.1 K  
 D1 1.00000000 sec  
 TD0 1

===== CHANNEL f1 =====  
 SFO1 500.1330885 MHz  
 NUC1 1H  
 P1 9.80 usec  
 PLW1 24.00000000 W

F2 - Processing parameters  
 SI 65536  
 SF 500.1300000 MHz  
 WDW EM  
 SSB 0  
 LB 0.30 Hz  
 GB 0  
 PC 1.00

**<sup>13</sup>C NMR of compound 6e**

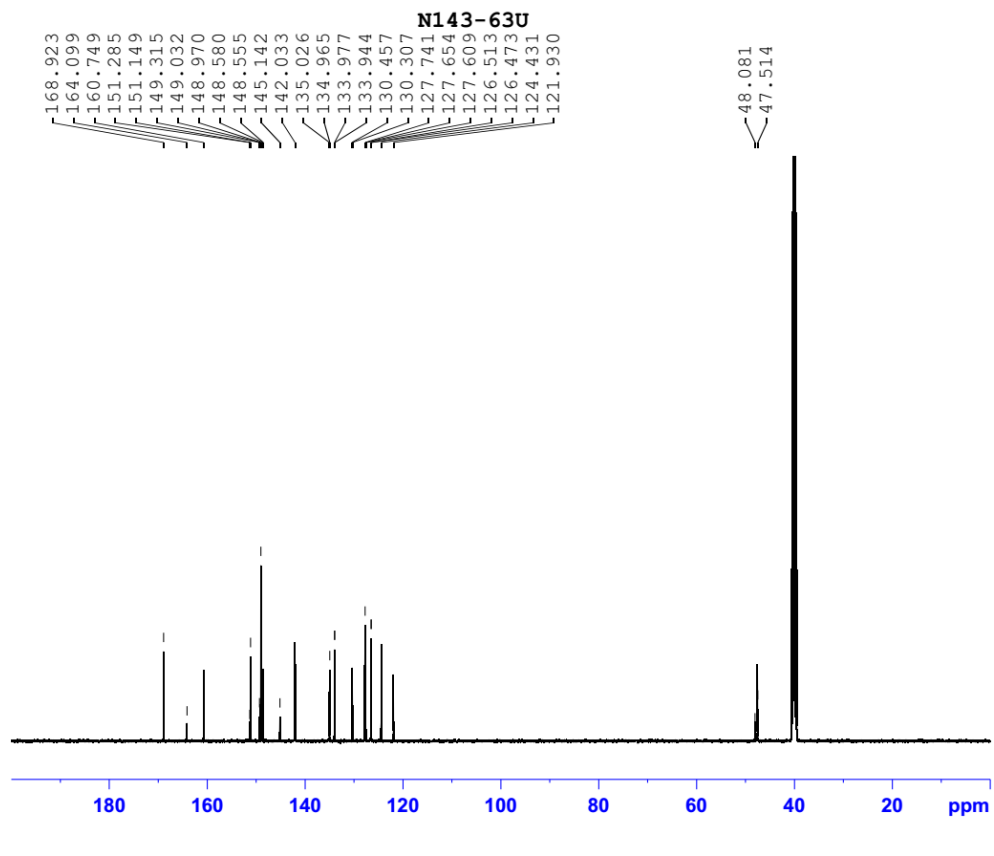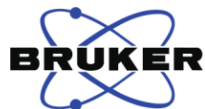

Current Data Parameters  
 NAME N143-63U  
 EXPNO 42  
 PROCNO 1

F2 - Acquisition Parameters  
 Date\_ 20170509  
 Time\_ 23.41  
 INSTRUM spect  
 PROBHD 5 mm PABBO BB/  
 PULPROG zgpg30  
 TD 65536  
 SOLVENT DMSO  
 NS 2048  
 DS 4  
 SWH 31250.000 Hz  
 FIDRES 0.476837 Hz  
 AQ 1.0485760 sec  
 RG 191.38  
 DW 16.000 usec  
 DE 6.50 usec  
 TE 299.2 K  
 D1 2.00000000 sec  
 D11 0.03000000 sec  
 TD0 1

===== CHANNEL f1 =====  
 SFO1 125.7703637 MHz  
 NUC1 13C  
 P1 9.50 usec  
 PLW1 90.00000000 W

===== CHANNEL f2 =====  
 SFO2 500.1320005 MHz  
 NUC2 1H  
 CPDPRG[2] waltz16  
 PCPD2 80.00 usec  
 PLW2 24.00000000 W  
 PLW12 0.36015001 W  
 PLW13 0.23050000 W

F2 - Processing parameters  
 SI 65536  
 SF 125.7577885 MHz  
 WDW EM  
 SSB 0  
 LB 1.00 Hz  
 GB 0  
 PC 1.40

**<sup>1</sup>H NMR of compound 6f**

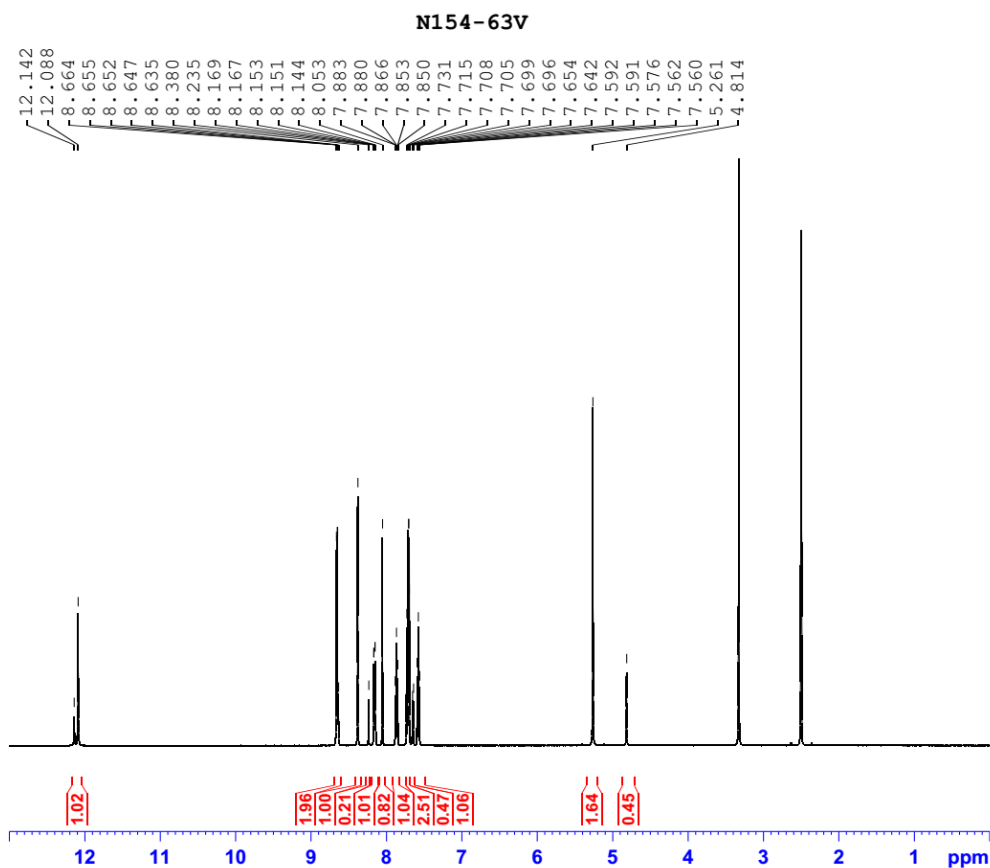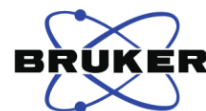

**<sup>13</sup>C NMR of compound 6f**

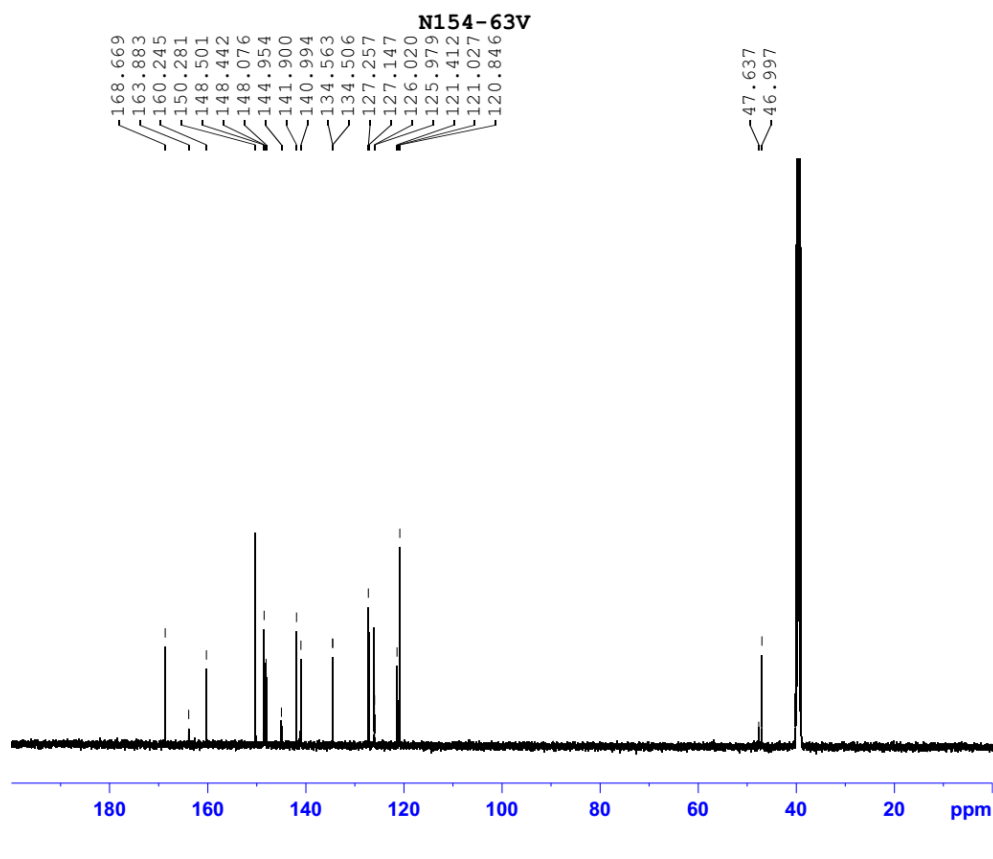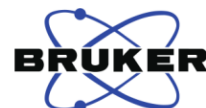

**<sup>1</sup>H NMR of compound 6g**

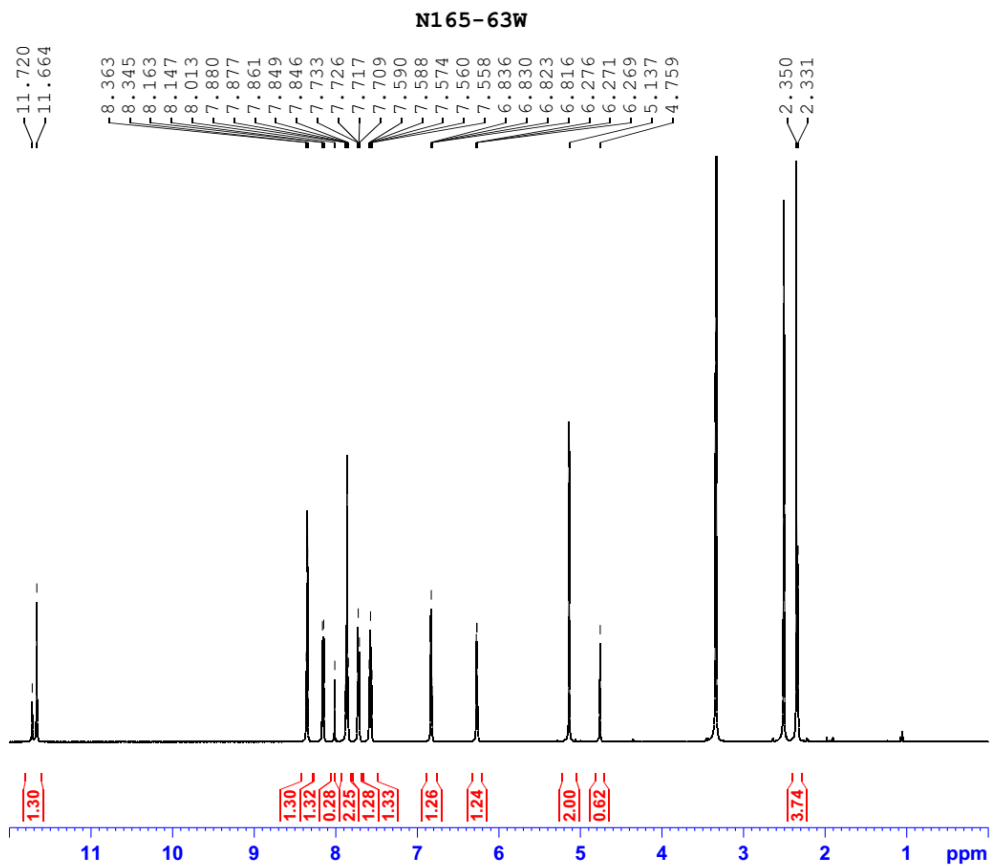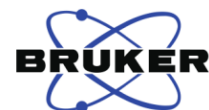

Current Data Parameters  
 NAME N165-63W  
 EXPNO 50  
 PROCNO 1

F2 - Acquisition Parameters  
 Date\_ 20170527  
 Time\_ 7.22  
 INSTRUM spect  
 PROBHD 5 mm PABBO BB/  
 PULPROG zg30  
 TD 65536  
 SOLVENT DMSO  
 NS 16  
 DS 2  
 SWH 10000.000 Hz  
 FIDRES 0.152588 Hz  
 AQ 3.2767999 sec  
 RG 152.54  
 DW 50.000 usec  
 DE 6.50 usec  
 TE 297.6 K  
 D1 1.00000000 sec  
 TD0 1

===== CHANNEL f1 =====  
 SFO1 500.1330885 MHz  
 NUC1 1H  
 P1 9.80 usec  
 PLW1 24.00000000 W

F2 - Processing parameters  
 SI 65536  
 SF 500.1330040 MHz  
 WDW EM  
 SSB 0  
 LB 0.30 Hz  
 GB 0  
 PC 1.00

**<sup>13</sup>C NMR of compound 6g**

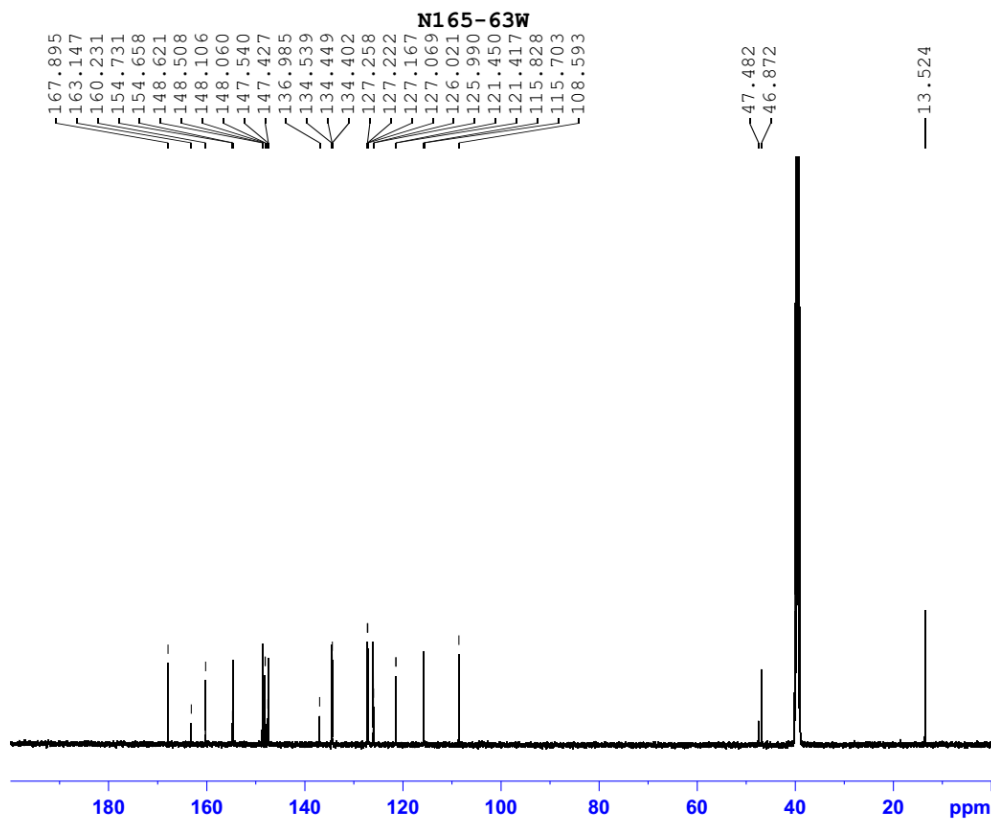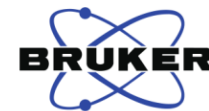

Current Data Parameters  
 NAME N165-63W  
 EXPNO 52  
 PROCNO 1

F2 - Acquisition Parameters  
 Date\_ 20170527  
 Time\_ 10.55  
 INSTRUM spect  
 PROBHD 5 mm PABBO BB/  
 PULPROG zgpg30  
 TD 65536  
 SOLVENT DMSO  
 NS 4096  
 DS 4  
 SWH 31250.000 Hz  
 FIDRES 0.476837 Hz  
 AQ 1.0485760 sec  
 RG 191.38  
 DW 16.000 usec  
 DE 6.50 usec  
 TE 298.8 K  
 D1 2.00000000 sec  
 D11 0.03000000 sec  
 TD0 1

===== CHANNEL f1 =====  
 SFO1 125.7703637 MHz  
 NUC1 13C  
 P1 9.50 usec  
 PLW1 90.00000000 W

===== CHANNEL f2 =====  
 SFO2 500.1320005 MHz  
 NUC2 1H  
 CPDPRG[2] waltz16  
 PCPD2 80.00 usec  
 PLW2 24.00000000 W  
 PLW12 0.36015001 W  
 PLW13 0.23050000 W

F2 - Processing parameters  
 SI 65536  
 SF 125.7578498 MHz  
 WDW EM  
 SSB 0  
 LB 1.00 Hz  
 GB 0  
 PC 1.40

**<sup>1</sup>H NMR of compound 7a**

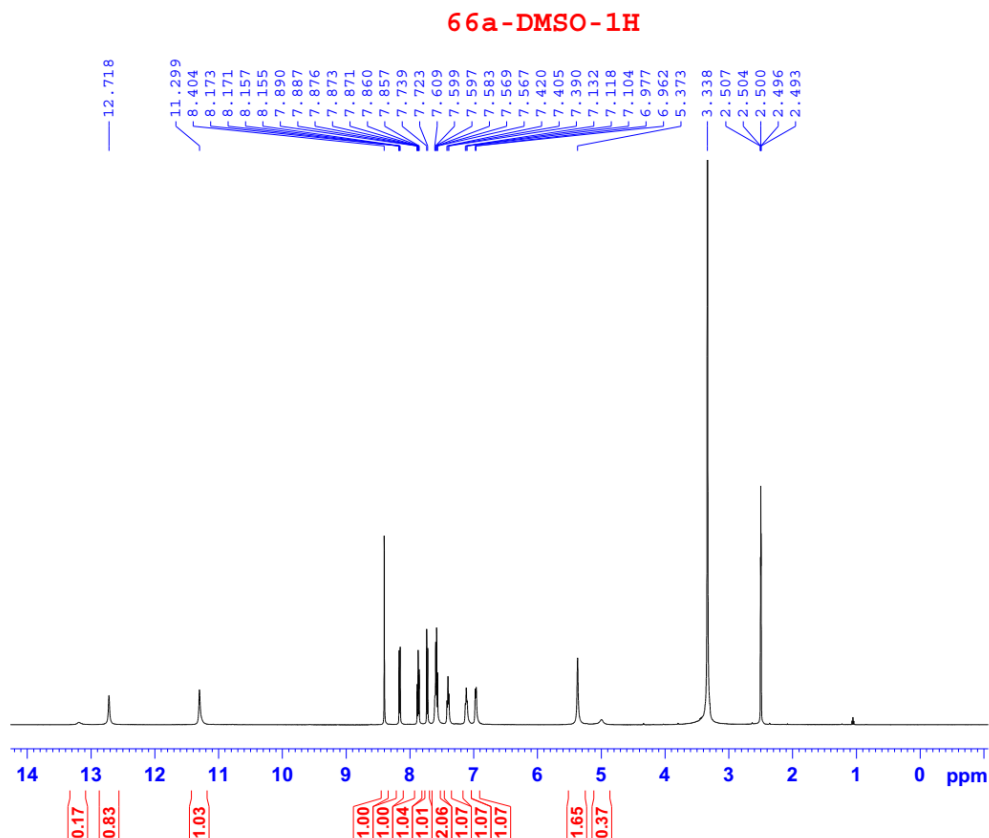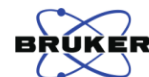

```

Current Data Parameters
NAME          66a
EXPNO        1
PROCNO       1

F2 - Acquisition Parameters
Date_        20170308
Time         16.02
INSTRUM      spect
PROBHD       5 mm PABBO BB/
PULPROG      zg30
TD           65536
SOLVENT      DMSO
NS           16
DS           2
SWH          10000.000 Hz
FIDRES       0.152588 Hz
AQ           3.2767999 sec
RG           97.76
DW           50.000 usec
DE           6.50 usec
TE           303.1 K
D1           1.00000000 sec
D11          1
D10          1

===== CHANNEL f1 =====
SFO1         500.2030889 MHz
NUC1         1H
P1           10.00 usec
PLW1         22.00000000 W

F2 - Processing parameters
SI           65536
SF           500.2000068 MHz
WDW          EM
SSB          0
LB           0.30 Hz
GB           0
PC           1.00
  
```

<sup>13</sup>C NMR of compound 7a

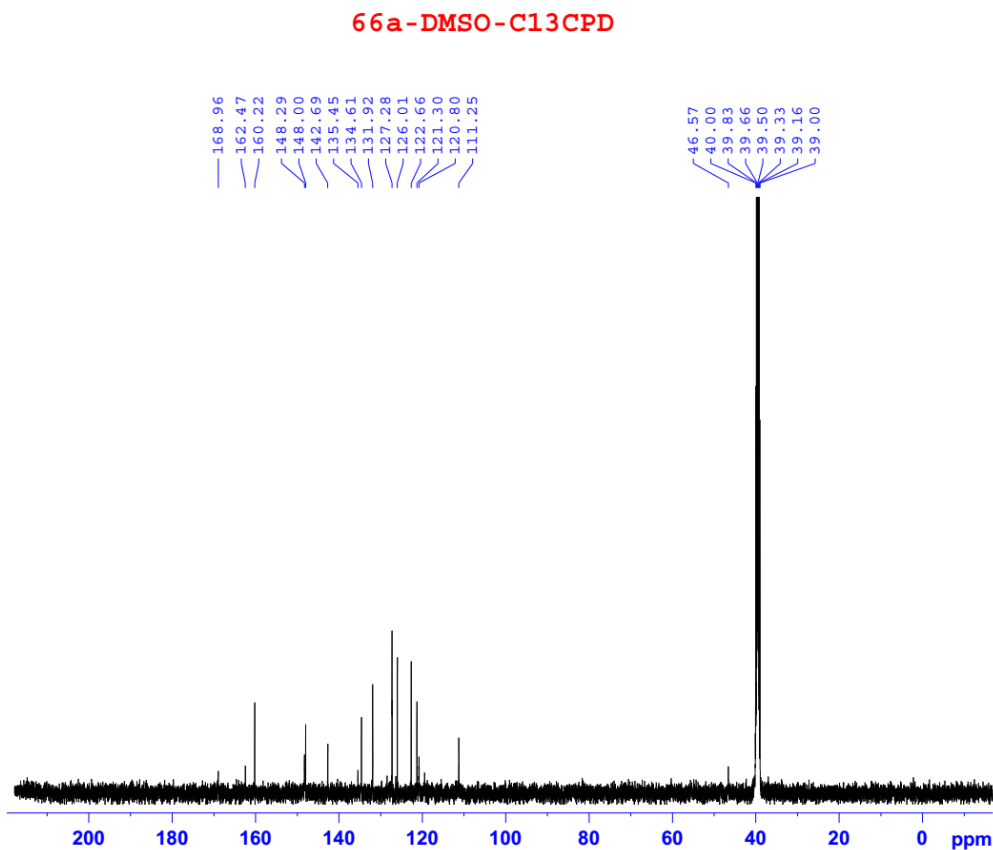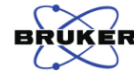

```

Current Data Parameters
NAME          66a
EXPNO        2
PROCNO       1

F2 - Acquisition Parameters
Date_        20170308
Time         18.10
INSTRUM      spect
PROBHD       5 mm PABBO BB/
PULPROG      zg30
TD           65536
SOLVENT      DMSO
NS           256
DS           4
SWH          29761.904 Hz
FIDRES       0.454131 Hz
AQ           1.1010048 sec
RG           198.57
DW           16.800 usec
DE           6.50 usec
TE           303.2 K
D1           2.00000000 sec
D11          0.03000000 sec
D10          1

===== CHANNEL f1 =====
SFO1         125.7879670 MHz
NUC1         13C
P1           10.00 usec
PLW1         88.00000000 W

===== CHANNEL f2 =====
SFO2         500.2020008 MHz
NUC2         1H
CPDPRG[2]    waltz16
PCPD2        80.00 usec
PLW2         22.00000000 W
PLW12        0.34375000 W
PLW13        0.22000000 W

F2 - Processing parameters
SI           32768
SF           125.7754545 MHz
WDW          EM
SSB          0
LB           1.00 Hz
GB           0
PC           1.40
  
```

<sup>1</sup>H NMR of compound 7b

HVH-101 (DMSO,500MHz)

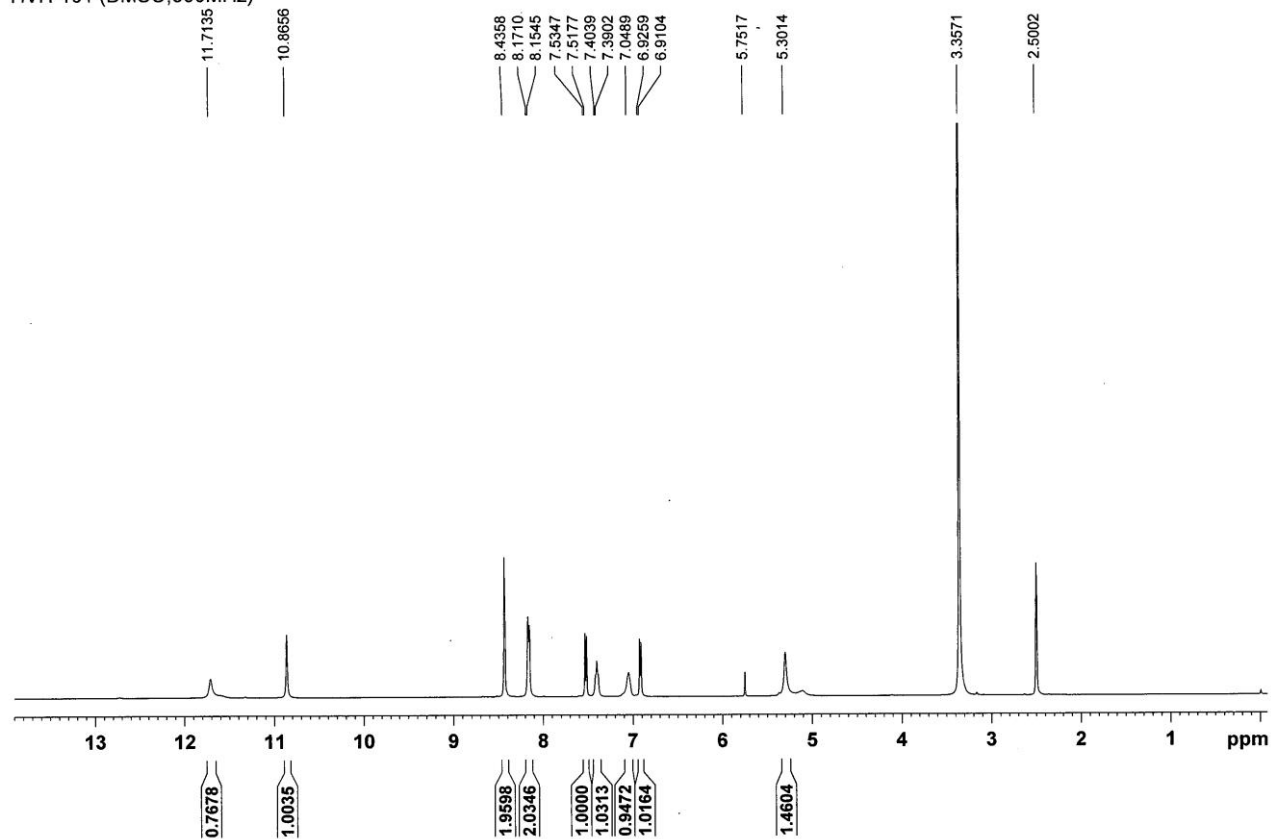

### <sup>13</sup>C NMR of compound 7b

HVH-101 (DMSO,500MHz)

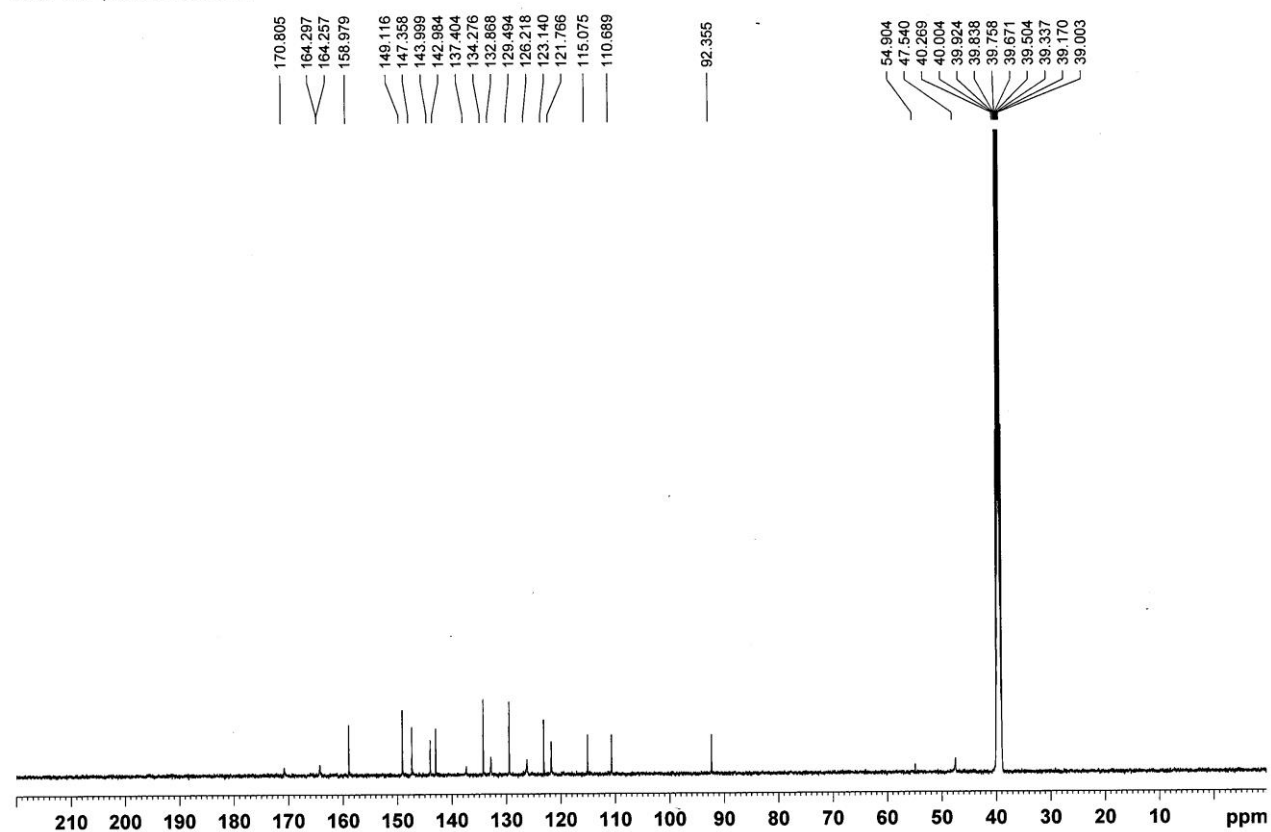

### **Caption for the Graphical Abstract**

A series of (E)-N'-arylidene-2-(4-oxoquinazolin-4(3H)-yl)acetohydrazides with significant cytotoxicity against three human cancer cell lines. Compound 5t displayed cytotoxicity up to 5-fold more potent than 5-FU, meanwhile compound 7b activated caspases activity by almost 200% in comparison to that of PAC-1.
